# Supplementary material for: Impact of Delayed Biospecimen Processing on Serum Proteomics in Samples from a Parabolic Flight
Source: Research Square preprint supplement (doi:10.21203/rs.3.rs-7530087/v1), 2025-09-24
Supplement: Supplementary file 1 [file 55f836197eddbd6bedfe47b3.pdf]

**Supplemental Table 1.** Group 1: Not stable at 24 and 48h.

**Supplemental Table 2.** Group 2: Not stable at 24h, no change at 48h.

**Supplemental Table 3.** Group 3: Inconsistent changes at 24 and 48h.

**Supplemental Table 4.** Group 4: Stable proteome at 24h and not stable at 48h.

**Supplemental Table 5.** Group 5: Stable proteome at 24 and 48h.

**Supplemental Table 6.** Top 30 biochemical pathways for stable proteome at 24h.

**Supplemental Table 7.** Proteins identified as stable within the top 30 pathways through ShinyGO analysis at 24h, are no longer present at 48h.

**Supplemental Table 8.** Top 30 biochemical pathways for stable proteome at 24 and 48h.

**Supplemental Table 9.** Eighty-four proteins exhibited significant dysregulation, with expression changes of two-fold or greater.

A

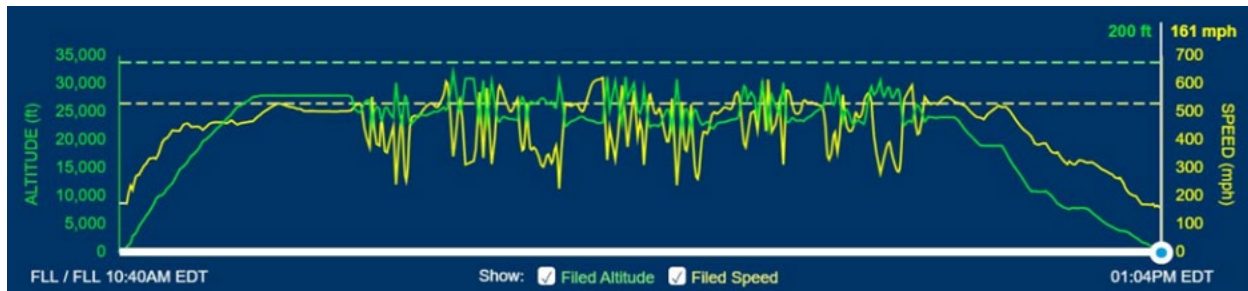

B

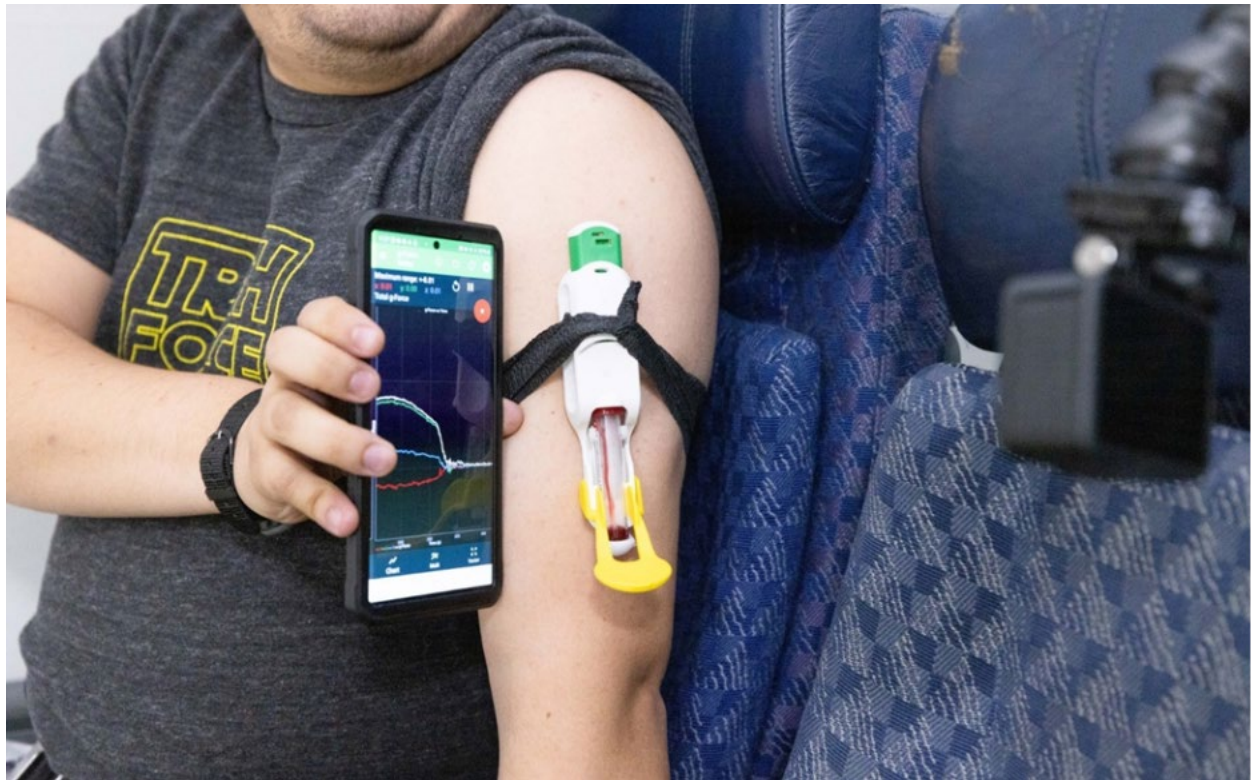

**Figure S1.** Parabolic Flight Experiment (A) Altitude (green, left axis; ft) and airspeed (yellow, right axis; mph) versus time for the Boeing 727 parabolic flight from FLL (10:40 AM–1:04 PM EDT). The repeated climb/pull-up and pushover segments outline successive parabolas executed in the 25,000–30,000 ft band. Dashed lines denote the planned altitude envelope. (B) Photograph inside the aircraft cabin showing the ezdraw self-collection device secured to the participant’s upper arm while a smartphone app records continuous  $\pm X$ ,  $\pm Y$ ,  $\pm Z$  acceleration (g). The traces capture the hypergravity pull-ups and microgravity intervals, enabling time-locking of sample collection to the 0-g phases.
