# Supplementary material for: Impact of Delayed Biospecimen Processing on Serum Proteomics in Samples from a Parabolic Flight
Source: Research Square preprint supplement (doi:10.21203/rs.3.rs-7530087/v1), 2025-09-24
Supplement: Supplementary file 2 [file 30ab884c9173b0f4fc943e5e.xlsx]

## Sheet: Table S2
Supplemental Table 2. Group 2: Not stable at 24h, no change at 48h.
Glossary of terms
UniProt ID	A unique identifier assigned by the UniProt database to a specific protein
Protein name	The common or scientific name of the protein associated with the UniProt ID
OlinkID	Identifier used by Olink Proteomics for a specific protein assay in OLINK Explore HT panel
Gene Name	The name of the gene that encodes the protein
NPX difference From0to24h	The change in NPX (Normalized Protein eXpression) values between 0 and 24h. NPX is a relative quantification metric used in Olink assays.
NPX difference From24to48h	The change in NPX values between 24 and 48h
Adjusted_pval in lmer results	The adjusted p-value from a linear mixed-effects model (lmer), accounting for multiple testing. Used to assess statistical significance of protein expression changes over time.
From0to24h, Adjusted pvalue in post hoc	Adjusted p-value from post hoc analysis comparing 0 to 24h. Indicates whether the change is statistically significant after correction.
From24to48h, Adjusted pvalue in post hoc	Adjusted p-value from post hoc analysis comparing 24 to 48h.
UniProt ID	Protein name	OlinkID	Gene Name	NPX difference From0to24h	NPX difference From24to48h	Adjusted_pval in lmer results	From0to24h, Adjusted pvalue in post hoc	From24to48h, Adjusted pvalue in post hoc
Q96IU4	Putative protein-lysine deacylase ABHD14B	OID43313	ABHD14B	1.48059	0.544591	0.0339387	0.01136	0.0697687
Q9H845	Complex I assembly factor ACAD9, mitochondrial	OID40004	ACAD9	3.72406	-0.31226	0.0173494	0.00148057	0.770508
P15309	Prostatic acid phosphatase	OID42084	ACP3	0.539085	0.199701	0.038618	0.0138715	0.0786675
Q8N4X5	Actin filament-associated protein 1-like 2	OID42096	AFAP1L2	1.18862	0.114101	0.023544	0.0024221	0.544452
O00203	AP-3 complex subunit beta-1	OID43370	AP3B1	1.63671	0.32734	0.00765605	0.000774008	0.0509301
P62330	ADP-ribosylation factor 6	OID43377	ARF6	1.77707	-0.0255401	0.00704268	0.000387664	0.950547
Q9Y2Y0	ADP-ribosylation factor-like protein 2-binding protein	OID42142	ARL2BP	1.01627	0.110295	0.0327842	0.00514974	0.523495
Q7Z6K5	Arpin	OID40825	ARPIN	-6.33629	0.363998	0.0118751	0.000802451	0.607992
Q8N9N2	Activating signal cointegrator 1 complex subunit 1	OID43388	ASCC1	1.50857	0.300148	0.0155837	0.00226817	0.113178
P50553	Achaete-scute homolog 1	OID40830	ASCL1	-0.602665	-0.0532864	0.020601	0.0025308	0.539075
O00244	Copper transport protein ATOX1	OID44471	ATOX1	0.938272	0.0686262	0.00875667	0.000696429	0.450024
P61769	Beta-2-microglobulin	OID45441	B2M	-0.32249	0.0291803	0.0103367	0.000631692	0.310697
P56817	Beta-secretase 1	OID40848	BACE1	0.763646	-0.0985744	0.0249944	0.00231	0.599964
Q9NRL2	Bromodomain adjacent to zinc finger domain protein 1A	OID40050	BAZ1A	1.01048	0.0677975	0.0345104	0.00507684	0.759714
Q9NYF8	Bcl-2-associated transcription factor 1	OID40857	BCLAF1	-4.15589	-0.630345	0.0390996	0.00748473	0.389138
Q13489	Baculoviral IAP repeat-containing protein 3	OID40058	BIRC3	5.41101	0.593436	0.0329778	0.00512374	0.522076
Q5H9B9	Putative BMP-2-inducible kinase-like protein	OID40866	BMP2KL	2.81608	0.402372	0.0321051	0.00687084	0.652154
P12644	Bone morphogenetic protein 4	OID43416	BMP4	-1.19277	-0.0148361	0.0175913	0.00163206	0.982607
P18075	Bone morphogenetic protein 7	OID43418	BMP7	-0.502736	-0.0322257	0.00233508	0.000109369	0.706366
Q12982	BCL2/adenovirus E1B 19 kDa protein-interacting protein 2	OID44478	BNIP2	1.49151	-0.325053	0.0141908	0.000727815	0.0565791
Q9Y2F9	BTB/POZ domain-containing protein 3	OID40874	BTBD3	-4.14943	1.13499	0.0451451	0.00546583	0.0911805
Q6UXG8	Butyrophilin-like protein 9	OID40878	BTNL9	7.22257	-0.334177	0.000504022	4.92512e-06	0.108691
Q8IYJ2	Uncharacterized protein C10orf67, mitochondrial	OID40070	C10orf67	-2.23901	-0.168364	0.000504022	1.19137e-05	0.420664
Q8IXR9	Uncharacterized protein C12orf56	OID40883	C12orf56	-4.75621	-0.0537078	2.05538e-05	5.50786e-08	0.896538
P02745	Complement C1q subcomponent subunit A	OID43432	C1QA	-0.127086	-0.0265497	0.0134405	0.00185891	0.0858215
Q9BXJ0	Complement C1q tumor necrosis factor-related protein 5	OID44485	C1QTNF5	-0.22982	-0.01246	0.0338282	0.0047182	0.827829
P00736	Complement C1r subcomponent	OID45319	C1R	-0.368423	0.0837301	0.0483966	0.00563062	0.161921
O14523	Phospholipid transfer protein C2CD2L	OID42202	C2CD2L	2.49574	0.188278	0.00868993	0.00023956	0.457318
Q6ZUJ4	Uncharacterized protein C3orf62	OID40901	C3orf62	1.89287	0.0685978	0.00361372	0.00019749	0.908479
P01031	Complement C5	OID45447	C5	-1.24547	0.275006	0.0244839	0.00204049	0.254433
Q8N1Q1	Carbonic anhydrase 13	OID44489	CA13	1.74746	0.117052	0.00795271	0.000571484	0.474313
Q9HB71	Calcyclin-binding protein	OID44490	CACYBP	1.34144	0.184899	0.0149554	0.00179088	0.233163
P42575	Caspase-2	OID43453	CASP2	1.385	0.0794655	0.00581451	0.000355713	0.493409
Q6P1N0	Coiled-coil and C2 domain-containing protein 1A	OID43460	CC2D1A	1.55933	0.248986	0.00704728	0.000603667	0.0808604
Q49A88	Coiled-coil domain-containing protein 14	OID40938	CCDC14	1.18008	0.00015528	0.0189742	0.00187224	0.999998
P06307	Cholecystokinin	OID43467	CCK	-1.93993	0.240253	0.0118751	0.000748537	0.511086
O00626	C-C motif chemokine 22	OID44500	CCL22	-0.0681977	0.0033336	0.00298036	0.000114666	0.395414
P10147	C-C motif chemokine 3	OID43473	CCL3	1.17108	-0.0225576	0.00456556	0.000230842	0.887778
P80098	C-C motif chemokine 7	OID43474	CCL7	3.61965	1.46587	0.0451451	0.0176189	0.0855729
Q5ZPR3	CD276 antigen	OID44508	CD276	-0.185924	-0.0269887	0.0430854	0.00842346	0.432
P16671	Platelet glycoprotein 4	OID42240	CD36	0.490802	0.0615657	0.0136144	0.00151379	0.257519
P14209	CD99 antigen	OID45062	CD99	0.278381	0.067175	0.0318724	0.00699567	0.15041
Q9Y5S2	Serine/threonine-protein kinase MRCK beta	OID43505	CDC42BPB	0.747133	0.13937	0.00699408	0.000636062	0.0527155
Q69YH5	Cell division cycle-associated protein 2	OID40099	CDCA2	8.37259	-0.417624	0.000504022	4.65296e-06	0.086053
P55273	Cyclin-dependent kinase 4 inhibitor D	OID43509	CDKN2D	1.38732	0.1711	0.00666776	0.000490065	0.142175
P31997	Carcinoembryonic antigen-related cell adhesion molecule 8	OID43515	CEACAM8	0.386526	-0.0507121	0.0084108	0.00046015	0.113721
Q9UHN6	Cell surface hyaluronidase	OID42265	CEMIP2	0.764551	-0.111727	0.0245195	0.00218293	0.234098
Q8N8E3	Centrosomal protein of 112 kDa	OID42270	CEP112	5.74418	0.0172586	0.0293732	0.00338098	0.999277
Q5SW79	Centrosomal protein of 170 kDa	OID43517	CEP170	0.946377	0.06929	0.00276808	0.000125875	0.202919
P41208	Centrin-2	OID42283	CETN2	1.19883	0.115675	0.0125287	0.00120823	0.368006
P08603	Complement factor H	OID45453	CFH	-0.383218	-0.0394318	0.0271801	0.00341736	0.531302
P36980	Complement factor H-related protein 2	OID45454	CFHR2	-0.522263	-0.102665	0.0321051	0.00573156	0.238863
Q6FI81	Anamorsin	OID44541	CIAPIN1	1.42321	0.160246	0.00795271	0.000646043	0.205387
Q14011	Cold-inducible RNA-binding protein	OID43528	CIRBP	0.702277	-0.037219	0.0451451	0.00526	0.8575
Q7Z460	CLIP-associating protein 1	OID42295	CLASP1	-0.101283	-0.0471655	0.0339387	0.0240609	0.121345
Q9P126	C-type lectin domain family 1 member B	OID44545	CLEC1B	1.19129	0.201538	0.0115232	0.00128946	0.118064
P04118	Colipase	OID45077	CLPS	-0.440542	-0.0677435	0.0178264	0.00250598	0.222617
P78560	Death domain-containing protein CRADD	OID43562	CRADD	1.30116	0.172167	0.00368874	0.000224497	0.0658934
P46109	Crk-like protein	OID44571	CRKL	1.077	0.013936	0.00513459	0.000264013	0.953535
P53674	Beta-crystallin B1	OID44573	CRYBB1	0.944239	0.236798	0.0181033	0.00340038	0.0806306
P10145	Interleukin-8	OID43586	CXCL8	6.46964	0.173206	0.000117721	4.80668e-07	0.747793
A8MQ03	Cysteine-rich tail protein 1	OID40146	CYSRT1	-5.46141	-0.168364	1.55811e-05	3.0852e-08	0.420664
Q14118	Dystroglycan 1	OID44591	DAG1	0.518854	0.107317	0.0318663	0.00626133	0.202921
Q9UJU6	Drebrin-like protein	OID44593	DBNL	0.874721	0.0680196	0.031042	0.00433646	0.680575
Q9C098	Serine/threonine-protein kinase DCLK3	OID40151	DCLK3	-5.07833	-0.297404	0.00238712	0.000105753	0.280537
Q8WXX0	Dynein axonemal heavy chain 7	OID40167	DNAH7	5.77267	-0.241814	0.00482884	0.000254197	0.888638
P59910	DnaJ homolog subfamily B member 13	OID41113	DNAJB13	2.14792	0.308343	0.0121648	0.00126726	0.179522
Q8NHS0	DnaJ homolog subfamily B member 8	OID43620	DNAJB8	0.473816	0.0685656	0.000532307	1.82415e-05	0.103573
Q9NZQ0	DnaJ homolog subfamily C member 27	OID40169	DNAJC27	1.43961	0.0511345	0.00276018	0.000125842	0.899468
Q6XZF7	Dynamin-binding protein	OID43627	DNMBP	1.04047	0.270139	0.0249944	0.00536936	0.102998
Q96BY6	Dedicator of cytokinesis protein 10	OID41119	DOCK10	2.05032	-0.202562	0.0296117	0.00176423	0.530992
Q68J44	Dual specificity phosphatase 29	OID42389	DUSP29	-0.722553	-0.191122	0.0298211	0.00697091	0.117713
P51452	Dual specificity protein phosphatase 3	OID42390	DUSP3	2.07991	0.125919	0.023544	0.00218151	0.758961
P29692	Elongation factor 1-delta	OID44616	EEF1D	1.81665	0.224702	0.00705412	0.000549307	0.149465
Q9H223	EH domain-containing protein 4	OID42399	EHD4	1.49436	0.188511	0.003971	0.000239285	0.0828804
Q6ZTU2	Putative EP400-like protein	OID40201	EP400P1	5.7669	-0.153764	0.003971	0.000117869	0.793005
Q6UW88	Epigen	OID43681	EPGN	0.440647	-0.0816938	0.007836	0.000203181	0.0501998
Q9NQ30	Endothelial cell-specific molecule 1	OID44637	ESM1	-0.906959	-0.10336	0.000567988	1.86322e-05	0.209606
Q9BSJ8	Extended synaptotagmin-1	OID44638	ESYT1	1.27728	0.0772448	0.00123873	4.78411e-05	0.157454
A0FGR8	Extended synaptotagmin-2	OID43691	ESYT2	1.89596	0.315577	0.011822	0.00128258	0.128155
O60447	Ecotropic viral integration site 5 protein homolog	OID43693	EVI5	1.47349	0.144057	0.0268368	0.00373112	0.53819
Q03828	Homeobox even-skipped homolog protein 2	OID40210	EVX2	-2.01144	0.412944	0.0331743	0.00321699	0.141679
Q9UPT5	Exocyst complex component 7	OID41176	EXOC7	2.33999	-0.122619	0.000567988	9.04676e-06	0.0953696
Q96CS3	FAS-associated factor 2	OID42437	FAF2	0.726176	0.0247197	0.0012717	4.70512e-05	0.455216
Q6PCT2	F-box/LRR-repeat protein 19	OID40232	FBXL19	6.92016	-0.368313	0.000519698	6.3108e-06	0.0789956
P49789	Bis(5'-adenosyl)-triphosphatase	OID42464	FHIT	1.67797	0.123688	0.0172514	0.00185549	0.591259
Q9NWM8	Peptidyl-prolyl cis-trans isomerase FKBP14	OID43715	FKBP14	2.08084	0.266021	0.00565522	0.00041399	0.115265
Q13451	Peptidyl-prolyl cis-trans isomerase FKBP5	OID43718	FKBP5	0.51893	0.0537919	0.0173494	0.00205175	0.409491
Q9BQS8	FYVE and coiled-coil domain-containing protein 1	OID42484	FYCO1	1.75214	0.244283	0.00379411	0.000240261	0.060131
Q96PP9	Guanylate-binding protein 4	OID42500	GBP4	1.68344	0.0186986	0.0184056	0.00140164	0.987463
Q99988	Growth/differentiation factor 15	OID45131	GDF15	0.138697	-0.0286329	0.0229079	0.0019798	0.0924925
Q9BVM4	Gamma-glutamylaminecyclotransferase	OID44677	GGACT	1.49148	0.370314	0.0383466	0.00935429	0.174774
Q6Y7W6	GRB10-interacting GYF protein 2	OID43752	GIGYF2	1.01434	0.194504	0.0104156	0.00120552	0.0795203
Q8TF64	PDZ domain-containing protein GIPC3	OID43755	GIPC3	0.686197	0.0692211	0.0216945	0.00276713	0.476972
Q9HC38	Glyoxalase domain-containing protein 4	OID44684	GLOD4	0.952136	0.195519	0.0321051	0.00647352	0.20772
O60234	Glia maturation factor gamma	OID44687	GMFG	1.04059	-0.107091	0.00371272	0.000148707	0.0965536
Q92805	Golgin subfamily A member 1	OID42525	GOLGA1	1.82679	0.334621	0.0165617	0.00235136	0.144634
Q08379	Golgin subfamily A member 2	OID41252	GOLGA2	1.14242	0.0347606	0.000156138	8.58763e-07	0.725157
P07359	Platelet glycoprotein Ib alpha chain	OID45365	GP1BA	0.5188	0.127131	0.0462454	0.0116758	0.215223
P13224	Platelet glycoprotein Ib beta chain	OID43770	GP1BB	0.600695	-0.0927005	0.048165	0.00550528	0.352091
Q9HCN6	Platelet glycoprotein VI	OID45136	GP6	0.560183	0.044525	0.00709069	0.000488081	0.350566
O75791	GRB2-related adapter protein 2	OID44694	GRAP2	1.03435	-0.317528	0.0415704	0.0049264	0.0619427
Q9C0E4	Glutamate receptor-interacting protein 2	OID42535	GRIP2	0.855731	0.132031	0.017415	0.0023725	0.215189
P69892	Hemoglobin subunit gamma-2	OID41280	HBG2	7.37017	1.03749	0.00186155	0.000102475	0.235408
Q9P2P5	E3 ubiquitin-protein ligase HECW2	OID40284	HECW2	5.34511	0.928257	0.0173494	0.00223073	0.180824
Q12794	Hyaluronidase-1	OID45371	HYAL1	-0.151247	0.0131773	0.0483966	0.00533548	0.689542
O14879	Interferon-induced protein with tetratricopeptide repeats 3	OID42584	IFIT3	1.1634	0.2501	0.0136144	0.00193257	0.0809505
Q8IY31	Intraflagellar transport protein 20 homolog	OID42589	IFT20	0.851199	0.0139203	0.0335292	0.00433645	0.981187
Q9Y6K9	NF-kappa-B essential modulator	OID43841	IKBKG	0.923869	0.114733	0.0161233	0.00193632	0.295863
Q14627	Interleukin-13 receptor subunit alpha-2	OID42601	IL13RA2	6.43898	-0.0568995	0.000172212	1.00483e-06	0.973178
P05112	Interleukin-4	OID42627	IL4	7.18423	0.212792	0.0158088	0.00104941	0.907475
O15327	Inositol polyphosphate 4-phosphatase type II	OID42633	INPP4B	1.55176	-0.113276	0.0200199	0.00176475	0.596423
Q13576	Ras GTPase-activating-like protein IQGAP2	OID43869	IQGAP2	2.33522	0.275525	0.00912958	0.000768891	0.2196
Q8NA54	IQ and ubiquitin-like domain-containing protein	OID40315	IQUB	1.41171	0.0922272	0.0355926	0.00498211	0.779885
Q12912	Inositol 1,4,5-triphosphate receptor associated 2	OID43870	IRAG2	1.37976	0.260867	0.0193724	0.00309133	0.158373
Q14653	Interferon regulatory factor 3	OID44723	IRF3	1.41934	0.265414	0.0186065	0.00290067	0.157437
Q96J02	E3 ubiquitin-protein ligase Itchy homolog	OID42637	ITCH	1.47514	-0.246345	0.0126488	0.000802457	0.08952
P20702	Integrin alpha-X	OID42638	ITGAX	6.53297	0.347523	0.00322027	0.000139883	0.408678
Q9UKP3	Integrin beta-1-binding protein 2	OID43879	ITGB1BP2	1.18505	0.154985	0.0223119	0.00314047	0.340255
Q14624	Inter-alpha-trypsin inhibitor heavy chain H4	OID45472	ITIH4	-0.649614	0.0610105	0.0398418	0.00472933	0.59246
Q9NZV8	Potassium voltage-gated channel subfamily D member 2	OID41359	KCND2	5.04382	0.228728	0.0125287	0.000531054	0.773403
Q9UKR3	Kallikrein-13	OID43896	KLK13	-0.961164	-0.192051	0.00123873	8.08583e-05	0.0738032
Q15323	Keratin, type I cuticular Ha1	OID41398	KRT31	-1.18237	-0.253279	0.00875667	0.00103239	0.0509118
Q53H82	Endoribonuclease LACTB2	OID44738	LACTB2	1.28887	0.285846	0.0136672	0.00202574	0.0776212
Q7L5N7	Lysophosphatidylcholine acyltransferase 2	OID43930	LPCAT2	1.18964	0.133242	0.0461283	0.00857499	0.584029
Q3MHD2	Protein LSM12	OID41431	LSM12	1.69341	0.48579	0.0258436	0.00592784	0.0886835
Q9Y6Y9	Lymphocyte antigen 96	OID43947	LY96	-0.369257	0.0772323	0.0297129	0.00286087	0.117505
Q99683	Mitogen-activated protein kinase kinase kinase 5	OID42736	MAP3K5	1.05966	-0.0677168	0.0321051	0.00352675	0.742253
Q9BPZ7	Target of rapamycin complex 2 subunit MAPKAP1	OID41451	MAPKAP1	2.93362	0.0381744	0.00346177	0.000153363	0.934201
P10636	Microtubule-associated protein tau	OID42741	MAPT	6.22562	0.580362	0.00425507	0.000108905	0.218474
Q7Z434	Mitochondrial antiviral-signaling protein	OID42743	MAVS	1.08603	-0.0728007	0.0041259	0.000142554	0.307858
O15068	Guanine nucleotide exchange factor DBS	OID43964	MCF2L	1.5795	0.132194	0.00610552	0.000401847	0.294325
P21741	Midkine	OID44772	MDK	-0.504111	-0.0151911	0.0362726	0.00498095	0.942952
Q8TC05	Nuclear protein MDM1	OID42746	MDM1	1.64464	0.282983	0.0297033	0.00496114	0.273647
Q16820	Meprin A subunit beta	OID44776	MEP1B	-0.20134	-0.0321085	0.0158088	0.00204888	0.185078
P16455	Methylated-DNA--protein-cysteine methyltransferase	OID43971	MGMT	1.3244	0.245586	0.00696225	0.000624933	0.0529369
P39900	Macrophage metalloelastase	OID43980	MMP12	-0.279017	0.00306473	0.00431101	0.000216309	0.959978
P22894	Neutrophil collagenase	OID44787	MMP8	1.0401	-0.0666422	0.0297129	0.00317261	0.727306
O95866	Megakaryocyte and platelet inhibitory receptor G6b	OID44791	MPIG6B	0.866917	-0.0312952	0.00194773	1.69872e-05	0.495224
P11586	C-1-tetrahydrofolate synthase, cytoplasmic	OID42781	MTHFD1	1.54374	0.15936	0.00233508	0.000108862	0.0762752
Q9H2K0	Translation initiation factor IF-3, mitochondrial	OID43995	MTIF3	6.9909	-0.418205	0.0246927	0.00233265	0.732296
O43312	Protein MTSS 1	OID43997	MTSS1	1.13816	0.219249	0.00818223	0.000812463	0.0628463
Q02045	Myosin light chain 5	OID41506	MYL5	6.22954	-0.631203	0.00233508	7.39556e-05	0.0630317
Q9Y4I1	Unconventional myosin-Va	OID41511	MYO5A	2.19521	0.272231	0.00696225	0.000516088	0.145734
Q6ZNJ1	Neurobeachin-like protein 2	OID41524	NBEAL2	1.8734	-0.142075	0.0130019	0.000879178	0.477799
Q9UHB4	NADPH-dependent diflavin oxidoreductase 1	OID40449	NDOR1	0.351979	0.135635	0.0332931	0.011688	0.0606572
Q9Y639	Neuroplastin	OID42848	NPTN	-0.557097	0.0348859	0.0042458	0.000192417	0.342701
Q9H0P0	Cytosolic 5'-nucleotidase 3A	OID44041	NT5C3A	2.17104	-0.10617	0.00373012	0.000155499	0.458404
O75665	Centriole and centriolar satellite protein OFD1	OID42865	OFD1	2.20409	-0.432395	0.0355926	0.00372853	0.164432
P13725	Oncostatin-M	OID44062	OSM	0.696822	0.202359	0.0176654	0.00366174	0.0546815
Q01804	OTU domain-containing protein 4	OID41577	OTUD4	0.867368	0.11872	0.0378168	0.00655149	0.443261
Q8N6M0	Deubiquitinase OTUD6B	OID44063	OTUD6B	1.0746	0.0580956	0.0296117	0.00383271	0.81213
Q9NRA1	Platelet-derived growth factor C	OID42891	PDGFC	0.422274	-0.129115	0.0364571	0.00401623	0.0536992
Q9NR12	PDZ and LIM domain protein 7	OID44843	PDLIM7	1.62796	0.0530621	0.000172212	3.08882e-08	0.078649
Q9Y237	Peptidyl-prolyl cis-trans isomerase NIMA-interacting 4	OID42908	PIN4	1.56239	0.322034	0.0193951	0.00322511	0.133917
Q13563	Polycystin-2	OID44097	PKD2	1.62784	0.250734	0.0125287	0.00135478	0.163215
Q8TC44	POC1 centriolar protein homolog B	OID41637	POC1B	1.84265	0.218566	0.00747316	0.000593433	0.172962
Q9BY77	Polymerase delta-interacting protein 3	OID41642	POLDIP3	1.78858	0.108653	0.0398657	0.00721332	0.923212
Q13136	Liprin-alpha-1	OID41650	PPFIA1	0.825796	0.183789	0.037596	0.00852594	0.205173
O75335	Liprin-alpha-4	OID41651	PPFIA4	6.8466	0.283935	0.00337054	0.000153456	0.554384
P36873	Serine/threonine-protein phosphatase PP1-gamma catalytic subunit	OID44115	PPP1CC	0.707514	-0.0230018	0.0128585	0.000960154	0.853475
P10644	cAMP-dependent protein kinase type I-alpha regulatory subunit	OID44869	PRKAR1A	0.736235	0.238723	0.0265015	0.00704571	0.0671717
Q13976	cGMP-dependent protein kinase 1	OID44870	PRKG1	2.32517	0.167891	0.00201189	8.1107e-05	0.154928
P24158	Myeloblastin	OID45238	PRTN3	0.795224	-0.0994879	0.0136177	0.00095898	0.202405
Q9H939	Proline-serine-threonine phosphatase-interacting protein 2	OID44876	PSTPIP2	1.46883	0.26584	0.0249507	0.00423962	0.212391
P26022	Pentraxin-related protein PTX3	OID44882	PTX3	1.28909	0.142841	0.0436948	0.00774224	0.580839
O00194	Ras-related protein Rab-27B	OID44889	RAB27B	0.349827	0.0169278	0.0113389	0.000925512	0.709049
Q8WUD1	Ras-related protein Rab-2B	OID44159	RAB2B	0.963551	0.0594332	0.0104157	0.000848808	0.577307
Q96AX2	Ras-related protein Rab-37	OID42974	RAB37	1.35171	-0.0969136	0.00242024	8.7152e-05	0.163909
Q96QF0	Rab-3A-interacting protein	OID44161	RAB3IP	1.56615	0.322817	0.0116203	0.00144921	0.0748725
Q9NRW1	Ras-related protein Rab-6B	OID42978	RAB6B	1.35941	-0.11426	0.0270656	0.00267364	0.573748
Q15276	Rab GTPase-binding effector protein 1	OID44890	RABEP1	1.81637	0.223719	0.00868993	0.000771089	0.187566
Q96B01	RAD51-associated protein 1	OID41692	RAD51AP1	5.18888	0.0396615	0.0128142	0.00117192	0.997567
Q6ZRY4	RNA-binding protein with multiple splicing 2	OID44175	RBPMS2	1.64724	-0.0500071	0.00299326	0.000118255	0.923842
Q96D71	RalBP1-associated Eps domain-containing protein 1	OID43005	REPS1	3.14804	0.137728	0.00742914	0.000580851	0.905618
P07949	Proto-oncogene tyrosine-protein kinase receptor Ret	OID44179	RET	-0.124497	0.0279919	0.0399082	0.00452309	0.132689
P12724	Eosinophil cationic protein	OID44899	RNASE3	0.866769	-0.0247077	0.00761504	0.000438086	0.834382
A8MTL3	RING finger protein 212B	OID40571	RNF212B	-0.712895	0.163711	0.0436948	0.00503241	0.1376
Q9Y3A5	Ribosome maturation protein SBDS	OID41768	SBDS	2.41593	-0.0857111	0.0303113	0.00301846	0.90948
Q93073	Selenocysteine insertion sequence-binding protein 2-like	OID40589	SECISBP2L	6.73244	-0.103209	0.0113389	0.000695181	0.962812
Q16181	Septin-7	OID43063	SEPTIN7	2.11471	-0.0462423	0.00546979	0.000236968	0.878927
Q92599	Septin-8	OID44227	SEPTIN8	1.17009	0.151452	0.0398657	0.00514458	0.512807
P35237	Serpin B6	OID44922	SERPINB6	1.15445	0.225767	0.00850606	0.000926446	0.0614107
P50453	Serpin B9	OID44232	SERPINB9	1.0774	0.0301856	0.0125287	0.000923983	0.894457
P01008	Antithrombin-III	OID45495	SERPINC1	-0.214675	-0.0778105	0.0306918	0.00947636	0.063938
Q86VW0	SEC14 domain and spectrin repeat-containing protein 1	OID41786	SESTD1	1.95928	0.14479	0.0378168	0.00573255	0.741212
Q99963	Endophilin-A3	OID43073	SH3GL3	1.60559	-0.126395	0.034114	0.00399511	0.848042
O75563	Src kinase-associated phosphoprotein 2	OID44936	SKAP2	1.77939	-0.00106797	0.000504022	8.55724e-06	0.999931
P53814	Smoothelin	OID44264	SMTN	1.30045	0.0305751	0.00442423	0.000203913	0.848529
A6NMZ2	Sentan	OID40610	SNTN	6.55474	0.426066	0.0137361	0.00132711	0.612005
Q96KW9	Sperm acrosome-associated protein 7	OID40613	SPACA7	2.13925	0.716697	0.0165617	0.00589748	0.140368
Q496A3	Spermatogenesis-associated serine-rich protein 1	OID41853	SPATS1	-6.56222	-0.603405	0.0158088	0.00171064	0.454346
Q9HCB6	Spondin-1	OID44956	SPON1	-0.347161	-0.0611593	0.0161233	0.00222702	0.153107
Q92783	Signal transducing adapter molecule 1	OID44286	STAM	1.32343	0.121852	0.0196476	0.00241135	0.507685
O15400	Syntaxin-7	OID44293	STX7	0.442816	0.0538124	0.0236005	0.00334743	0.392411
Q9NUY8	TBC1 domain family member 23	OID44308	TBC1D23	1.23977	0.00796578	0.00086975	2.66521e-05	0.955309
Q99426	Tubulin-folding cofactor B	OID44310	TBCB	1.70576	-0.0440002	0.000403918	6.07034e-07	0.254136
Q9Y458	T-box transcription factor TBX22	OID40649	TBX22	-7.4564	0.34925	0.00222615	7.80769e-05	0.350667
Q5JTD0	Tight junction-associated protein 1	OID44984	TJAP1	1.82333	0.247755	0.00368874	0.000226516	0.0615164
P28908	Tumor necrosis factor receptor superfamily member 8	OID44991	TNFRSF8	-0.21484	0.00277437	0.0287571	0.0032405	0.986324
Q9Y275	Tumor necrosis factor ligand superfamily member 13B	OID45285	TNFSF13B	-0.211474	-0.0386427	0.022293	0.0036344	0.189378
O43557	Tumor necrosis factor ligand superfamily member 14	OID44348	TNFSF14	0.815457	0.0733814	0.0126488	0.0012264	0.411068
Q9UPV9	Trafficking kinesin-binding protein 1	OID43234	TRAK1	1.57494	0.235455	0.0471285	0.00962487	0.440137
Q9H0U9	Testis-specific Y-encoded-like protein 1	OID44367	TSPYL1	1.2713	-0.00688116	0.046901	0.00623061	0.998437
Q99614	Tetratricopeptide repeat protein 1	OID43250	TTC1	0.800576	0.0810063	0.0483966	0.00893729	0.645841
Q8NBS9	Thioredoxin domain-containing protein 5	OID45003	TXNDC5	0.985813	0.152052	0.0105335	0.00109829	0.135014
Q8IYU4	Ubiquilin-like protein	OID41989	UBQLNL	-0.407684	-0.00111033	0.0410302	0.00536611	0.999559
Q9P2D8	Protein unc-79 homolog	OID43271	UNC79	1.64919	0.220784	0.0178726	0.00235933	0.287408
Q96K76	Ubiquitin carboxyl-terminal hydrolase 47	OID43274	USP47	1.77979	0.0789075	0.017676	0.00182928	0.814331
Q9P1Q0	Vacuolar protein sorting-associated protein 54	OID42013	VPS54	1.37429	0.0468744	0.0151984	0.0013905	0.867422
Q96AJ9	Vesicle transport through interaction with t-SNAREs homolog 1A	OID45017	VTI1A	0.954447	0.216558	0.017676	0.00301655	0.0976965
Q9P202	Whirlin	OID40714	WHRN	-6.58791	0.230024	0.0136144	0.00105442	0.840444
P07947	Tyrosine-protein kinase Yes	OID44419	YES1	-1.39375	-0.428535	0.00731577	0.00166488	0.0895946
O60481	Zinc finger protein ZIC 3	OID42054	ZIC3	5.92942	0.0326474	0.00413225	0.000177324	0.989749
