# Supplementary material for: Impact of Delayed Biospecimen Processing on Serum Proteomics in Samples from a Parabolic Flight
Source: Research Square preprint supplement (doi:10.21203/rs.3.rs-7530087/v1), 2025-09-24
Supplement: Supplementary file 3 [file 3381ac2c35dd870cd55a73a4.xlsx]

## Sheet: Table S7
Supplemental Table 7. Proteins identified as stable within the top 30 pathways through ShinyGO analysis at 24h, are no longer present at 48h.
Glossary of terms
Pathway	The biochemical pathway name
Gene Name	The name of the gene that encodes the protein
Pathway	Gene Name
Path:hsa04060 Cytokine-cytokine receptor interaction	IL1R1
Path:hsa04151 PI3K-Akt signaling pathway	VEGFA	EFNA4	IGF1R
Path:hsa04514 Cell adhesion molecules	F11R
Path:hsa04610 Complement and coagulation cascades	MASP1	F2
Path:hsa04640 Hematopoietic cell lineage	IL1R1
Path:hsa04015 Rap1 signaling pathway	VEGFA	EFNA4	IGF1R
Path:hsa05200 Pathways in cancer	VEGFA	F2	IGF1R
Path:hsa04010 MAPK signaling pathway	VEGFA	IL1R1	EFNA4	IGF1R
Path:hsa04014 Ras signaling pathway	VEGFA	EFNA4	IGF1R
Path:hsa05418 Fluid shear stress and atherosclerosis	VEGFA	IL1R1
Path:hsa04510 Focal adhesion	VEGFA	IGF1R
Path:hsa05205 Proteoglycans in cancer	VEGFA	IGF1R
Path:hsa05323 Rheumatoid arthritis	VEGFA
Path:hsa04380 Osteoclast differentiation	IL1R1
Path:hsa04066 HIF-1 signaling pathway	VEGFA	IGF1R
Path:hsa04810 Regulation of actin cytoskeleton	F2
Path:hsa01521 EGFR tyrosine kinase inhibitor resistance	VEGFA	IGF1R
Path:hsa04064 NF-kappa B signaling pathway	IL1R1
