# Supplementary material for: Impact of Delayed Biospecimen Processing on Serum Proteomics in Samples from a Parabolic Flight
Source: Research Square preprint supplement (doi:10.21203/rs.3.rs-7530087/v1), 2025-09-24
Supplement: Supplementary file 4 [file 34e170d6b2e97565931f7535.xlsx]

## Sheet: Table S4
Supplemental Table 4. Group 4: Stable proteome at 24h and not stable at 48h.
Glossary of terms
UniProt ID	A unique identifier assigned by the UniProt database to a specific protein
Protein name	The common or scientific name of the protein associated with the UniProt ID
OlinkID	Identifier used by Olink Proteomics for a specific protein assay in OLINK Explore HT panel
Gene Name	The name of the gene that encodes the protein
NPX difference From0to24h	The change in NPX (Normalized Protein eXpression) values between 0 and 24h. NPX is a relative quantification metric used in Olink assays.
NPX difference From24to48h	The change in NPX values between 24 and 48h
Adjusted_pval in lmer results	The adjusted p-value from a linear mixed-effects model (lmer), accounting for multiple testing. Used to assess statistical significance of protein expression changes over time.
From0to24h, Adjusted pvalue in post hoc	Adjusted p-value from post hoc analysis comparing 0 to 24h. Indicates whether the change is statistically significant after correction.
From24to48h, Adjusted pvalue in post hoc	Adjusted p-value from post hoc analysis comparing 24 to 48h.
UniProt ID	Protein name	OlinkID	Gene Name	NPX difference From0to24h	NPX difference From24to48h	Adjusted_pval in lmer results	From0to24h, Adjusted pvalue in post hoc	From24to48h, Adjusted pvalue in post hoc
O75077	Disintegrin and metalloproteinase domain-containing protein 23	OID43329	ADAM23	0.0202714	0.12255	0.0499748	0.814954	0.00875777
Q8N157	Jouberin	OID40008	AHI1	-0.383393	0.745083	0.0483966	0.269502	0.00555886
P23352	Anosmin-1	OID40804	ANOS1	-0.190504	-1.02885	0.0355926	0.723678	0.00585158
O14791	Apolipoprotein L1	OID45312	APOL1	-0.00425868	0.206269	0.0381209	0.995518	0.00506189
Q13508	Ecto-ADP-ribosyltransferase 3	OID45314	ART3	0.0561347	0.205003	0.0193724	0.402156	0.00268044
O43505	Beta-1,4-glucuronyltransferase 1	OID45038	B4GAT1	0.113787	0.0974472	0.0451451	0.0591845	0.0230048
Q8WTQ4	Uncharacterized protein C16orf78	OID40884	C16orf78	0.00650991	-0.2539	0.0151984	0.985816	0.00157387
P35218	Carbonic anhydrase 5A, mitochondrial	OID42206	CA5A	0.0123239	0.0812535	0.0498498	0.839297	0.00849679
O00257	E3 SUMO-protein ligase CBX4	OID40929	CBX4	-0.503651	-0.959124	0.0126488	0.0782901	0.00179098
Q7Z692	Carcinoembryonic antigen-related cell adhesion molecule 19	OID43513	CEACAM19	-0.0967754	0.179015	0.0178726	0.0632477	0.00145114
Q6ZVT6	Protein CFAP20DC	OID40109	CFAP20DC	1.61507	4.11262	0.0364347	0.509664	0.00997624
P50461	Cysteine and glycine-rich protein 3	OID43575	CSRP3	-0.638546	-0.783349	0.0362726	0.166404	0.0212292
Q9H114	Cystatin-like 1	OID40135	CSTL1	-0.203787	-0.384059	0.0410302	0.235852	0.0104213
P07858	Cathepsin B	OID45099	CTSB	0.0932763	0.129894	0.0418746	0.140031	0.0123663
P60022	Beta-defensin 1	OID45105	DEFB1	-0.0305082	0.146341	0.0366855	0.756856	0.00421888
Q16760	Diacylglycerol kinase delta	OID41095	DGKD	0.00335953	0.257216	0.00726015	0.993562	0.000438466
Q6PKH6	Dehydrogenase/reductase SDR family member 4-like 2	OID43608	DHRS4L2	0.189345	0.360657	0.0321051	0.196103	0.00655907
Q9C0G6	Dynein axonemal heavy chain 6	OID41110	DNAH6	0.161016	-0.709601	0.0251683	0.50114	0.00293913
Q9UKB3	DnaJ homolog subfamily C member 12	OID41115	DNAJC12	-1.13028	1.57397	0.0442053	0.0745743	0.00573091
Q07507	Dermatopontin	OID45109	DPT	-0.0784283	-0.452079	0.0198581	0.653056	0.00238569
Q16610	Extracellular matrix protein 1	OID45460	ECM1	-0.0591033	-0.284788	0.0101063	0.402299	0.000865916
Q5T9C2	Protein FAM102A	OID41180	EEIG1	0.104383	-0.38972	0.0109856	0.232152	0.00069651
P52798	Ephrin-A4	OID43658	EFNA4	-0.160729	0.193479	0.046901	0.0555971	0.00624732
Q92817	Envoplakin	OID42432	EVPL	0.454868	0.709043	0.0270656	0.0697558	0.0115888
Q9Y624	Junctional adhesion molecule A	OID45120	F11R	-0.0345952	0.0929338	0.0460199	0.350035	0.00562327
P00734	Prothrombin	OID45463	F2	-0.484083	-1.09464	0.0483966	0.35576	0.0113869
Q9BQN1	Protein FAM83C	OID40230	FAM83C	0.345948	4.73638	0.00010338	0.560814	3.20009e-07
O95633	Follistatin-related protein 3	OID44663	FSTL3	-0.000243907	-0.0478818	0.00296383	0.998021	0.000122085
O95166	Gamma-aminobutyric acid receptor-associated protein	OID43734	GABARAP	-0.218572	0.941079	0.0347816	0.567717	0.00395644
O60609	GDNF family receptor alpha-3	OID43748	GFRA3	0.141962	-0.237727	0.0297033	0.077544	0.00320055
P08069	Insulin-like growth factor 1 receptor	OID43837	IGF1R	-0.0705288	0.321451	0.0398657	0.629732	0.00483458
P14778	Interleukin-1 receptor type 1	OID45156	IL1R1	0.0168332	0.0528092	0.013782	0.253777	0.00159019
Q8N309	Leucine-rich repeat-containing protein 43	OID40376	LRRC43	0.326655	4.63719	0.000403918	0.204256	0
P48740	Mannan-binding lectin serine protease 1	OID43960	MASP1	0.0107571	0.194333	0.017676	0.946095	0.00182286
Q86XN8	RNA-binding protein MEX3D	OID41469	MEX3D	-0.0615098	0.792865	0.00210146	0.856032	6.26359e-05
Q13421	Mesothelin	OID43991	MSLN	0.168539	0.35393	0.0178243	0.139914	0.00319166
Q86UE4	Protein LYRIC	OID43993	MTDH	0.188825	-0.563264	0.0499748	0.418841	0.00744942
Q12769	Nuclear pore complex protein Nup160	OID40474	NUP160	-0.295195	-0.400861	0.0194572	0.130591	0.00856419
Q9HCM2	Plexin-A4	OID44104	PLXNA4	0.0756883	0.396569	0.0046948	0.293492	0.000295449
Q8ND90	Paraneoplastic antigen Ma1	OID42922	PNMA1	-0.550761	2.12561	0.0447898	0.679079	0.00539372
Q6NYC8	Phostensin	OID44118	PPP1R18	-0.188957	-0.645599	0.0410921	0.534654	0.00781801
Q9NRG1	Phosphoribosyltransferase domain-containing protein 1	OID42956	PRTFDC1	0.42872	-0.821652	0.0233203	0.0844354	0.00240374
Q8NE09	Regulator of G-protein signaling 22	OID40560	RGS22	-0.143156	-1.15376	0.0436948	0.866754	0.0094754
P57078	Receptor-interacting serine/threonine-protein kinase 4	OID43015	RIPK4	0.515666	0.884683	0.0460199	0.21271	0.0141809
Q9NP59	Solute carrier family 40 member 1	OID43095	SLC40A1	-0.107614	0.283748	0.0339387	0.27464	0.00360067
P08294	Extracellular superoxide dismutase [Cu-Zn]	OID45413	SOD3	0.0140221	0.129523	0.00210146	0.408366	8.42846e-05
Q5M775	Cytospin-B	OID40619	SPECC1	-0.302823	-0.257102	0.0471791	0.0614796	0.0249718
Q05066	Sex-determining region Y protein	OID41868	SRY	-0.0915915	-0.175814	0.0233357	0.149763	0.00436765
O43493	Trans-Golgi network integral membrane protein 2	OID45422	TGOLN2	0.107611	0.232542	0.0355926	0.262466	0.00815232
P16035	Metalloproteinase inhibitor 2	OID44981	TIMP2	-0.344188	0.441421	0.0396073	0.0538056	0.00480955
P98066	Tumor necrosis factor-inducible gene 6 protein	OID44337	TNFAIP6	0.0124609	0.229068	0.0258303	0.960168	0.00303102
Q5JTV8	Torsin-1A-interacting protein 1	OID44354	TOR1AIP1	-0.298644	-0.862115	0.021108	0.298482	0.0031359
Q96J42	Thioredoxin domain-containing protein 15	OID45002	TXNDC15	-0.0797914	-0.318902	0.0195461	0.455336	0.00265092
Q92890	Ubiquitin recognition factor in ER-associated degradation protein 1	OID44375	UFD1	0.159599	-0.351074	0.0451451	0.237671	0.00546546
P15692	Vascular endothelial growth factor A	OID44389	VEGFA	0.05221	0.253207	0.0404814	0.703046	0.0066998
O15391	Transcription factor YY2	OID42038	YY2	0.3689	-0.844347	0.0377728	0.211535	0.0049263
Q96T25	Zinc finger protein ZIC 5	OID40739	ZIC5	0.547936	-5.22833	1.55811e-05	0.110343	2.18613e-08
Q9UDV7	Zinc finger protein 282	OID42061	ZNF282	0.0026728	-0.113868	0.00492309	0.973263	0.000262993
P04217	Alpha-1B-glycoprotein	OID45433	A1BG	0.0913	0.1803	0.97625
Q6PD74	Alpha- and gamma-adaptin-binding protein p34	OID40752	AAGAB	1.1287	0.1698	0.122913
Q9H7C9	Mth938 domain-containing protein	OID43311	AAMDC	1.4303	0.1232	0.389288
Q9BTE6	Alanyl-tRNA editing protein Aarsd1	OID43312	AARSD1	0.7834	0.0291	0.389288
Q4L235	Beta-alanine-activating enzyme	OID40753	AASDH	0.4851	-0.5267	0.123314
Q9BZC7	ATP-binding cassette sub-family A member 2	OID42080	ABCA2	0.9187	-2.986	0.267396
Q96I13	Protein ABHD8	OID40003	ABHD8	-2.7388	-1.6548	0.052914
Q7Z7G0	Target of Nesh-SH3	OID43314	ABI3BP	-0.0739	-0.0157	0.389684
P00519	Tyrosine-protein kinase ABL1	OID43315	ABL1	0.3193	0.2214	0.389689
Q8N0Z2	Actin-binding Rho-activating protein	OID40759	ABRA	-2.3177	1.9762	0.123394
P09110	3-ketoacyl-CoA thiolase, peroxisomal	OID42082	ACAA1	0.0653	0.3704	0.267396
P45954	Short/branched chain specific acyl-CoA dehydrogenase, mitochondrial	OID44433	ACADSB	0.015	-0.1323	0.662952
P16112	Aggrecan core protein	OID44434	ACAN	0.0123	-0.0621	0.662952
Q9BYF1	Angiotensin-converting enzyme 2	OID43317	ACE2	-0.0199	-0.2235	0.389689
P22303	Acetylcholinesterase	OID44435	ACHE	0.0374	0.1772	0.664316
Q8WYK0	Acetyl-coenzyme A thioesterase	OID40762	ACOT12	-2.5499	2.2886	0.124138
Q9NPJ3	Acyl-coenzyme A thioesterase 13	OID43318	ACOT13	-0.3757	0.7583	0.389689
P24666	Low molecular weight phosphotyrosine protein phosphatase	OID43319	ACP1	1.6664	-0.1414	0.389796
P13686	Tartrate-resistant acid phosphatase type 5	OID45022	ACP5	0.0166	-0.0138	0.8148
Q9NPH0	Lysophosphatidic acid phosphatase type 6	OID43320	ACP6	0.106	0.1142	0.389922
P26436	Acrosomal protein SP-10	OID43322	ACRV1	0.0676	0.0389	0.390122
Q08AH1	Acyl-coenzyme A synthetase ACSM1, mitochondrial	OID40763	ACSM1	-0.3888	0.2337	0.124375
P62736	Actin, aortic smooth muscle	OID43323	ACTA2	1.1601	0.2174	0.390339
P63267	Actin, gamma-enteric smooth muscle	OID42086	ACTG2	0.4983	-0.0344	0.268198
P35609	Alpha-actinin-2	OID43324	ACTN2	-0.2774	0.0918	0.390385
P37023	Serine/threonine-protein kinase receptor R3	OID43325	ACVRL1	-0.0472	0.1756	0.390385
Q03154	Aminoacylase-1	OID44437	ACY1	0.0122	0.0249	0.664659
Q96HD9	N-acyl-aromatic-L-amino acid amidohydrolase	OID42088	ACY3	-0.0178	0.0261	0.268199
P07311	Acylphosphatase-1	OID44438	ACYP1	1.0713	0.1793	0.664659
P00813	Adenosine deaminase	OID43326	ADA	0.4466	0.2916	0.390535
Q9NZK5	Adenosine deaminase 2	OID45301	ADA2	-0.0631	0.0258	0.926172
O43184	Disintegrin and metalloproteinase domain-containing protein 12	OID42089	ADAM12	0.0479	0.3966	0.268993
Q13444	Disintegrin and metalloproteinase domain-containing protein 15	OID43327	ADAM15	-0.015	0.0691	0.390535
Q9P0K1	Disintegrin and metalloproteinase domain-containing protein 22	OID43328	ADAM22	-0.4836	0.0684	0.390592
P78325	Disintegrin and metalloproteinase domain-containing protein 8	OID44439	ADAM8	0.2154	0.0821	0.664659
Q76LX8	A disintegrin and metalloproteinase with thrombospondin motifs 13	OID45023	ADAMTS13	-0.0117	-0.0137	0.816218
Q8TE58	A disintegrin and metalloproteinase with thrombospondin motifs 15	OID43332	ADAMTS15	-0.333	-0.0573	0.390668
O75173	A disintegrin and metalloproteinase with thrombospondin motifs 4	OID42090	ADAMTS4	-0.0141	1.5324	0.270631
Q9UP79	A disintegrin and metalloproteinase with thrombospondin motifs 8	OID44440	ADAMTS8	-0.0579	-0.0729	0.665821
Q86TH1	ADAMTS-like protein 2	OID45024	ADAMTSL2	-0.0034	0.0136	0.816974
Q6ZMM2	ADAMTS-like protein 5	OID44441	ADAMTSL5	-0.1579	0.2736	0.665821
O60266	Adenylate cyclase type 3	OID40765	ADCY3	0.0142	-0.1363	0.125704
P35611	Alpha-adducin	OID44442	ADD1	0.6913	-0.2845	0.665821
P35612	Beta-adducin	OID44443	ADD2	1.3514	-0.0259	0.665821
Q8N7X0	Androglobin	OID40767	ADGB	1.1428	-4.2354	0.126364
O14514	Adhesion G protein-coupled receptor B1	OID43334	ADGRB1	-0.4177	-0.0588	0.392457
Q6QNK2	Adhesion G-protein coupled receptor D1	OID44444	ADGRD1	-0.1293	-0.0336	0.665821
Q14246	Adhesion G protein-coupled receptor E1	OID43336	ADGRE1	0.0833	-0.0966	0.393753
Q9UHX3	Adhesion G protein-coupled receptor E2	OID44445	ADGRE2	-0.0381	-0.017	0.665821
Q9BY15	Adhesion G protein-coupled receptor E3	OID43337	ADGRE3	0.3464	0.2865	0.394729
P48960	Adhesion G protein-coupled receptor E5	OID45025	ADGRE5	0.1012	-0.0251	0.816974
Q8IZF7	Adhesion G-protein coupled receptor F2	OID40006	ADGRF2	0.2498	-0.5658	0.052914
Q8IZF2	Adhesion G protein-coupled receptor F5	OID44446	ADGRF5	0.3619	-0.0227	0.665821
Q9Y653	Adhesion G-protein coupled receptor G1	OID43338	ADGRG1	-0.1553	0.0662	0.396345
Q8IZP9	Adhesion G-protein coupled receptor G2	OID44447	ADGRG2	-0.1553	0.0547	0.665821
Q86Y34	Adhesion G protein-coupled receptor G3	OID42092	ADGRG3	1.0915	0.143	0.271249
P00325	All-trans-retinol dehydrogenase [NAD(+)] ADH1B	OID44448	ADH1B	0.1849	0.3	0.665821
P08319	All-trans-retinol dehydrogenase [NAD(+)] ADH4	OID40770	ADH4	-0.0239	-0.1446	0.12664
P35318	Pro-adrenomedullin	OID43339	ADM	-0.6312	-0.4993	0.396345
P30566	Adenylosuccinate lyase	OID43340	ADSL	0.7934	-0.0049	0.39746
Q8TED9	Actin filament-associated protein 1-like 1	OID43341	AFAP1L1	-0.202	0.3403	0.397874
P43652	Afamin	OID45434	AFM	-0.0455	0.2582	0.976373
P02771	Alpha-fetoprotein	OID45026	AFP	0.1023	0.2583	0.816974
Q96P47	Arf-GAP with GTPase, ANK repeat and PH domain-containing protein 3	OID42097	AGAP3	0.3283	-0.1979	0.271249
Q15109	Advanced glycosylation end product-specific receptor	OID44451	AGER	-0.1023	0.1074	0.665821
Q8TD06	Anterior gradient protein 3	OID42098	AGR3	-0.3093	-0.3157	0.271249
O00468	Agrin	OID44452	AGRN	0.0164	0.0131	0.666655
O00253	Agouti-related protein	OID43344	AGRP	-0.6715	-0.1198	0.39807
P21549	Alanine--glyoxylate aminotransferase	OID44453	AGXT	-0.1901	0.0294	0.667423
P23526	Adenosylhomocysteinase	OID44454	AHCY	0.0615	0.2452	0.66781
Q09666	Neuroblast differentiation-associated protein AHNAK	OID43345	AHNAK	-0.1412	0.13	0.39807
Q8IVF2	Protein AHNAK2	OID43346	AHNAK2	-0.1811	0.2306	0.398358
Q719I0	Putative activator of 90 kDa heat shock protein ATPase homolog 2	OID40775	AHSA2P	-0.4246	-0.2823	0.126721
P02765	Alpha-2-HS-glycoprotein	OID45303	AHSG	0.1038	0.0974	0.926172
Q9NZD4	Alpha-hemoglobin-stabilizing protein	OID45027	AHSP	1.0525	0.2424	0.816974
O95831	Apoptosis-inducing factor 1, mitochondrial	OID43349	AIFM1	-0.5796	0.4033	0.399882
P00568	Adenylate kinase isoenzyme 1	OID44455	AK1	1.841	0.1109	0.66781
P54819	Adenylate kinase 2, mitochondrial	OID43350	AK2	-0.076	0.4128	0.400192
Q9UKA4	A-kinase anchor protein 11	OID42101	AKAP11	-0.0022	-0.0286	0.271249
Q02952	A-kinase anchor protein 12	OID44456	AKAP12	0.1139	-0.0894	0.66781
Q12802	A-kinase anchor protein 13	OID40778	AKAP13	-0.5996	0.3156	0.126891
Q9Y2D5	A-kinase anchor protein 2	OID43351	AKAP2	-0.0006	-0.0423	0.400192
O43823	A-kinase anchor protein 8	OID40781	AKAP8	-0.0353	-0.5276	0.126891
Q5T1N1	Protein AKNAD1	OID42102	AKNAD1	0.5814	-0.1234	0.271263
O60218	Aldo-keto reductase family 1 member B10	OID42104	AKR1B10	2.0192	2.2704	0.271763
Q8NHP1	Aflatoxin B1 aldehyde reductase member 4	OID42106	AKR7L	0.2219	0.0859	0.271763
Q96B36	Proline-rich AKT1 substrate 1	OID43352	AKT1S1	0.2088	0.1128	0.400192
P31751	RAC-beta serine/threonine-protein kinase	OID43353	AKT2	0.1134	-0.2494	0.400388
Q13740	CD166 antigen	OID45028	ALCAM	0.0624	0.0971	0.819767
P00352	Aldehyde dehydrogenase 1A1	OID45029	ALDH1A1	0.4028	0.0828	0.81977
O75891	Cytosolic 10-formyltetrahydrofolate dehydrogenase	OID40785	ALDH1L1	0.1732	0.0303	0.126891
P05091	Aldehyde dehydrogenase, mitochondrial	OID43354	ALDH2	-0.1308	0.3888	0.400388
P30838	Aldehyde dehydrogenase, dimeric NADP-preferring	OID43355	ALDH3A1	0.126	0.443	0.400914
P49189	4-trimethylaminobutyraldehyde dehydrogenase	OID42108	ALDH9A1	0.5566	0.2318	0.272551
Q9UM73	ALK tyrosine kinase receptor	OID40786	ALK	0.2385	-0.2149	0.126891
P10696	Alkaline phosphatase, germ cell type	OID44457	ALPG	0.0412	0.0331	0.66781
P09923	Intestinal-type alkaline phosphatase	OID42110	ALPI	0.024	0.1649	0.272551
P05187	Alkaline phosphatase, placental type	OID43357	ALPP	-0.1347	0.1199	0.402004
Q86V81	THO complex subunit 4	OID40787	ALYREF	0.6157	-0.5893	0.130087
P02760	Protein AMBP	OID43358	AMBP	-0.1259	0.0509	0.402004
Q96NU7	Probable imidazolonepropionase	OID43359	AMDHD1	-0.3894	-0.0824	0.402004
Q86SJ2	Amphoterin-induced protein 2	OID43360	AMIGO2	-0.0723	0.0387	0.402004
Q9BXJ7	Protein amnionless	OID42114	AMN	-0.2856	-0.0964	0.272551
Q01432	AMP deaminase 3	OID43361	AMPD3	-0.0929	-0.1796	0.404489
P03950	Angiogenin	OID45305	ANG	-0.0257	-0.0489	0.926229
Q15389	Angiopoietin-1	OID44459	ANGPT1	-0.1216	-0.0632	0.669493
O15123	Angiopoietin-2	OID43362	ANGPT2	-0.1947	0.0828	0.405026
O95841	Angiopoietin-related protein 1	OID44460	ANGPTL1	-0.0607	-0.0951	0.670867
Q9UKU9	Angiopoietin-related protein 2	OID44461	ANGPTL2	-0.0274	-0.0415	0.670896
Q9Y5C1	Angiopoietin-related protein 3	OID45306	ANGPTL3	0.0764	0.079	0.926653
Q9BY76	Angiopoietin-related protein 4	OID44462	ANGPTL4	-0.0964	-0.0461	0.670896
Q9P2G1	Ankyrin repeat and IBR domain-containing protein 1	OID40792	ANKIB1	-0.2292	0.3881	0.130246
Q8IV38	Ankyrin repeat and MYND domain-containing protein 2	OID43364	ANKMY2	0.4486	0.0527	0.406003
Q6UB99	Ankyrin repeat domain-containing protein 11	OID42118	ANKRD11	0.2118	-0.083	0.272665
Q5TYW2	Ankyrin repeat domain-containing protein 20A1	OID40014	ANKRD20A1	-2.6351	-1.88	0.0531965
A5PLL1	Ankyrin repeat domain-containing protein 34B	OID40017	ANKRD34B	0.0444	0.3124	0.0531965
Q8N283	Ankyrin repeat domain-containing protein 35	OID42119	ANKRD35	0.913	0.2689	0.273051
Q8N2N9	Ankyrin repeat domain-containing protein 36B	OID40798	ANKRD36B	-2.0516	-0.6606	0.130246
Q5TZF3	Ankyrin repeat domain-containing protein 45	OID40020	ANKRD45	-0.7196	-0.3574	0.0533727
Q9ULJ7	Ankyrin repeat domain-containing protein 50	OID40799	ANKRD50	0.2858	-0.6385	0.130385
Q8N9V6	Ankyrin repeat domain-containing protein 53	OID42120	ANKRD53	-0.1245	-0.1294	0.2732
Q6NXT1	Ankyrin repeat domain-containing protein 54	OID42121	ANKRD54	0.0565	-0.0434	0.274206
Q3KP44	Ankyrin repeat domain-containing protein 55	OID42122	ANKRD55	0.1753	-0.0849	0.274206
Q92625	Ankyrin repeat and SAM domain-containing protein 1A	OID40801	ANKS1A	0.32	-0.0898	0.131047
Q6ZW76	Ankyrin repeat and SAM domain-containing protein 3	OID40802	ANKS3	-0.0539	0.0341	0.131145
A6NFN9	Protein ANKUB1	OID40803	ANKUB1	-0.7503	-0.0988	0.131588
Q9H8Y5	Ankyrin repeat and zinc finger domain-containing protein 1	OID43365	ANKZF1	0.086	-0.2465	0.406003
Q9NQW6	Anillin	OID40021	ANLN	-1.0153	-0.2121	0.0540543
Q9BTT0	Acidic leucine-rich nuclear phosphoprotein 32 family member E	OID42124	ANP32E	0.9552	-0.185	0.274248
P15144	Aminopeptidase N	OID45307	ANPEP	0.2247	0.1591	0.926653
Q9UJ72	Annexin A10	OID43367	ANXA10	-0.0111	-0.0632	0.406003
P50995	Annexin A11	OID43368	ANXA11	0.133	-0.1936	0.407228
P07355	Annexin A2	OID43369	ANXA2	0.3728	0.2321	0.407941
P12429	Annexin A3	OID44464	ANXA3	0.2626	-0.234	0.670896
P09525	Annexin A4	OID44465	ANXA4	0.7612	0.0497	0.670896
P08758	Annexin A5	OID42125	ANXA5	-1.9447	1.9888	0.274577
P08133	Annexin A6	OID40805	ANXA6	0.6165	-2.3136	0.131588
Q16853	Membrane primary amine oxidase	OID45308	AOC3	-0.0263	0.1538	0.926653
Q7Z5R6	Amyloid beta A4 precursor protein-binding family B member 1-interacting protein	OID43372	APBB1IP	0.3636	-0.3807	0.408788
P02743	Serum amyloid P-component	OID45435	APCS	-0.057	0.1094	0.978708
P27695	DNA-(apurinic or apyrimidinic site) endonuclease	OID43373	APEX1	0.3941	-0.1356	0.408788
Q9UBZ4	DNA-(apurinic or apyrimidinic site) endonuclease 2	OID40023	APEX2	1.2954	-0.8947	0.0540543
Q96GX9	Methylthioribulose-1-phosphate dehydratase	OID43374	APIP	-0.0259	0.2792	0.409122
P51693	Amyloid beta precursor like protein 1	OID44466	APLP1	-0.0071	-0.0466	0.671227
P02647	Apolipoprotein A-I	OID45436	APOA1	0.0032	0.0714	0.978708
P02652	Apolipoprotein A-II	OID45309	APOA2	0.351	0.2052	0.926705
P06727	Apolipoprotein A-IV	OID45437	APOA4	0.0016	-0.0024	0.979619
Q0VD83	Apolipoprotein B receptor	OID44467	APOBR	-0.0542	0.0749	0.671227
P05090	Apolipoprotein D	OID45438	APOD	-0.4132	0.1764	0.979619
P02649	Apolipoprotein E	OID45439	APOE	-0.0563	-0.077	0.981484
Q13790	Apolipoprotein F	OID45311	APOF	0.0021	0.0693	0.926705
P02749	Beta-2-glycoprotein 1	OID45033	APOH	-0.2186	0.1003	0.820392
O95445	Apolipoprotein M	OID45313	APOM	-0.0411	0.2136	0.926952
P05067	Amyloid-beta precursor protein	OID45034	APP	-0.0251	0.0687	0.821252
P07741	Adenine phosphoribosyltransferase	OID43375	APRT	1.1343	-0.054	0.409327
P29972	Aquaporin-1	OID40027	AQP1	-8.2961	2.1475	0.0540543
P15514	Amphiregulin	OID43376	AREG	0.56	0.5712	0.410083
O15033	Apoptosis-resistant E3 ubiquitin protein ligase 1	OID40028	AREL1	-2.7033	-1.9771	0.0540543
Q9Y6D5	Brefeldin A-inhibited guanine nucleotide-exchange protein 2	OID40029	ARFGEF2	-0.1135	-0.1856	0.0540543
P05089	Arginase-1	OID43379	ARG1	0.3507	-0.0285	0.412164
P78540	Arginase-2, mitochondrial	OID42132	ARG2	-0.26	-0.1787	0.274577
A1A4S6	Rho GTPase-activating protein 10	OID40810	ARHGAP10	0.5349	-0.1994	0.131588
Q68EM7	Rho GTPase-activating protein 17	OID40812	ARHGAP17	-0.7902	0.2675	0.131725
Q8N264	Rho GTPase-activating protein 24	OID40813	ARHGAP24	0.0338	-0.0606	0.131725
P42331	Rho GTPase-activating protein 25	OID42135	ARHGAP25	0.1831	-0.1442	0.274577
Q6ZUM4	Rho GTPase-activating protein 27	OID43380	ARHGAP27	0.6234	0.2101	0.412164
A6NI28	Rho GTPase-activating protein 42	OID40816	ARHGAP42	1.5085	-1.637	0.131725
Q92888	Rho guanine nucleotide exchange factor 1	OID43382	ARHGEF1	-0.0309	-0.4827	0.412164
Q9NZN5	Rho guanine nucleotide exchange factor 12	OID43384	ARHGEF12	0.2813	-0.5038	0.412773
O94989	Rho guanine nucleotide exchange factor 15	OID40817	ARHGEF15	-0.5877	-3.9848	0.132309
Q92974	Rho guanine nucleotide exchange factor 2	OID40819	ARHGEF2	-0.4604	-0.0069	0.132403
A8MVX0	Rho guanine nucleotide exchange factor 33	OID40031	ARHGEF33	-1.1609	-0.7692	0.0542134
Q9NXL2	Rho guanine nucleotide exchange factor 38	OID40821	ARHGEF38	-0.6507	-0.0284	0.133332
Q12774	Rho guanine nucleotide exchange factor 5	OID42137	ARHGEF5	0.3861	0.0065	0.274577
Q4LE39	AT-rich interactive domain-containing protein 4B	OID42140	ARID4B	0.1829	0.1029	0.276081
Q03989	AT-rich interactive domain-containing protein 5A	OID40822	ARID5A	2.2202	-0.5011	0.133666
Q96B23	Uncharacterized protein C18orf25	OID40890	ARK2N	0.7082	-0.2765	0.138662
Q8N8R7	ARL14 effector protein	OID40033	ARL14EP	1.4378	-0.4501	0.0544254
P0DKL9	ARL14 effector protein-like	OID40823	ARL14EPL	0.044	-0.5183	0.133666
Q7L311	Armadillo repeat-containing X-linked protein 2	OID42144	ARMCX2	3.9192	2.5925	0.276518
Q9UBL0	cAMP-regulated phosphoprotein 21	OID40034	ARPP21	6.6186	-2.3085	0.0549026
P36575	Arrestin-C	OID40035	ARR3	-0.4191	0.0726	0.0549026
P15848	Arylsulfatase B	OID43386	ARSB	0.289	0.1945	0.413624
Q93070	Ecto-ADP-ribosyltransferase 4	OID40826	ART4	0.0939	-0.4049	0.133666
O00192	Splicing regulator ARVCF	OID40036	ARVCF	5.992	-1.53	0.0552502
Q9NR71	Neutral ceramidase	OID43387	ASAH2	-0.3054	0.0868	0.413624
O43150	Arf-GAP with SH3 domain, ANK repeat and PH domain-containing protein 2	OID42148	ASAP2	1.0599	-0.0244	0.276518
Q8WXK1	Ankyrin repeat and SOCS box protein 15	OID40828	ASB15	-0.3489	-1.5859	0.133666
P07306	Asialoglycoprotein receptor 1	OID43389	ASGR1	-0.2451	0.1085	0.413624
P07307	Asialoglycoprotein receptor 2	OID45315	ASGR2	0.3596	0.2533	0.926952
Q9NR48	Histone-lysine N-methyltransferase ASH1L	OID40832	ASH1L	-0.8156	0.794	0.134772
Q9BXN1	Asporin	OID44470	ASPN	0.0261	0.0701	0.6763
Q9BZE9	Tether containing UBX domain for GLUT4	OID43390	ASPSCR1	0.6472	0.0501	0.413624
Q7L266	Isoaspartyl peptidase/L-asparaginase	OID43391	ASRGL1	0.2742	0.3691	0.413624
P00966	Argininosuccinate synthase	OID43392	ASS1	0.0051	-0.2323	0.41392
Q76L83	Putative Polycomb group protein ASXL2	OID40833	ASXL2	0.4782	-0.0257	0.13493
Q5T9A4	ATPase family AAA domain-containing protein 3B	OID42150	ATAD3B	0.0391	0.0498	0.277232
P18846	Cyclic AMP-dependent transcription factor ATF-1	OID40834	ATF1	0.4469	-0.2467	0.135045
P18847	Cyclic AMP-dependent transcription factor ATF-3	OID40042	ATF3	0.4253	2.5746	0.0556614
Q9H0Y0	Ubiquitin-like-conjugating enzyme ATG10	OID40836	ATG10	-0.6077	0.0291	0.135045
Q6ZNE5	Beclin 1-associated autophagy-related key regulator	OID40839	ATG14	2.2917	-1.2151	0.135045
Q676U5	Autophagy-related protein 16-1	OID43393	ATG16L1	0.7168	-0.0224	0.41392
Q8WYN0	Cysteine protease ATG4A	OID42153	ATG4A	1.581	-0.0405	0.27729
P30049	ATP synthase subunit delta, mitochondrial	OID42159	ATP5F1D	-1.3463	-1.6257	0.27729
Q9UII2	ATPase inhibitor, mitochondrial	OID44472	ATP5IF1	0.1394	0.3762	0.6763
Q6UW56	All-trans retinoic acid-induced differentiation factor	OID43397	ATRAID	-0.01	0.1377	0.41392
O75882	Attractin	OID45440	ATRN	0.1807	0.1863	0.981484
P46100	Transcriptional regulator ATRX	OID40044	ATRX	0.1025	-0.3509	0.0557598
Q99700	Ataxin-2	OID42165	ATXN2	-0.3054	-0.6611	0.27729
P54252	Ataxin-3	OID43398	ATXN3	0.0994	-0.2108	0.414142
O15265	Ataxin-7	OID40046	ATXN7	1.7049	0.7364	0.055848
Q5T6C5	Ataxin-7-like protein 2	OID40047	ATXN7L2	-2.2921	-0.1704	0.0560632
Q9H7T9	Aurora kinase A and ninein-interacting protein	OID40048	AUNIP	0.0478	0.2292	0.0560632
P30530	Tyrosine-protein kinase receptor UFO	OID45316	AXL	-0.0445	0.0648	0.927504
Q9H6S1	5-azacytidine-induced protein 2	OID43400	AZI2	0.0805	-0.1842	0.414894
Q8NFL0	UDP-GlcNAc:betaGal beta-1,3-N-acetylglucosaminyltransferase 7	OID43401	B3GNT7	0.0124	0.0156	0.419317
P15291	Beta-1,4-galactosyltransferase 1	OID44473	B4GALT1	-0.013	0.0339	0.676345
Q9NWV8	BRISC and BRCA1-A complex member 1	OID42168	BABAM1	-0.6726	-1.585	0.277779
O14867	Transcription regulator protein BACH1	OID43402	BACH1	-0.1877	-0.1655	0.420171
O95817	BAG family molecular chaperone regulator 3	OID43403	BAG3	-0.2053	-0.0146	0.420171
Q9UL15	BAG family molecular chaperone regulator 5	OID43404	BAG5	0.4068	0.1605	0.420319
P46379	Large proline-rich protein BAG6	OID43405	BAG6	0.3874	0.0654	0.42035
Q9UQB8	Brain-specific angiogenesis inhibitor 1-associated protein 2	OID42170	BAIAP2	0.2937	0.3438	0.278554
Q8N9N5	Protein BANP	OID40049	BANP	-0.0478	0.0208	0.0562074
Q8IXM2	Chromatin complexes subunit BAP18	OID43407	BAP18	0.2984	-0.0337	0.42035
Q16520	Basic leucine zipper transcriptional factor ATF-like	OID42174	BATF	0.1379	-1.3568	0.278554
P50895	Basal cell adhesion molecule	OID45039	BCAM	-0.1149	0.0238	0.821252
Q96GW7	Brevican core protein	OID43408	BCAN	-0.2492	0.1893	0.42035
P54687	Branched-chain-amino-acid aminotransferase, cytosolic	OID44474	BCAT1	0.238	-0.0007	0.677128
P06276	Cholinesterase	OID45317	BCHE	-0.1257	0.0745	0.927504
Q07817	Bcl-2-like protein 1	OID43410	BCL2L1	1.4701	-0.3745	0.420382
Q9HD36	Bcl-2-like protein 10	OID40854	BCL2L10	-1.3898	-1.6626	0.135045
Q5TBC7	Bcl-2-like protein 15	OID42177	BCL2L15	0.4585	0.036	0.279469
P11274	Breakpoint cluster region protein	OID43412	BCR	-0.1173	-0.3144	0.420382
P23560	Brain-derived neurotrophic factor	OID45040	BDNF	0.036	0.0966	0.822319
Q14457	Beclin-1	OID43413	BECN1	0.244	-0.331	0.420382
Q8NDZ0	BEN domain-containing protein 2	OID40858	BEND2	0.6014	-0.5743	0.135045
Q7L4P6	BEN domain-containing protein 5	OID40860	BEND5	6.2382	-2.2104	0.135908
P21810	Biglycan	OID42181	BGN	0.4437	-0.118	0.279469
Q7RTS1	Class A basic helix-loop-helix protein 15	OID40052	BHLHA15	0.5214	-0.0132	0.0564587
Q8TD16	Protein bicaudal D homolog 2	OID44475	BICD2	1.0782	0.2963	0.678595
Q6ZP65	BICD family-like cargo adapter 1	OID40054	BICDL1	-0.8156	-0.1467	0.0567829
Q6AI39	BRD4-interacting chromatin-remodeling complex-associated protein-like	OID40055	BICRAL	1.6251	-1.3032	0.0567829
Q13323	Bcl-2-interacting killer	OID40056	BIK	-0.6907	-1.7312	0.0571873
O00499	Myc box-dependent-interacting protein 1	OID40057	BIN1	-0.0724	-1.6585	0.0575844
Q9NQY0	Bridging integrator 3	OID42185	BIN3	0.1679	-0.0656	0.279671
Q13867	Bleomycin hydrolase	OID45043	BLMH	0.1917	0.0732	0.822721
Q6QNY0	Biogenesis of lysosome-related organelles complex 1 subunit 3	OID43415	BLOC1S3	0.7921	0.012	0.420382
A0JNW5	UHRF1-binding protein 1-like	OID43268	BLTP3B	0.6347	-0.314	0.387341
P53004	Biliverdin reductase A	OID42188	BLVRA	0.6124	0.3502	0.280028
P30043	Flavin reductase	OID45044	BLVRB	0.6103	0.1902	0.822726
O95393	Bone morphogenetic protein 10	OID44476	BMP10	-0.1276	0.2279	0.678919
Q8N8U9	BMP-binding endothelial regulator protein	OID44477	BMPER	-0.1817	-0.0589	0.678919
Q9BWV1	Brother of CDO	OID43420	BOC	0.0397	0.0483	0.420382
Q9Y3E2	BolA-like protein 1	OID42190	BOLA1	1.3461	0.0942	0.280743
Q9H3K6	BolA-like protein 2	OID43421	BOLA2	0.393	-0.287	0.420391
P17213	Bactericidal permeability-increasing protein	OID44479	BPI	1.0177	0.0307	0.678919
Q8TDL5	BPI fold-containing family B member 1	OID45045	BPIFB1	0.2479	0.1055	0.822932
Q8N4F0	BPI fold-containing family B member 2	OID44480	BPIFB2	0.0114	-0.0497	0.678919
Q7Z569	BRCA1-associated protein	OID43423	BRAP	0.2683	-0.0125	0.420391
Q15059	Bromodomain-containing protein 3	OID42193	BRD3	-0.0703	0.5322	0.280778
Q9BX63	Fanconi anemia group J protein	OID40870	BRIP1	0.3605	-1.3037	0.136829
Q8WUW1	Protein BRICK1	OID43425	BRK1	0.0808	0.3084	0.421865
P55201	Peregrin	OID40066	BRPF1	-1.0407	-1.8006	0.0579609
P35613	Basigin	OID43427	BSG	-0.1583	0.14	0.423608
Q10588	ADP-ribosyl cyclase/cyclic ADP-ribose hydrolase 2	OID44482	BST1	-0.2441	0.0812	0.678967
Q10589	Bone marrow stromal antigen 2	OID44483	BST2	0.1498	-0.0566	0.678967
Q9BX70	BTB/POZ domain-containing protein 2	OID40873	BTBD2	2.4536	0.3948	0.136937
Q5XKL5	BTB/POZ domain-containing protein 8	OID40876	BTBD8	-0.3416	1.0333	0.13738
P43251	Biotinidase	OID45442	BTD	0.1097	-0.0284	0.982281
Q9NY30	Protein BTG4	OID40067	BTG4	-0.3322	0.311	0.0580216
Q7KYR7	Butyrophilin subfamily 2 member A1	OID44484	BTN2A1	0.1869	-0.0185	0.679874
P78410	Butyrophilin subfamily 3 member A2	OID43429	BTN3A2	0.2074	0.1546	0.423705
Q13895	Bystin	OID40068	BYSL	-1.9585	0.991	0.0580255
Q5T681	Uncharacterized protein C10orf62	OID40069	C10orf62	-1.226	-2.0872	0.058408
Q96LP6	Uncharacterized protein C12orf42	OID40072	C12orf42	-0.0049	0.2482	0.0587911
Q6ZW13	Uncharacterized protein C16orf86	OID40886	C16orf86	-0.2451	-0.0307	0.137709
Q6UX73	UPF0764 protein C16orf89	OID43430	C16orf89	-0.1405	0.0014	0.423705
A6NNT2	Uncharacterized protein C16orf96	OID40887	C16orf96	0.132	0.1488	0.137735
Q8WW18	Uncharacterized protein C17orf50	OID40888	C17orf50	0.4235	0.4501	0.137984
Q9NSK7	Protein C19orf12	OID42201	C19orf12	0.1539	0.1221	0.280897
Q8NDD1	Uncharacterized protein C1orf131	OID40891	C1orf131	-0.3993	-0.6086	0.138662
Q7Z5L3	Complement C1q-like protein 2	OID43434	C1QL2	-0.0041	0.0918	0.423705
Q9BXJ1	Complement C1q tumor necrosis factor-related protein 1	OID45318	C1QTNF1	-0.1269	-0.0674	0.928347
P0C862	Complement C1q and tumor necrosis factor-related protein 9A	OID44486	C1QTNF9	-0.0966	0.128	0.679874
Q9NZP8	Complement C1r subcomponent-like protein	OID45443	C1RL	-0.0122	0.2299	0.98314
P09871	Complement C1s subcomponent	OID45444	C1S	-0.0954	-0.1928	0.983183
P06681	Complement C2	OID45320	C2	-0.1021	-0.1638	0.92897
Q9BZE7	UPF0193 protein EVG1	OID40075	C22orf23	0.3459	-0.1684	0.0587911
Q9NWW7	Uncharacterized protein C2orf42	OID40077	C2orf42	-2.9345	1.3849	0.0587911
Q2NKX9	UPF0561 protein C2orf68	OID40896	C2orf68	-0.1973	-0.4177	0.139532
Q8N8R5	Mitochondrial protein C2orf69	OID42203	C2orf69	0.3993	0.1266	0.283491
Q8N5S3	Uncharacterized protein C2orf73	OID40897	C2orf73	1.2397	-0.2293	0.139532
Q0P641	Uncharacterized protein C2orf80	OID40898	C2orf80	-0.3481	-0.1699	0.140333
Q53S99	Folate transporter-like protein C2orf83	OID40078	C2orf83	0.3495	-0.1353	0.0587911
P0C0L5	Complement C4-B	OID45446	C4B	0.0707	0.1617	0.983183
P20851	C4b-binding protein beta chain	OID44488	C4BPB	-0.1281	0.0215	0.679874
Q53FE4	Uncharacterized protein C4orf17	OID40079	C4orf17	0.044	1.8164	0.0587911
A7E2U8	UPF0602 protein C4orf47	OID40904	C4orf47	-2.7102	1.6728	0.140333
D6RIA3	Uncharacterized protein C4orf54	OID40905	C4orf54	0.089	-0.0071	0.140585
Q7Z6I8	UPF0461 protein C5orf24	OID40907	C5orf24	0.2134	-0.1386	0.140654
Q96MH7	Uncharacterized protein C5orf34	OID40908	C5orf34	-0.0162	-0.1339	0.140666
P10643	Complement component C7	OID45448	C7	0.0392	-0.0206	0.983245
Q9BPX7	UPF0415 protein C7orf25	OID40911	C7orf25	0.1315	-0.2839	0.141409
Q9BRJ6	Uncharacterized protein C7orf50	OID43436	C7orf50	-0.0887	-0.172	0.423705
P07358	Complement component C8 beta chain	OID45449	C8B	-0.2572	0.2226	0.983462
Q8NAV2	Uncharacterized protein C8orf58	OID40914	C8orf58	0.2408	0.004	0.141409
P02748	Complement component C9	OID45321	C9	-0.1643	0.1298	0.929709
Q5VYM1	Uncharacterized protein C9orf131	OID40081	C9orf131	0.3459	1.9681	0.0587911
Q8IXQ3	Uncharacterized protein C9orf40	OID43437	C9orf40	1.4862	-0.1887	0.423955
Q8TAL5	Uncharacterized protein C9orf43	OID40916	C9orf43	0.0903	-0.1057	0.141896
P00915	Carbonic anhydrase 1	OID45322	CA1	0.9717	0.2773	0.929886
O43570	Carbonic anhydrase 12	OID43438	CA12	-0.2537	-0.0332	0.424061
Q9ULX7	Carbonic anhydrase 14	OID43439	CA14	0.0062	-0.1243	0.424105
P07451	Carbonic anhydrase 3	OID45047	CA3	0.6167	0.0968	0.822962
P22748	Carbonic anhydrase 4	OID45048	CA4	0.0429	0.0468	0.822962
P23280	Carbonic anhydrase 6	OID45049	CA6	0.0793	0.0007	0.823756
Q16790	Carbonic anhydrase 9	OID43440	CA9	-0.3745	0.104	0.424126
P57796	Calcium-binding protein 4	OID40082	CABP4	-0.0227	-0.0061	0.0587911
Q02641	Voltage-dependent L-type calcium channel subunit beta-1	OID42212	CACNB1	3.9392	-1.3519	0.284664
Q8WUQ7	Cactin	OID40084	CACTIN	5.6303	-1.2878	0.0590174
P05937	Calbindin	OID43442	CALB1	-0.175	0.3785	0.424433
P01258	Calcitonin	OID43443	CALCA	-0.4385	-0.678	0.424796
P10092	Calcitonin gene-related peptide 2	OID43444	CALCB	-0.193	0.0435	0.424796
Q96GE6	Calmodulin-like protein 4	OID43447	CALML4	0.0314	0.4951	0.425139
Q8TD86	Calmodulin-like protein 6	OID40921	CALML6	-2.6549	2.7411	0.142684
Q9NYX4	Neuron-specific vesicular protein calcyon	OID42215	CALY	-1.1037	-0.5143	0.285327
Q96NX5	Calcium/calmodulin-dependent protein kinase type 1G	OID40086	CAMK1G	0.3459	-0.1684	0.0593979
Q16566	Calcium/calmodulin-dependent protein kinase type IV	OID42216	CAMK4	0.1516	-0.0839	0.286858
P49069	Guided entry of tail-anchored proteins factor CAMLG	OID42218	CAMLG	0.0703	0.8255	0.287126
Q5T5Y3	Calmodulin-regulated spectrin-associated protein 1	OID43448	CAMSAP1	0.2789	0.0415	0.425658
Q8WVQ1	Soluble calcium-activated nucleotidase 1	OID44491	CANT1	-0.1089	-0.0074	0.679874
P40123	Adenylyl cyclase-associated protein 2	OID42220	CAP2	-0.2278	0.3502	0.287289
P40121	Macrophage-capping protein	OID43449	CAPG	0.3496	0.1481	0.425658
P20807	Calpain-3	OID43450	CAPN3	-0.0333	-0.0063	0.425658
A6NHC0	Calpain-8	OID40922	CAPN8	0.4516	-0.048	0.143268
Q14444	Caprin-1	OID42221	CAPRIN1	0.4204	0.0289	0.287502
Q6IMN6	Caprin-2	OID40923	CAPRIN2	0.3149	-0.4485	0.145146
Q8WWF8	Calcyphosin-like protein	OID40087	CAPSL	-1.7498	0.3264	0.059688
Q9Y2V2	Calcium-regulated heat-stable protein 1	OID42222	CARHSP1	0.5337	-0.0888	0.287635
Q8WXD9	Caskin-1	OID40088	CASKIN1	-4.5172	1.7981	0.059688
P29466	Caspase-1	OID42224	CASP1	0.5815	0.1152	0.289122
Q92851	Caspase-10	OID43452	CASP10	0.2551	0.0793	0.42714
P42574	Caspase-3	OID45050	CASP3	0.4796	0.1985	0.823866
P49662	Caspase-4	OID42225	CASP4	-0.0923	0.1754	0.28941
Q14790	Caspase-8	OID43455	CASP8	1.186	0.3332	0.42714
Q9UKL3	CASP8-associated protein 2	OID40925	CASP8AP2	0.8246	-0.1264	0.14562
P04040	Catalase	OID45323	CAT	0.6932	0.1778	0.929886
P27352	Cobalamin binding intrinsic factor	OID44492	CBLIF	-0.2271	0.0094	0.681213
Q8N7E2	E3 ubiquitin-protein ligase CBLL2	OID40927	CBLL2	0.4419	0.3113	0.14562
Q8IUK8	Cerebellin-2	OID45051	CBLN2	-0.0004	0.0371	0.823866
Q9NTU7	Cerebellin-4	OID43457	CBLN4	0.1727	0.1973	0.427266
P35520	Cystathionine beta-synthase	OID43458	CBS	0.4524	0.2714	0.427266
Q9Y3M2	Protein chibby homolog 1	OID40930	CBY1	-0.0714	-1.0608	0.145826
Q8IX12	Cell division cycle and apoptosis regulator protein 1	OID43461	CCAR1	0.2576	0.1093	0.427947
Q8N163	Cell cycle and apoptosis regulator protein 2	OID43462	CCAR2	-0.1653	-0.1015	0.427947
Q6UXH8	Collagen and calcium-binding EGF domain-containing protein 1	OID44493	CCBE1	-0.0765	0.1005	0.682236
Q68D86	Coiled-coil domain-containing protein 102B	OID42231	CCDC102B	-0.0022	-0.0986	0.289482
Q6ZUS5	Coiled-coil domain-containing protein 121	OID40090	CCDC121	-2.7005	-0.2682	0.0597623
Q86Z20	Coiled-coil domain-containing protein 125	OID40933	CCDC125	0.3682	-0.2031	0.147315
Q9H6E4	Coiled-coil domain-containing protein 134	OID43463	CCDC134	-0.2446	0.8287	0.427947
Q6PK04	Coiled-coil domain-containing protein 137	OID40936	CCDC137	-0.0772	-0.4144	0.147315
Q96M89	Coiled-coil domain-containing protein 138	OID40937	CCDC138	-0.3169	0.1052	0.147517
Q8IYA2	Putative coiled-coil domain-containing protein 144C	OID40940	CCDC144CP	-0.2678	-0.1105	0.147517
Q8NFR7	Coiled-coil domain-containing protein 148	OID40941	CCDC148	-0.3423	-0.0842	0.148829
Q569K6	Coiled-coil domain-containing protein 157	OID40942	CCDC157	-1.0932	1.7079	0.148908
Q8NDH2	Leucine-rich repeat transmembrane protein CCDC168	OID40943	CCDC168	-4.6867	-0.3433	0.149494
Q8IYT3	Coiled-coil domain-containing protein 170	OID40945	CCDC170	-0.1748	0.0762	0.150458
P0C7W6	Coiled-coil domain-containing protein 172	OID40091	CCDC172	6.7149	-2.9538	0.0610174
Q9BUN5	Coiled-coil domain-containing protein 28B	OID40949	CCDC28B	0.5727	-0.0104	0.150458
Q96MW1	Coiled-coil domain-containing protein 43	OID40951	CCDC43	0.1274	-0.1674	0.151313
A2RUB6	Coiled-coil domain-containing protein 66	OID40954	CCDC66	0.0135	-0.3029	0.151313
Q96M83	Coiled-coil domain-containing protein 7	OID40955	CCDC7	-1.2884	0.5297	0.151313
Q6ZRK6	Coiled-coil domain-containing protein 73	OID40956	CCDC73	-1.5652	1.9752	0.151313
Q76M96	Coiled-coil domain-containing protein 80	OID44494	CCDC80	-0.0067	-0.0541	0.683653
Q96PX6	Coiled-coil domain-containing protein 85A	OID42233	CCDC85A	0.8465	0.0677	0.289907
A6NC98	Coiled-coil domain-containing protein 88B	OID40957	CCDC88B	0.4339	-0.425	0.151313
Q99616	C-C motif chemokine 13	OID44495	CCL13	-0.1283	0.0696	0.683858
Q16627	C-C motif chemokine 14	OID45324	CCL14	-0.0219	-0.1012	0.929886
Q16663	C-C motif chemokine 15	OID45052	CCL15	-0.0207	0.0285	0.823869
O15467	C-C motif chemokine 16	OID45053	CCL16	-0.0261	0.0418	0.823869
Q92583	C-C motif chemokine 17	OID44496	CCL17	-0.0603	0.0463	0.685837
P55774	C-C motif chemokine 18	OID45325	CCL18	0.2515	-0.3189	0.929886
Q99731	C-C motif chemokine 19	OID44497	CCL19	-0.3198	-0.4277	0.686026
P13500	C-C motif chemokine 2	OID44498	CCL2	-0.4781	0.3673	0.686875
P78556	C-C motif chemokine 20	OID43469	CCL20	-0.2745	0.1225	0.427947
O00585	C-C motif chemokine 21	OID44499	CCL21	-0.8873	-0.1027	0.686897
P55773	C-C motif chemokine 23	OID44501	CCL23	-0.1903	0.0039	0.687089
O00175	C-C motif chemokine 24	OID44502	CCL24	-0.1491	0.0263	0.687089
O15444	C-C motif chemokine 25	OID43470	CCL25	-0.3157	0.0112	0.430299
Q9Y258	C-C motif chemokine 26	OID43471	CCL26	-0.0101	0.1145	0.430363
Q9Y4X3	C-C motif chemokine 27	OID44503	CCL27	0.0829	0.026	0.68712
Q9NRJ3	C-C motif chemokine 28	OID43472	CCL28	-0.2671	0.3581	0.430363
P13236	C-C motif chemokine 4	OID44504	CCL4	0.4972	-0.0008	0.68712
P13501	C-C motif chemokine 5	OID45326	CCL5	0.1661	0.1745	0.929907
P80075	C-C motif chemokine 8	OID43475	CCL8	-0.203	0.0724	0.430363
O00622	CCN family member 1	OID43476	CCN1	-0.1145	0.0689	0.430363
P29279	CCN family member 2	OID44505	CCN2	-0.3583	0.0647	0.68712
P48745	CCN family member 3	OID45054	CCN3	0.0048	0.1096	0.823869
O95388	CCN family member 4	OID43477	CCN4	-0.0375	0.0385	0.430505
O76076	CCN family member 5	OID45055	CCN5	0.0493	0.0253	0.823869
P24385	G1/S-specific cyclin-D1	OID40096	CCND1	-0.7712	0.7989	0.0614119
P30279	G1/S-specific cyclin-D2	OID42234	CCND2	-0.313	-0.6371	0.28996
Q9UK58	Cyclin-L1	OID40962	CCNL1	-0.7052	0.1608	0.151313
O43303	Centriolar coiled-coil protein of 110 kDa	OID40965	CCP110	0.7781	-0.4681	0.151313
Q6IQ19	Centriole, cilia and spindle-associated protein	OID40966	CCSAP	0.6688	-0.0278	0.151451
Q93033	Immunoglobulin superfamily member 2	OID43479	CD101	-0.0185	-0.0916	0.430505
Q6YHK3	CD109 antigen	OID45056	CD109	0.2045	0.0486	0.823869
P08571	Monocyte differentiation antigen CD14	OID45327	CD14	0.0724	0.0577	0.929907
O95971	CD160 antigen	OID43480	CD160	-0.0424	0.2244	0.430505
Q86VB7	Scavenger receptor cysteine-rich type 1 protein M130	OID45328	CD163	-0.0228	0.1299	0.929907
Q04900	Sialomucin core protein 24	OID45057	CD164	0.1828	0.1836	0.823869
Q8N6Q3	CD177 antigen	OID45058	CD177	0.9364	0.2479	0.82579
P29017	T-cell surface glycoprotein CD1c	OID44506	CD1C	0.13	0.0329	0.687174
Q8TD46	Cell surface glycoprotein CD200 receptor 1	OID43482	CD200R1	-0.114	0.1679	0.431132
P20273	B-cell receptor CD22	OID43484	CD22	0.078	0.1577	0.433129
Q15762	CD226 antigen	OID43485	CD226	0.1475	0.0912	0.433129
Q9BZW8	Natural killer cell receptor 2B4	OID43486	CD244	-0.2045	0.0516	0.433622
Q9HCU0	Endosialin	OID45059	CD248	-0.0614	0.0042	0.826175
P26842	CD27 antigen	OID44507	CD27	-0.1527	0.1055	0.68856
Q9NZQ7	Programmed cell death 1 ligand 1	OID43487	CD274	-0.1961	0.2839	0.433622
P10747	T-cell-specific surface glycoprotein CD28	OID42239	CD28	0.1959	0.0746	0.29008
Q9Y5K6	CD2-associated protein	OID44509	CD2AP	0.8163	0.0473	0.688576
O95400	CD2 antigen cytoplasmic tail-binding protein 2	OID40968	CD2BP2	0.0707	-0.0863	0.151451
Q9UGN4	CMRF35-like molecule 8	OID44510	CD300A	0.0491	0.0952	0.688576
Q08708	CMRF35-like molecule 6	OID44511	CD300C	0.137	-0.0349	0.689136
Q496F6	CMRF35-like molecule 2	OID43488	CD300E	0.3572	0.2986	0.433622
A8K4G0	CMRF35-like molecule 7	OID40969	CD300LB	0.7582	-0.0975	0.151929
Q6UXZ3	CMRF35-like molecule 5	OID40097	CD300LD	-0.2673	-0.193	0.0620917
Q8TDQ1	CMRF35-like molecule 1	OID43489	CD300LF	0.1307	0.2511	0.433622
Q6UXG3	CMRF35-like molecule 9	OID45060	CD300LG	-0.0908	-0.0048	0.826947
Q8IX05	CD302 antigen	OID43490	CD302	0.0536	-0.0247	0.433803
P20138	Myeloid cell surface antigen CD33	OID44512	CD33	0.2099	0.0166	0.689136
P28906	Hematopoietic progenitor cell antigen CD34	OID44513	CD34	0.0625	0.1525	0.6892
P28907	ADP-ribosyl cyclase/cyclic ADP-ribose hydrolase 1	OID43491	CD38	0.0765	0.0441	0.433856
P07766	T-cell surface glycoprotein CD3 epsilon chain	OID42243	CD3E	5.7099	-0.1376	0.290264
P01730	T-cell surface glycoprotein CD4	OID43492	CD4	-0.2443	0.2745	0.434099
P29965	CD40 ligand	OID43493	CD40LG	0.0502	-0.0809	0.434309
P09326	CD48 antigen	OID44515	CD48	-0.131	0.039	0.6892
P06127	T-cell surface glycoprotein CD5	OID43494	CD5	-0.202	0.1172	0.434309
P08174	Complement decay-accelerating factor	OID45330	CD55	0.0331	0.0497	0.930443
P19256	Lymphocyte function-associated antigen 3	OID44516	CD58	-0.0321	0.0272	0.689209
P13987	CD59 glycoprotein	OID45061	CD59	0.1585	0.0543	0.827933
P30203	T-cell differentiation antigen CD6	OID43495	CD6	0.1055	0.12	0.434806
P08962	CD63 antigen	OID43496	CD63	0.2089	0.0765	0.435202
P32970	CD70 antigen	OID43498	CD70	-0.0983	0.0343	0.435351
P21854	B-cell differentiation antigen CD72	OID44518	CD72	-0.1683	0.2538	0.689595
P04233	HLA class II histocompatibility antigen gamma chain	OID44519	CD74	0.0034	0.0957	0.689699
P40259	B-cell antigen receptor complex-associated protein beta chain	OID43499	CD79B	-0.2768	0.0113	0.435351
P33681	T-lymphocyte activation antigen CD80	OID44520	CD80	0.0092	0.0022	0.689699
Q01151	CD83 antigen	OID43500	CD83	-0.0706	0.3873	0.435351
Q9UIB8	SLAM family member 5	OID43501	CD84	0.0188	0.155	0.435351
P42081	T-lymphocyte activation antigen CD86	OID43502	CD86	0.0648	0.0122	0.436044
P01732	T-cell surface glycoprotein CD8 alpha chain	OID44521	CD8A	-0.465	-0.1339	0.690052
Q9NPY3	Complement component C1q receptor	OID45331	CD93	-0.0803	-0.0605	0.932388
Q8TCZ2	CD99 antigen-like protein 2	OID45063	CD99L2	0.3163	0.078	0.828552
P32320	Cytidine deaminase	OID44522	CDA	0.0184	-0.2028	0.69016
Q16543	Hsp90 co-chaperone Cdc37	OID44523	CDC37	-0.0094	0.325	0.690508
Q7L3B6	Hsp90 co-chaperone Cdc37-like 1	OID40971	CDC37L1	0.2872	0.1151	0.151929
Q9H5V8	CUB domain-containing protein 1	OID43506	CDCP1	-0.0616	0.0072	0.436513
P12830	Cadherin-1	OID45332	CDH1	0.0371	0.022	0.932455
P55291	Cadherin-15	OID44524	CDH15	0.1251	-0.1602	0.690508
Q12864	Cadherin-17	OID44525	CDH17	0.0173	0.0734	0.691009
P19022	Cadherin-2	OID44526	CDH2	-0.0359	0.0516	0.692361
P22223	Cadherin-3	OID44527	CDH3	0.0945	-0.0328	0.692641
P33151	Cadherin-5	OID45064	CDH5	0.0416	0.0637	0.82923
P55285	Cadherin-6	OID44528	CDH6	0.0493	0.0427	0.692641
Q9BYE9	Cadherin-related family member 2	OID43507	CDHR2	-0.0713	0.1614	0.436978
Q9HBB8	Cadherin-related family member 5	OID44529	CDHR5	-0.0283	0.0791	0.693922
Q9NYV4	Cyclin-dependent kinase 12	OID40975	CDK12	-0.0537	-0.1427	0.151929
O94921	Cyclin-dependent kinase 14	OID40976	CDK14	0.8131	0.3921	0.152838
Q00537	Cyclin-dependent kinase 17	OID40977	CDK17	0.3513	-0.2261	0.153256
O75956	Cyclin-dependent kinase 2-associated protein 2	OID40979	CDK2AP2	0.003	0.3303	0.153316
O76039	Cyclin-dependent kinase-like 5	OID40981	CDKL5	-2.0277	2.1736	0.154025
Q4KMG0	Cell adhesion molecule-related/down-regulated by oncogenes	OID44530	CDON	-0.1359	-0.0177	0.694275
Q15517	Corneodesmosin	OID43511	CDSN	0.2387	-0.0974	0.438385
Q9UKY7	Protein CDV3 homolog	OID44531	CDV3	0.2786	-0.151	0.694275
P13688	Carcinoembryonic antigen-related cell adhesion molecule 1	OID44532	CEACAM1	-0.0796	0.0573	0.694275
Q2WEN9	Carcinoembryonic antigen-related cell adhesion molecule 16	OID43512	CEACAM16	0.2039	0.1476	0.438632
Q6UY09	Carcinoembryonic antigen-related cell adhesion molecule 20	OID42258	CEACAM20	-0.1281	0.4914	0.291019
Q3KPI0	Carcinoembryonic antigen-related cell adhesion molecule 21	OID43514	CEACAM21	0.3146	0.1682	0.438632
P40198	Carcinoembryonic antigen-related cell adhesion molecule 3	OID42259	CEACAM3	0.7122	0.0841	0.292172
O75871	Carcinoembryonic antigen-related cell adhesion molecule 4	OID40102	CEACAM4	0.6418	0.1118	0.062235
P06731	Carcinoembryonic antigen-related cell adhesion molecule 5	OID42260	CEACAM5	0.4785	-0.2018	0.292677
P17676	CCAAT/enhancer-binding protein beta	OID40986	CEBPB	0.2258	-0.4924	0.155448
P08217	Chymotrypsin-like elastase family member 2A	OID45066	CELA2A	-0.2498	-0.0496	0.829558
P09093	Chymotrypsin-like elastase family member 3A	OID45067	CELA3A	-0.4841	-0.1086	0.829978
Q9HCU4	Cadherin EGF LAG seven-pass G-type receptor 2	OID44533	CELSR2	-0.216	-0.3452	0.694354
Q86UT8	Centrosomal AT-AC splicing factor	OID40989	CENATAC	0.404	0.2466	0.155676
P49454	Centromere protein F	OID42267	CENPF	0.8482	-0.3142	0.292677
Q8N960	Centrosomal protein of 120 kDa	OID42271	CEP120	0.6577	-0.037	0.293607
Q9UPN4	Centrosomal protein of 131 kDa	OID44534	CEP131	0.6859	0.2338	0.694354
Q9BV73	Centrosome-associated protein CEP250	OID43518	CEP250	1.2912	0.2291	0.438986
Q96MC4	CEP295 N-terminal-like protein	OID40991	CEP295NL	0.3243	-0.2697	0.15682
Q5VT06	Centrosome-associated protein 350	OID42278	CEP350	0.1146	-0.1245	0.293607
O95684	Centrosomal protein 43	OID43519	CEP43	-0.4144	-0.05	0.440269
Q53EZ4	Centrosomal protein of 55 kDa	OID42280	CEP55	0.6811	0.0024	0.295105
Q8IYX8	Centrosomal protein CEP57L1	OID40992	CEP57L1	-0.5853	-2.0507	0.15682
Q5SZL2	Centrosomal protein of 85 kDa-like	OID40993	CEP85L	-0.1226	-0.139	0.15682
Q96ST8	Centrosomal protein of 89 kDa	OID40994	CEP89	1.0681	0.4332	0.157176
Q8IW35	Centrosomal protein of 97 kDa	OID40995	CEP97	-0.2514	-0.1289	0.158615
P23141	Liver carboxylesterase 1	OID45068	CES1	-0.0926	0.1059	0.829994
O00748	Cocaine esterase	OID43520	CES2	-0.1604	0.1363	0.440847
O15182	Centrin-3	OID43522	CETN3	0.8541	0.2578	0.440847
Q5VTH2	Protein Flattop	OID40108	CFAP126	0.5131	-2.2926	0.062387
Q9Y6A4	Cilia- and flagella-associated protein 20	OID40998	CFAP20	-4.3279	-0.2586	0.158775
Q5T5A4	Cilia- and flagella-associated protein 276	OID41000	CFAP276	0.2016	-0.0473	0.161749
Q96G28	Cilia- and flagella-associated protein 36	OID43523	CFAP36	0.1121	0.174	0.441072
Q9UL16	Cilia- and flagella-associated protein 45	OID42285	CFAP45	0.3487	0.2811	0.295787
Q8NHU2	Cilia- and flagella-associated protein 61	OID41004	CFAP61	0.843	0.0483	0.161749
A5D8W1	Cilia- and flagella-associated protein 69	OID41005	CFAP69	0.096	0.8278	0.16177
D6REC4	Cilia- and flagella-associated protein 99	OID41007	CFAP99	2.1003	-0.3586	0.161811
P00751	Complement factor B	OID45451	CFB	-0.0691	0.0929	0.983471
P00746	Complement factor D	OID45452	CFD	-0.0927	-0.08	0.983945
Q92496	Complement factor H-related protein 4	OID45455	CFHR4	-0.1265	0.0058	0.985125
Q9BXR6	Complement factor H-related protein 5	OID45333	CFHR5	-0.082	-0.0117	0.932896
P05156	Complement factor I	OID45456	CFI	-0.0505	0.0793	0.986057
P27918	Properdin	OID45457	CFP	-0.0762	-0.1823	0.986057
Q99674	Cell growth regulator with EF hand domain protein 1	OID44535	CGREF1	-0.129	-0.0822	0.696119
Q8WUX2	Glutathione-specific gamma-glutamylcyclotransferase 2	OID42289	CHAC2	0.8437	0.0131	0.295817
O15335	Chondroadherin	OID44536	CHAD	-0.0734	0.0209	0.696885
Q13112	Chromatin assembly factor 1 subunit B	OID40113	CHAF1B	1.981	-0.6982	0.062387
Q8WYQ3	Coiled-coil-helix-coiled-coil-helix domain-containing protein 10, mitochondrial	OID43524	CHCHD10	-0.2055	0.2426	0.441072
Q5T1J5	Putative coiled-coil-helix-coiled-coil-helix domain-containing protein CHCHD2P9, mitochondrial	OID41009	CHCHD2P9	1.6015	-0.8539	0.162175
Q9NX63	MICOS complex subunit MIC19	OID42290	CHCHD3	1.552	0.1212	0.296215
Q9BRQ6	MICOS complex subunit MIC25	OID43525	CHCHD6	-0.1886	0.2209	0.441245
O96017	Serine/threonine-protein kinase Chk2	OID41012	CHEK2	-1.192	-0.161	0.162259
P10645	Chromogranin-A	OID45070	CHGA	-0.1731	-0.057	0.830034
P05060	Secretogranin-1	OID44537	CHGB	-0.2624	-0.3861	0.696885
P36222	Chitinase-3-like protein 1	OID45335	CHI3L1	0.2614	0.25	0.934134
Q13231	Chitotriosidase-1	OID45071	CHIT1	0.1648	0.1298	0.830166
O00533	Neural cell adhesion molecule L1-like protein	OID45336	CHL1	0.1205	0.0668	0.934674
Q9HD42	Charged multivesicular body protein 1a	OID43527	CHMP1A	0.2463	-0.128	0.441245
Q96FZ7	Charged multivesicular body protein 6	OID44538	CHMP6	0.4075	0.131	0.696885
Q9BU40	Chordin-like protein 1	OID44539	CHRDL1	-0.4281	0.0791	0.696885
Q6WN34	Chordin-like protein 2	OID44540	CHRDL2	-0.1115	-0.0886	0.696885
O15111	Inhibitor of nuclear factor kappa-B kinase subunit alpha	OID42293	CHUK	0.1657	-0.194	0.296215
Q9H5X1	Cytosolic iron-sulfur assembly component 2A	OID41019	CIAO2A	1.4426	0.278	0.162259
O75339	Cartilage intermediate layer protein 1	OID45072	CILP	0.0533	-0.0462	0.831309
Q9C0C6	CLOCK-interacting pacemaker	OID40118	CIPC	0.2523	1.3395	0.062708
O14578	Citron Rho-interacting kinase	OID43529	CIT	0.3336	0.2225	0.441245
Q07065	Cytoskeleton-associated protein 4	OID43530	CKAP4	-0.1707	0.4938	0.441694
Q14008	Cytoskeleton-associated protein 5	OID44542	CKAP5	0.3138	-0.1594	0.696885
P12277	Creatine kinase B-type	OID45073	CKB	-0.2182	0.1323	0.831479
P12532	Creatine kinase U-type, mitochondrial	OID44543	CKMT1A_CKMT1B	-0.2267	0.0258	0.697013
Q96F83	Uncharacterized protein CLBA1	OID40120	CLBA1	0.1985	-3.7214	0.0630343
Q05315	Galectin-10	OID44544	CLC	0.8202	0.2804	0.69712
Q8IUN9	C-type lectin domain family 10 member A	OID43531	CLEC10A	0.0494	0.0819	0.441754
Q86T13	C-type lectin domain family 14 member A	OID45075	CLEC14A	0.0066	0.0134	0.831479
Q9UMR7	C-type lectin domain family 4 member A	OID43534	CLEC4A	0.3926	0.3655	0.442966
Q8WTT0	C-type lectin domain family 4 member C	OID43535	CLEC4C	-0.0968	0.192	0.442966
Q8WXI8	C-type lectin domain family 4 member D	OID43536	CLEC4D	0.2659	-0.0187	0.442966
Q6UXB4	C-type lectin domain family 4 member G	OID43537	CLEC4G	-0.0584	0.0098	0.443442
Q9H2X3	C-type lectin domain family 4 member M	OID45076	CLEC4M	0.2531	0.0172	0.831479
Q9NY25	C-type lectin domain family 5 member A	OID44546	CLEC5A	0.3995	0.1144	0.697401
Q6EIG7	C-type lectin domain family 6 member A	OID42297	CLEC6A	0.4066	0.1068	0.298398
O14967	Calmegin	OID42298	CLGN	0.5231	0.1552	0.298398
Q9H6B4	CXADR-like membrane protein	OID43540	CLMP	-0.1955	0.2104	0.445218
Q9H4D0	Calsyntenin-2	OID43542	CLSTN2	-0.2074	0.0903	0.446476
Q9BQT9	Calsyntenin-3	OID43543	CLSTN3	0.0771	0.0807	0.446476
P09496	Clathrin light chain A	OID41032	CLTA	0.0055	-0.0083	0.162895
P10909	Clusterin	OID45458	CLU	-0.4542	0.1806	0.986057
Q15846	Clusterin-like protein 1	OID44548	CLUL1	-0.0194	-0.0294	0.697401
Q9HAE3	Calaxin	OID40121	CLXN	0.4519	3.4132	0.0631564
Q8IY22	C-Maf-inducing protein	OID43544	CMIP	-0.8366	-0.0867	0.446476
Q8N3K9	Cardiomyopathy-associated protein 5	OID43545	CMYA5	-0.1021	0.0226	0.446476
Q96KN2	Beta-Ala-His dipeptidase	OID45337	CNDP1	-0.0228	0.0855	0.936065
Q99439	Calponin-2	OID44550	CNN2	0.2977	-0.3148	0.702568
O95628	CCR4-NOT transcription complex subunit 4	OID41040	CNOT4	0.2993	-0.0692	0.162954
P09543	2',3'-cyclic-nucleotide 3'-phosphodiesterase	OID43546	CNP	1.0762	0.1062	0.446575
Q8N129	Protein canopy homolog 4	OID43547	CNPY4	-0.0558	0.4683	0.446639
Q6PJW8	Consortin	OID44551	CNST	0.0002	0.0468	0.702568
Q12860	Contactin-1	OID45078	CNTN1	-0.0449	0.0153	0.831479
Q02246	Contactin-2	OID43548	CNTN2	0.367	-0.0295	0.447423
Q9P232	Contactin-3	OID45079	CNTN3	0.0029	0.0447	0.831479
Q8IWV2	Contactin-4	OID45080	CNTN4	0.0095	0.027	0.831638
O94779	Contactin-5	OID44552	CNTN5	-0.0398	0.0341	0.702568
Q9UHC6	Contactin-associated protein-like 2	OID43549	CNTNAP2	-0.2532	0.158	0.447818
O43405	Cochlin	OID44553	COCH	0.0007	-0.0363	0.702568
P39059	Collagen alpha-1(XV) chain	OID45081	COL15A1	-0.1519	0.0088	0.83278
P39060	Collagen alpha-1(XVIII) chain	OID45082	COL18A1	0.0288	0.0697	0.832784
P02452	Collagen alpha-1(I) chain	OID45083	COL1A1	0.0696	0.0214	0.833964
Q17RW2	Collagen alpha-1(XXIV) chain	OID43550	COL24A1	0.0647	0.0487	0.447818
Q96A83	Collagen alpha-1(XXVI) chain	OID41046	COL26A1	-0.3457	-0.8407	0.163187
Q2UY09	Collagen alpha-1(XXVIII) chain	OID43551	COL28A1	-0.0866	0.0029	0.447818
P02462	Collagen alpha-1(IV) chain	OID44554	COL4A1	0.0294	0.0646	0.702581
P20908	Collagen alpha-1(V) chain	OID44555	COL5A1	-0.1306	0.015	0.703832
P12111	Collagen alpha-3(VI) chain	OID45085	COL6A3	-0.0407	0.0751	0.834558
P20849	Collagen alpha-1(IX) chain	OID43553	COL9A1	-0.0965	0.075	0.447818
Q9BWP8	Collectin-11	OID45086	COLEC11	-0.0833	0.0352	0.834962
Q5KU26	Collectin-12	OID44556	COLEC12	0.0305	-0.0646	0.704045
Q8N668	COMM domain-containing protein 1	OID43554	COMMD1	0.8433	0.1892	0.447818
Q86X83	COMM domain-containing protein 2	OID44557	COMMD2	0.862	0.3338	0.704045
Q9P000	COMM domain-containing protein 9	OID43555	COMMD9	0.5818	0.3674	0.448175
P49747	Cartilage oligomeric matrix protein	OID45338	COMP	-0.0213	0.0921	0.937787
P21964	Catechol O-methyltransferase	OID43556	COMT	0.3961	-0.1609	0.448175
P31146	Coronin-1A	OID45087	CORO1A	1.4481	0.2722	0.834962
Q6QEF8	Coronin-6	OID42315	CORO6	0.1115	-0.0247	0.298398
P10606	Cytochrome c oxidase subunit 5B, mitochondrial	OID43559	COX5B	0.4559	0.0485	0.448358
P15085	Carboxypeptidase A1	OID45088	CPA1	0.1603	-0.0701	0.834962
P48052	Carboxypeptidase A2	OID44559	CPA2	-0.0866	0.0239	0.704532
Q9UI42	Carboxypeptidase A4	OID44560	CPA4	-0.1042	0.0219	0.705353
P15086	Carboxypeptidase B	OID45089	CPB1	-0.0971	0.0176	0.835169
Q96IY4	Carboxypeptidase B2	OID45459	CPB2	0.1583	-0.0027	0.986217
P16870	Carboxypeptidase E	OID43560	CPE	-0.2135	-0.0526	0.448594
P14384	Carboxypeptidase M	OID44561	CPM	-0.0884	0.0333	0.705411
P22792	Carboxypeptidase N subunit 2	OID45339	CPN2	0.0156	0.0994	0.938343
Q9BRF8	Serine/threonine-protein phosphatase CPPED1	OID44562	CPPED1	0.8303	0.0804	0.705626
Q9Y646	Carboxypeptidase Q	OID45090	CPQ	0.1062	0.1759	0.835169
Q9H3G5	Probable serine carboxypeptidase CPVL	OID43561	CPVL	0.0513	0.0426	0.449041
Q96SM3	Probable carboxypeptidase X1	OID44563	CPXM1	-0.1369	-0.0216	0.705626
Q8N436	Inactive carboxypeptidase-like protein X2	OID44564	CPXM2	-0.3086	0.0791	0.705626
P17927	Complement receptor type 1	OID45340	CR1	-0.0296	0.2289	0.939217
P20023	Complement receptor type 2	OID45341	CR2	-0.0544	0.096	0.940346
Q6NV74	CRACD-like protein	OID41051	CRACDL	-0.3112	0.1506	0.163806
Q8N4Y2	EF-hand calcium-binding domain-containing protein 4A	OID41052	CRACR2B	0.0056	0.2255	0.163806
Q5IJ48	Protein crumbs homolog 2	OID44565	CRB2	-0.0066	0.0449	0.705626
O75629	Protein CREG1	OID44566	CREG1	0.2295	0.1543	0.70597
Q96HD1	Protein disulfide isomerase CRELD1	OID44567	CRELD1	-0.0356	0.0235	0.706642
Q6UXH1	Protein disulfide isomerase CRELD2	OID44568	CRELD2	-0.0651	0.194	0.70762
P06850	Corticoliberin	OID42323	CRH	-0.9657	1.2299	0.298486
P24387	Corticotropin-releasing factor-binding protein	OID44569	CRHBP	-0.02	0.0124	0.709683
P34998	Corticotropin-releasing factor receptor 1	OID41054	CRHR1	-4.4161	3.7356	0.163806
P52943	Cysteine-rich protein 2	OID43563	CRIP2	-0.3546	-0.7916	0.449041
P16562	Cysteine-rich secretory protein 2	OID43564	CRISP2	0.0295	0.0267	0.449107
P54108	Cysteine-rich secretory protein 3	OID45342	CRISP3	0.0463	0.1241	0.940346
O75462	Cytokine receptor-like factor 1	OID44572	CRLF1	-0.0179	-0.123	0.709683
Q9UBG3	Cornulin	OID43565	CRNN	-0.1865	0.0206	0.449521
Q9NQ79	Cartilage acidic protein 1	OID45091	CRTAC1	0.0236	0.0756	0.835725
O95727	Cytotoxic and regulatory T-cell molecule	OID43566	CRTAM	-0.1117	0.0554	0.449521
P43320	Beta-crystallin B2	OID43567	CRYBB2	-0.2245	0.2623	0.450022
Q68DQ2	Very large A-kinase anchor protein	OID41057	CRYBG3	1.0488	0.5634	0.163806
P07320	Gamma-crystallin D	OID43568	CRYGD	1.1962	0.2183	0.450022
O95825	Quinone oxidoreductase-like protein 1	OID43569	CRYZL1	0.3079	0.2298	0.450022
P09603	Macrophage colony-stimulating factor 1	OID44574	CSF1	0.0641	0.0953	0.709683
P07333	Macrophage colony-stimulating factor 1 receptor	OID45343	CSF1R	-0.1045	-0.1197	0.940767
P15509	Granulocyte-macrophage colony-stimulating factor receptor subunit alpha	OID43571	CSF2RA	0.0842	0.0938	0.450022
P32927	Cytokine receptor common subunit beta	OID43572	CSF2RB	-0.0636	0.2659	0.450106
P09919	Granulocyte colony-stimulating factor	OID42329	CSF3	-0.5707	0.6526	0.298751
Q6UVK1	Chondroitin sulfate proteoglycan 4	OID45092	CSPG4	-0.0488	-0.0042	0.8376
Q1MSJ5	Centrosome and spindle pole-associated protein 1	OID41059	CSPP1	0.4566	-0.1922	0.163806
P01037	Cystatin-SN	OID44575	CST1	-0.138	0.1075	0.709683
P01034	Cystatin-C	OID45345	CST3	-0.0544	0.0428	0.94175
P28325	Cystatin-D	OID43576	CST5	0.0406	0.0027	0.450446
Q15828	Cystatin-M	OID45093	CST6	-0.2748	0.01	0.8376
O76096	Cystatin-F	OID44576	CST7	-0.0322	0.1292	0.709683
P04080	Cystatin-B	OID45094	CSTB	0.2482	0.3517	0.8376
Q5HYN5	Cancer/testis antigen family 45 member A1	OID40136	CT45A1	2.4129	-2.0347	0.0634627
Q5H943	Kita-kyushu lung cancer antigen 1	OID41061	CT83	-0.5561	0.2229	0.163806
P78358	Cancer/testis antigen 1	OID42332	CTAG1A_CTAG1B	0.3672	-0.3106	0.298751
Q01459	Di-N-acetylchitobiase	OID45346	CTBS	0.031	0.1145	0.942759
Q05D32	CTD small phosphatase-like protein 2	OID41063	CTDSPL2	0.7859	-0.784	0.163806
P32929	Cystathionine gamma-lyase	OID43577	CTH	0.8539	0.21	0.451716
Q96CG8	Collagen triple helix repeat-containing protein 1	OID45095	CTHRC1	-0.181	-0.0083	0.8376
O43310	CBP80/20-dependent translation initiation factor	OID42334	CTIF	0.2954	-0.0211	0.298751
O60716	Catenin delta-1	OID40139	CTNND1	-0.4357	0.5598	0.0636389
P17538	Chymotrypsinogen B	OID45097	CTRB1	-0.2536	-0.0843	0.8376
P40313	Chymotrypsin-like protease CTRL-1	OID43578	CTRL	-0.2555	0.0962	0.451716
P10619	Lysosomal protective protein	OID45098	CTSA	-0.0216	0.0038	0.8376
P53634	Dipeptidyl peptidase 1	OID44578	CTSC	-0.0963	0.117	0.709683
P07339	Cathepsin D	OID45347	CTSD	-0.1957	0.0822	0.944307
P14091	Cathepsin E	OID44579	CTSE	-0.0135	0.0186	0.709683
Q9UBX1	Cathepsin F	OID44580	CTSF	-0.1183	-0.0571	0.709683
P09668	Pro-cathepsin H	OID43579	CTSH	-0.0029	0.1253	0.451716
P07711	Procathepsin L	OID44581	CTSL	-0.2399	-0.0535	0.709683
Q5NE16	Putative inactive cathepsin L-like protein CTSL3P	OID40140	CTSL3P	-0.2602	-0.2706	0.0636389
P43234	Cathepsin O	OID43580	CTSO	-0.1233	0.1124	0.451716
P25774	Cathepsin S	OID44582	CTSS	0.171	0.1411	0.709683
O60911	Cathepsin L2	OID43581	CTSV	-0.2205	0.1311	0.452315
P56202	Cathepsin W	OID42337	CTSW	-0.0188	0.0678	0.298755
Q9UBR2	Cathepsin Z	OID45348	CTSZ	-0.013	0.0668	0.947896
Q9NTM9	Copper homeostasis protein cutC homolog	OID42338	CUTC	0.0291	-0.0823	0.299062
O14529	Homeobox protein cut-like 2	OID41068	CUX2	-0.1905	-0.2381	0.163806
Q9P013	Spliceosome-associated protein CWC15 homolog	OID43582	CWC15	0.0879	0.0118	0.453389
Q9HCG8	Pre-mRNA-splicing factor CWC22 homolog	OID41069	CWC22	0.2233	-0.311	0.163806
Q69YN2	CWF19-like protein 1	OID40143	CWF19L1	0.8746	-0.4223	0.0646742
P78423	Fractalkine	OID43583	CX3CL1	-0.2319	-0.4927	0.453389
P78310	Coxsackievirus and adenovirus receptor	OID43584	CXADR	0.0142	0.0058	0.453567
P09341	Growth-regulated alpha protein	OID44583	CXCL1	-0.2734	0.5073	0.709683
P02778	C-X-C motif chemokine 10	OID44584	CXCL10	0.2944	-0.0111	0.709683
O14625	C-X-C motif chemokine 11	OID44585	CXCL11	0.076	0.265	0.709683
O43927	C-X-C motif chemokine 13	OID44586	CXCL13	0.0731	0.0875	0.709766
Q9H2A7	C-X-C motif chemokine 16	OID45100	CXCL16	-0.0232	-0.0133	0.8376
Q6UXB2	C-X-C motif chemokine 17	OID43585	CXCL17	-0.7966	-0.2276	0.453567
P19876	C-X-C motif chemokine 3	OID45101	CXCL3	-0.0534	0.4412	0.8376
P42830	C-X-C motif chemokine 5	OID44587	CXCL5	-0.0565	-0.0022	0.711623
P80162	C-X-C motif chemokine 6	OID44588	CXCL6	-0.0264	0.1576	0.714076
Q07325	C-X-C motif chemokine 9	OID44589	CXCL9	-0.0074	-0.1175	0.714476
P0DPH9	Uncharacterized protein CXorf51B	OID40144	CXorf51B	-1.9034	1.6727	0.0648167
Q6BCY4	NADH-cytochrome b5 reductase 2	OID43587	CYB5R2	0.5906	0.4516	0.453567
Q9NQC7	Ubiquitin carboxyl-terminal hydrolase CYLD	OID41071	CYLD	0.0446	0.1614	0.164558
Q07973	1,25-dihydroxyvitamin D(3) 24-hydroxylase, mitochondrial	OID42345	CYP24A1	-0.1175	0.1261	0.299158
P51397	Death-associated protein 1	OID44592	DAP	0.4082	-0.1678	0.714476
Q9UIK4	Death-associated protein kinase 2	OID43589	DAPK2	0.4904	-0.1329	0.453567
Q86SG3	Deleted in azoospermia protein 4	OID42348	DAZ4	0.0459	0.0409	0.299471
P09172	Dopamine beta-hydroxylase	OID45349	DBH	0.0757	0.1199	0.950477
P07108	Acyl-CoA-binding protein	OID45103	DBI	0.7455	0.2799	0.8391
Q16643	Drebrin	OID43592	DBN1	-0.0802	0.1538	0.453978
Q10586	D site-binding protein	OID41079	DBP	0.1148	-0.0363	0.164558
Q5T6F0	DDB1- and CUL4-associated factor 12	OID40149	DCAF12	-0.8233	3.8787	0.0648386
Q96PD2	Discoidin, CUB and LCCL domain-containing protein 2	OID44594	DCBLD2	-0.0928	-0.029	0.714706
P07585	Decorin	OID43593	DCN	-0.2348	0.1255	0.454458
Q9NPI6	mRNA-decapping enzyme 1A	OID41082	DCP1A	-0.1287	-0.1189	0.164558
Q96C86	m7GpppX diphosphatase	OID43594	DCPS	-0.0281	-0.1014	0.454458
Q14203	Dynactin subunit 1	OID43595	DCTN1	0.2888	0.0602	0.455105
O00399	Dynactin subunit 6	OID43597	DCTN6	0.407	0.1474	0.455105
Q9H773	dCTP pyrophosphatase 1	OID44596	DCTPP1	0.1028	-0.014	0.714706
Q7Z4W1	L-xylulose reductase	OID44597	DCXR	0.0464	0.0222	0.714709
O94760	N(G),N(G)-dimethylarginine dimethylaminohydrolase 1	OID43598	DDAH1	0.5179	0.2748	0.456317
P20711	Aromatic-L-amino-acid decarboxylase	OID44598	DDC	-0.0698	0.0974	0.714709
O94830	Phospholipase DDHD2	OID43599	DDHD2	0.2538	0.0524	0.456317
Q8WTU0	Protein DDI1 homolog 1	OID40152	DDI1	-0.0128	0.0759	0.0668306
Q5TDH0	Protein DDI1 homolog 2	OID44599	DDI2	0.7981	-0.0565	0.714709
Q8IXT1	DNA damage-induced apoptosis suppressor protein	OID41084	DDIAS	6.3667	-2.3541	0.164558
Q08345	Epithelial discoidin domain-containing receptor 1	OID44600	DDR1	0.1059	0.0515	0.716302
P30046	D-dopachrome decarboxylase	OID45104	DDT	0.0284	0.2302	0.83963
Q92499	ATP-dependent RNA helicase DDX1	OID43600	DDX1	1.0241	0.6728	0.456317
Q13206	Probable ATP-dependent RNA helicase DDX10	OID41085	DDX10	-1.1354	0.5445	0.164558
Q9UHI6	Probable ATP-dependent RNA helicase DDX20	OID41086	DDX20	2.3901	-1.5627	0.164558
Q9NR30	Nucleolar RNA helicase 2	OID41087	DDX21	-0.2648	-0.1355	0.164558
Q9BUQ8	Probable ATP-dependent RNA helicase DDX23	OID42358	DDX23	-0.1692	-0.2035	0.299471
Q9UHL0	ATP-dependent RNA helicase DDX25	OID42359	DDX25	-3.0062	2.5439	0.29965
Q9NQI0	Probable ATP-dependent RNA helicase DDX4	OID42361	DDX4	-0.2097	-3.699	0.29965
Q86TM3	Probable ATP-dependent RNA helicase DDX53	OID42363	DDX53	-1.8258	3.7092	0.299887
Q8NHQ9	ATP-dependent RNA helicase DDX55	OID41089	DDX55	0.8842	-0.2193	0.165155
Q5T1V6	Probable ATP-dependent RNA helicase DDX59	OID41090	DDX59	0.0794	0.1428	0.165155
P59665	Neutrophil defensin 1	OID45350	DEFA1	0.7011	0.2152	0.950676
P81534	Beta-defensin 103	OID43602	DEFB103A_DEFB103B	0.2073	0.1772	0.456317
O15263	Defensin beta 4A	OID43603	DEFB4A_DEFB4B	-0.0067	0.0675	0.456993
Q9NTK1	Protein DEPP1	OID44601	DEPP1	0.0741	-0.0581	0.716381
O00273	DNA fragmentation factor subunit alpha	OID43604	DFFA	0.3563	-0.1141	0.456993
Q86XP1	Diacylglycerol kinase eta	OID41096	DGKH	-0.0484	-0.2061	0.165155
O75912	Diacylglycerol kinase iota	OID43606	DGKI	0.8605	-0.1256	0.456993
Q02127	Dihydroorotate dehydrogenase	OID42374	DHODH	-1.1604	2.2285	0.300339
P49366	Deoxyhypusine synthase	OID43607	DHPS	-0.0469	-0.0246	0.456993
Q9H2U1	ATP-dependent DNA/RNA helicase DHX36	OID41097	DHX36	-0.1743	-0.4789	0.165155
Q9NR28	Diablo IAP-binding mitochondrial protein	OID44602	DIABLO	0.0325	0.3293	0.71651
Q9Y2E4	Disco-interacting protein 2 homolog C	OID40157	DIP2C	1.0847	0.1188	0.0668306
Q9H7Y0	Divergent protein kinase domain 2B	OID44603	DIPK2B	0.0316	0.1103	0.71651
Q8TF46	DIS3-like exonuclease 1	OID41102	DIS3L	-0.1058	0.0575	0.165155
Q155Q3	Dixin	OID40159	DIXDC1	2.613	-1.9771	0.0668306
O94907	Dickkopf-related protein 1	OID44604	DKK1	-0.1663	0.0302	0.718227
Q9UBP4	Dickkopf-related protein 3	OID45106	DKK3	0.0189	0.1412	0.841227
Q9UBT3	Dickkopf-related protein 4	OID43609	DKK4	-0.1269	-0.0318	0.456993
Q6UYE1	Leukemia-associated protein 7	OID40160	DLEU7	-1.68	1.8666	0.0671794
P80370	Protein delta homolog 1	OID45107	DLK1	-0.0262	0.0223	0.842552
O00548	Delta-like protein 1	OID44605	DLL1	-0.0977	-0.0447	0.718237
Q9NR61	Delta-like protein 4	OID43612	DLL4	-0.0296	-0.7697	0.456993
O60479	Homeobox protein DLX-3	OID40161	DLX3	0.0952	-3.4224	0.0676059
P11532	Dystrophin	OID43613	DMD	-0.0447	0.0893	0.456993
Q9NVR5	Protein kintoun	OID40163	DNAAF2	-5.7833	1.9737	0.0679936
Q8IYS4	Dynein axonemal assembly factor 8	OID41106	DNAAF8	-2.7273	-1.0869	0.165155
Q9P2D7	Dynein axonemal heavy chain 1	OID41107	DNAH1	0.0049	-0.2672	0.165155
Q8IVF4	Dynein axonemal heavy chain 10	OID41108	DNAH10	0.0269	-0.9397	0.165155
Q9NYC9	Dynein axonemal heavy chain 9	OID40168	DNAH9	0.3459	3.7857	0.0679936
Q5VTH9	Dynein axonemal intermediate chain 4	OID41111	DNAI4	0.2388	-0.7705	0.165155
Q8WW22	DnaJ homolog subfamily A member 4	OID43616	DNAJA4	1.2163	0.1588	0.456993
P25685	DnaJ homolog subfamily B member 1	OID43617	DNAJB1	0.6624	0.0464	0.457568
P25686	DnaJ homolog subfamily B member 2	OID44606	DNAJB2	1.1097	0.2551	0.718237
Q9UDY4	DnaJ homolog subfamily B member 4	OID43619	DNAJB4	0.6672	0.2032	0.457623
Q8IXB1	DnaJ homolog subfamily C member 10	OID41114	DNAJC10	0.4985	0.1564	0.165231
Q9NVM6	DnaJ homolog subfamily C member 17	OID43621	DNAJC17	0.8776	-0.0952	0.457623
Q9NX36	DnaJ homolog subfamily C member 28	OID41117	DNAJC28	-1.9319	0.9336	0.165552
O75061	Putative tyrosine-protein phosphatase auxilin	OID43623	DNAJC6	1.1429	0.001	0.457623
Q8WXX5	DnaJ homolog subfamily C member 9	OID43624	DNAJC9	0.9507	-0.0786	0.457623
P24855	Deoxyribonuclease-1	OID45108	DNASE1	-0.0265	0.1162	0.842552
Q8NFT8	Delta and Notch-like epidermal growth factor-related receptor	OID44609	DNER	0.073	0.0109	0.718387
Q05193	Dynamin-1	OID43625	DNM1	0.3585	-0.1476	0.457623
Q9ULA0	Aspartyl aminopeptidase	OID43628	DNPEP	-0.1555	-0.0714	0.458379
O43598	2'-deoxynucleoside 5'-phosphate N-hydrolase 1	OID44610	DNPH1	0.8946	0.0888	0.718565
Q5T8R8	Uncharacterized protein DOCK8-AS1	OID41120	DOCK8-AS1	0.0714	0.0443	0.165671
Q9Y3R5	Protein dopey-2	OID40173	DOP1B	0.2384	-0.7836	0.0682541
P16444	Dipeptidase 1	OID43630	DPEP1	0.086	-0.0065	0.458832
Q9H4A9	Dipeptidase 2	OID43631	DPEP2	0.1554	0.0546	0.458832
Q8N608	Inactive dipeptidyl peptidase 10	OID43632	DPP10	-0.1289	-0.0687	0.459023
P27487	Dipeptidyl peptidase 4	OID45351	DPP4	-0.0037	0.1197	0.950875
P42658	Dipeptidyl aminopeptidase-like protein 6	OID43633	DPP6	-0.2172	0.1334	0.459948
Q9UHL4	Dipeptidyl peptidase 2	OID44612	DPP7	0.2007	0.1687	0.718819
Q7L190	Developmental pluripotency-associated protein 4	OID40174	DPPA4	0.3157	-1.0067	0.0682541
Q9C005	Protein dpy-30 homolog	OID43634	DPY30	0.7706	0.1305	0.460114
Q8NBI3	Draxin	OID43635	DRAXIN	-0.1431	-0.1002	0.460132
P14416	Dopamine D2 receptor	OID41124	DRD2	-0.3467	0.3702	0.165879
P55039	Developmentally-regulated GTP-binding protein 2	OID43636	DRG2	0.6056	0.2638	0.460717
A6NNA5	Dorsal root ganglia homeobox protein	OID40177	DRGX	-0.0306	1.2318	0.0682541
Q9NRR4	Ribonuclease 3	OID41125	DROSHA	1.1934	0.3449	0.166124
Q02487	Desmocollin-2	OID45110	DSC2	-0.004	0.017	0.843787
O60469	Cell adhesion molecule DSCAM	OID42386	DSCAM	-0.3648	0.403	0.302522
Q14126	Desmoglein-2	OID45111	DSG2	0.0163	0.0403	0.844235
Q9NZW4	Dentin sialophosphoprotein	OID41127	DSPP	1.1973	-0.2056	0.166595
O60941	Dystrobrevin beta	OID43639	DTNB	-0.2345	0.3074	0.461288
Q86UW9	Probable E3 ubiquitin-protein ligase DTX2	OID42387	DTX2	-0.1383	0.1576	0.302562
Q8N9I9	Probable E3 ubiquitin-protein ligase DTX3	OID43640	DTX3	0.1499	0.0277	0.461638
Q8TDB6	E3 ubiquitin-protein ligase DTX3L	OID42388	DTX3L	0.4607	-0.2553	0.30272
P23919	Thymidylate kinase	OID44614	DTYMK	0.7146	-0.279	0.718819
Q6P1R4	tRNA-dihydrouridine(16/17) synthase [NAD(P)(+)]-like	OID40179	DUS1L	0.8599	1.2551	0.0682541
P33316	Deoxyuridine 5'-triphosphate nucleotidohydrolase, mitochondrial	OID43642	DUT	0.4209	0.2081	0.462026
O77932	Decapping and exoribonuclease protein	OID43643	DXO	0.5719	0.2524	0.462567
Q8TCX1	Cytoplasmic dynein 2 light intermediate chain 1	OID41135	DYNC2LI1	0.8025	-2.9985	0.166595
P63172	Dynein light chain Tctex-type 1	OID42392	DYNLT1	-0.063	-0.3642	0.302895
Q9NVP4	Double zinc ribbon and ankyrin repeat-containing protein 1	OID40183	DZANK1	-0.2898	-0.5309	0.0682541
Q8IYY4	Cilium assembly protein DZIP1L	OID41136	DZIP1L	-0.5622	-1.3055	0.166595
O00559	Receptor-binding cancer antigen expressed on SiSo cells	OID43645	EBAG9	0.2265	-0.3815	0.463628
Q14213_Q8NEV9	Interleukin-27	OID43646	EBI3_IL27	-0.0874	0.081	0.4656
O95905	Protein ecdysoneless homolog	OID40184	ECD	2.3149	3.5725	0.0682541
Q96DC8	Enoyl-CoA hydratase domain-containing protein 3, mitochondrial	OID44615	ECHDC3	-0.0899	-0.0744	0.718819
P30084	Enoyl-CoA hydratase, mitochondrial	OID43648	ECHS1	0.1239	0.166	0.466005
P42126	Enoyl-CoA delta isomerase 1, mitochondrial	OID45112	ECI1	0.0145	0.0989	0.844283
Q9HAV5	Tumor necrosis factor receptor superfamily member 27	OID43649	EDA2R	-0.0374	0.0863	0.467255
Q9UNE0	Tumor necrosis factor receptor superfamily member EDAR	OID43650	EDAR	0.2641	0.3833	0.467255
Q8WWZ3	Ectodysplasin-A receptor-associated adapter protein	OID40186	EDARADD	-1.8887	-1.5983	0.0682541
P56851	Epididymal secretory protein E3-beta	OID43651	EDDM3B	-0.081	0.0573	0.468413
O60869	Endothelial differentiation-related factor 1	OID43652	EDF1	0.676	0.0994	0.469583
O43854	EGF-like repeat and discoidin I-like domain-containing protein 3	OID43653	EDIL3	0.0856	0.0534	0.470212
P05305	Endothelin-1	OID43654	EDN1	-0.532	0.034	0.47046
Q5T8I3	Protein FAM102B	OID41181	EEIG2	1.0633	-0.26	0.172056
Q7L9B9	Endonuclease/exonuclease/phosphatase family domain-containing protein 1	OID41144	EEPD1	0.4753	0.0714	0.166595
Q6NXP0	EF-hand calcium-binding domain-containing protein 12	OID41146	EFCAB12	-0.0019	-0.5046	0.166595
Q8IY85	EF-hand calcium-binding domain-containing protein 13	OID40187	EFCAB13	2.1318	-0.3186	0.0682541
A8MWE9	EF-hand calcium-binding domain-containing protein 8	OID41147	EFCAB8	-1.3413	0.538	0.166595
Q9HA90	EF-hand and coiled-coil domain-containing protein 1	OID41148	EFCC1	0.0655	-0.7154	0.167078
Q12805	EGF-containing fibulin-like extracellular matrix protein 1	OID45352	EFEMP1	0.0778	0.2169	0.951117
O95967	EGF-containing fibulin-like extracellular matrix protein 2	OID44617	EFEMP2	-0.1727	0.004	0.718819
Q9BUP0	EF-hand domain-containing protein D1	OID43656	EFHD1	-0.2187	0.0696	0.47046
Q96C19	EF-hand domain-containing protein D2	OID43657	EFHD2	0.2468	-0.0683	0.47046
P20827	Ephrin-A1	OID45114	EFNA1	0.0879	-0.1001	0.844732
Q8IUX8	Epidermal growth factor-like protein 6	OID44619	EGFL6	0.1594	0.1121	0.718819
Q9UHF1	Epidermal growth factor-like protein 7	OID42398	EGFL7	-0.1101	0.0286	0.303481
Q63HQ2	Pikachurin	OID43659	EGFLAM	-0.2012	0.0145	0.470757
P00533	Epidermal growth factor receptor	OID45115	EGFR	-0.0502	-0.0185	0.845023
Q9GZT9	Egl nine homolog 1	OID43660	EGLN1	0.0497	-0.3202	0.471692
Q8NDI1	EH domain-binding protein 1	OID44620	EHBP1	-0.0344	0.1056	0.718819
Q9Y6B2	EP300-interacting inhibitor of differentiation 1	OID40189	EID1	0.0753	-1.2538	0.0682541
Q9BQI3	Eukaryotic translation initiation factor 2-alpha kinase 1	OID40190	EIF2AK1	0.1375	0.2995	0.0682541
P19525	Interferon-induced, double-stranded RNA-activated protein kinase	OID43663	EIF2AK2	0.2693	-0.2373	0.471692
Q9UI10	Translation initiation factor eIF-2B subunit delta	OID43664	EIF2B4	0.3528	0.0743	0.471692
P41214	Eukaryotic translation initiation factor 2D	OID41150	EIF2D	0.7368	0.2123	0.167078
Q7L2H7	Eukaryotic translation initiation factor 3 subunit M	OID40192	EIF3M	4.047	1.6435	0.0682541
P23588	Eukaryotic translation initiation factor 4B	OID43666	EIF4B	1.3075	-0.1534	0.471817
P06730	Eukaryotic translation initiation factor 4E	OID43667	EIF4E	-0.547	0.8801	0.471927
Q13541	Eukaryotic translation initiation factor 4E-binding protein 1	OID44621	EIF4EBP1	1.7065	-0.1785	0.720134
Q15056	Eukaryotic translation initiation factor 4H	OID43670	EIF4H	-0.4138	-0.3422	0.471943
Q9GZV4	Eukaryotic translation initiation factor 5A-2	OID41153	EIF5A2	0.1345	-0.0055	0.16861
Q6IS14	Eukaryotic translation initiation factor 5A-1-like	OID40193	EIF5AL1	3.2791	2.7607	0.0684267
Q9H777	Zinc phosphodiesterase ELAC protein 1	OID43671	ELAC1	0.3319	0.0916	0.472445
P08246	Neutrophil elastase	OID45353	ELANE	0.7768	0.1092	0.95167
Q5R3F8	Protein phosphatase 1 regulatory subunit 29	OID42405	ELFN2	-0.4012	0.175	0.30362
Q14241	Elongin-A	OID43672	ELOA	0.6586	0.2906	0.472445
Q9NPA0	ER membrane protein complex subunit 7	OID40195	EMC7	-0.0026	-0.3161	0.0686516
Q96AY2	Crossover junction endonuclease EME1	OID40196	EME1	0.8932	-0.077	0.069207
O00423	Echinoderm microtubule-associated protein-like 1	OID40197	EML1	0.1815	0.3256	0.0693944
Q9HC35	Echinoderm microtubule-associated protein-like 4	OID43673	EML4	0.9232	0.2575	0.472637
Q05925	Homeobox protein engrailed-1	OID41159	EN1	5.1797	1.1219	0.169793
Q8N8S7	Protein enabled homolog	OID42408	ENAH	0.2752	0.0606	0.30362
O94919	Endonuclease domain-containing 1 protein	OID40199	ENDOD1	0.6403	0.2684	0.0710141
P21128	Uridylate-specific endoribonuclease	OID43674	ENDOU	-0.1387	0.2494	0.473008
P17813	Endoglin	OID45116	ENG	0.1249	0.1541	0.845023
P06733	Alpha-enolase	OID44624	ENO1	0.2992	0.4067	0.720134
P09104	Gamma-enolase	OID44625	ENO2	0.4202	0.1288	0.720164
P13929	Beta-enolase	OID43675	ENO3	-0.2063	0.057	0.473929
Q07075	Glutamyl aminopeptidase	OID42411	ENPEP	0.3809	-0.3389	0.30362
P22413	Ectonucleotide pyrophosphatase/phosphodiesterase family member 1	OID44626	ENPP1	-0.0003	-0.0296	0.720164
Q9UJA9	Ectonucleotide pyrophosphatase/phosphodiesterase family member 5	OID44627	ENPP5	-0.0837	-0.0056	0.720164
Q6UWR7	Glycerophosphocholine cholinephosphodiesterase ENPP6	OID43676	ENPP6	-0.1193	0.0226	0.474689
Q6UWV6	Ectonucleotide pyrophosphatase/phosphodiesterase family member 7	OID44628	ENPP7	-0.1222	-0.0036	0.720634
Q8IYW4	ENTH domain-containing protein 1	OID41160	ENTHD1	0.649	0.0138	0.169793
Q9Y5L3	Ectonucleoside triphosphate diphosphohydrolase 2	OID42413	ENTPD2	1.0166	0.3916	0.303955
O75356	Nucleoside diphosphate phosphatase ENTPD5	OID43677	ENTPD5	-0.2338	0.0161	0.475578
Q96C92	Endosome-associated-trafficking regulator 1	OID43679	ENTR1	0.6566	0.3026	0.476614
Q9NPA8	Transcription and mRNA export factor ENY2	OID41163	ENY2	0.8734	0.219	0.170072
Q99814	Endothelial PAS domain-containing protein 1	OID40202	EPAS1	0.0071	0.6059	0.0710854
Q9HCM4	Band 4.1-like protein 5	OID42416	EPB41L5	-2.847	2.2675	0.304309
P16422	Epithelial cell adhesion molecule	OID44629	EPCAM	-0.1099	0.1095	0.720776
Q9UM22	Mammalian ependymin-related protein 1	OID44630	EPDR1	-0.02	0.0404	0.720961
P21709	Ephrin type-A receptor 1	OID44631	EPHA1	-0.1375	0.0506	0.721624
P29317	Ephrin type-A receptor 2	OID43682	EPHA2	-0.011	0.0156	0.477291
P29320	Ephrin type-A receptor 3	OID40203	EPHA3	-0.1766	0.4921	0.0722098
P54764	Ephrin type-A receptor 4	OID44632	EPHA4	-0.2021	0.0316	0.721624
P54760	Ephrin type-B receptor 4	OID45118	EPHB4	0.066	0.0269	0.846612
O15197	Ephrin type-B receptor 6	OID43683	EPHB6	-0.0167	0.1035	0.478307
P01588	Erythropoietin	OID43684	EPO	-0.0162	0.073	0.478349
Q9H6S3	Epidermal growth factor receptor kinase substrate 8-like protein 2	OID43686	EPS8L2	-0.3296	0.1032	0.478349
P04626	Receptor tyrosine-protein kinase erbB-2	OID44633	ERBB2	-0.1047	0.0329	0.721676
P21860	Receptor tyrosine-protein kinase erbB-3	OID44634	ERBB3	-0.0881	-0.0118	0.722301
Q15303	Receptor tyrosine-protein kinase erbB-4	OID44635	ERBB4	0.1142	-0.0746	0.722301
Q96RT1	Erbin	OID43687	ERBIN	0.0839	0.1976	0.478349
O15083	ERC protein 2	OID42422	ERC2	0.4513	-0.4249	0.304675
Q92889	DNA repair endonuclease XPF	OID41167	ERCC4	0.221	0.2765	0.171647
Q2NKX8	DNA excision repair protein ERCC-6-like	OID40204	ERCC6L	-1.2929	-1.4736	0.0722111
Q8IV48	3'-5' exoribonuclease 1	OID42425	ERI1	0.3568	-0.1995	0.305687
Q86X53	Glutamate-rich protein 1	OID41168	ERICH1	1.0457	-0.1905	0.171647
Q5RHP9	Glutamate-rich protein 3	OID41169	ERICH3	0.7302	-1.7596	0.171647
O75460	Serine/threonine-protein kinase/endoribonuclease IRE1	OID43689	ERN1	0.2238	0.0801	0.478349
P30040	Endoplasmic reticulum resident protein 29	OID44636	ERP29	1.0315	0.2523	0.722992
Q9BS26	Endoplasmic reticulum resident protein 44	OID43690	ERP44	-0.2143	0.013	0.478349
Q9UJM3	ERBB receptor feedback inhibitor 1	OID41172	ERRFI1	-0.2438	0.2397	0.171694
O71037	Endogenous retrovirus group K member 19 Env polyprotein	OID41173	ERVK-19	-0.1202	0.034	0.171905
Q96AP7	Endothelial cell-selective adhesion molecule	OID45119	ESAM	-0.007	0.0219	0.848091
P58658	Protein eva-1 homolog C	OID43692	EVA1C	0.2839	0.0944	0.478349
Q9H790	Exonuclease V	OID41175	EXO5	0.1725	-0.147	0.171905
Q9NQT5	Exosome complex component RRP40	OID42434	EXOSC3	0.2089	-0.0306	0.305687
Q8NEV8	Exophilin-5	OID40213	EXPH5	-0.0837	-0.3441	0.0722642
O43909	Exostosin-like 3	OID41178	EXTL3	0.1491	-0.2421	0.172056
P15311	Ezrin	OID44639	EZR	0.2744	0.1038	0.723912
P00742	Coagulation factor X	OID45354	F10	0.0416	0.2192	0.951919
P03951	Coagulation factor XI	OID45355	F11	-0.1949	0.0649	0.951919
P00748	Coagulation factor XII	OID45461	F12	-0.7025	0.1054	0.986246
P05160	Coagulation factor XIII B chain	OID45462	F13B	-0.141	0.1313	0.986246
P0DMU3	FAM231A/C-like protein LOC102723383	OID40214	F231L	0.5499	-0.2214	0.0735002
P25116	Proteinase-activated receptor 1	OID44640	F2R	0.1897	0.114	0.723912
P13726	Tissue factor	OID43694	F3	-0.5504	0.1987	0.479701
P08709	Coagulation factor VII	OID45356	F7	0.009	0.0452	0.951919
P00740	Coagulation factor IX	OID45357	F9	0.0607	0.1048	0.951929
P07148	Fatty acid-binding protein, liver	OID44641	FABP1	-0.0709	0.123	0.724279
P12104	Fatty acid-binding protein, intestinal	OID44642	FABP2	0.01	-0.0051	0.725206
P05413	Fatty acid-binding protein, heart	OID44643	FABP3	-0.1273	0.0805	0.72525
P15090	Fatty acid-binding protein, adipocyte	OID45121	FABP4	-0.1194	0.0839	0.848091
Q01469	Fatty acid-binding protein 5	OID44644	FABP5	0.9605	0.2964	0.726521
P51161	Gastrotropin	OID43695	FABP6	-0.0493	-0.0021	0.479701
Q0Z7S8	Fatty acid-binding protein 9	OID42436	FABP9	0.5118	-0.5286	0.305964
Q13158	FAS-associated death domain protein	OID44645	FADD	0.8325	0.0963	0.728387
Q5XKR9	Protein FAM104B	OID41182	FAM104B	0.1521	-0.1691	0.172056
Q9NRY5	Protein FAM114A2	OID43696	FAM114A2	1.7108	0.35	0.479701
Q96EK7	Constitutive coactivator of peroxisome proliferator-activated receptor gamma	OID42439	FAM120B	-0.0498	-0.2204	0.305964
O94988	Protein FAM13A	OID43697	FAM13A	0.951	0.2542	0.480208
Q9NYF5	Protein FAM13B	OID41186	FAM13B	0.2274	-0.3234	0.172056
Q8NE31	Protein FAM13C	OID40217	FAM13C	-2.6258	0.1152	0.0735002
Q9UHL3	Protein FAM153A	OID40218	FAM153A	4.0048	0.2019	0.0735138
Q96KS9	Protein FAM167A	OID40220	FAM167A	-3.7131	1.6595	0.0736848
A8MVW0	Protein FAM171A2	OID43698	FAM171A2	-0.2844	0.0351	0.4824
Q6P995	Protein FAM171B	OID42440	FAM171B	-2.3621	1.5547	0.306697
Q8NB25	Protein FAM184A	OID41189	FAM184A	0.2836	-0.3604	0.172056
Q8IYM0	Protein FAM186B	OID40224	FAM186B	-1.8372	2.076	0.0739973
P78312	Protein FAM193A	OID41191	FAM193A	0.0041	-0.4019	0.172426
Q96MK3	Pseudokinase FAM20A	OID44646	FAM20A	-0.2324	0.112	0.728947
A4D161	Protein FAM221A	OID42441	FAM221A	0.3626	-0.4634	0.307145
F5H4B4	Protein FAM227A	OID40227	FAM227A	3.8101	-3.6325	0.0741062
Q96M60	Protein FAM227B	OID41193	FAM227B	-0.0379	0.0925	0.173181
P58499	Protein FAM3B	OID43700	FAM3B	-0.1181	-0.038	0.482968
Q92520	Protein FAM3C	OID44647	FAM3C	-0.1261	0.116	0.729173
Q96BQ1	Protein FAM3D	OID43701	FAM3D	-0.4142	0.0457	0.484077
Q5T0W9	Protein FAM83B	OID41196	FAM83B	1.028	0.2808	0.173181
A6NDY2	Putative protein FAM90A10	OID41197	FAM90A10	0.2804	-0.1034	0.176362
Q658Y4	Protein FAM91A1	OID41198	FAM91A1	-0.1011	0.0878	0.176975
Q12884	Prolyl endopeptidase FAP	OID45122	FAP	-0.053	-0.0028	0.848236
Q9Y285	Phenylalanine--tRNA ligase alpha subunit	OID42444	FARSA	1.9939	-0.093	0.307145
P25445	Tumor necrosis factor receptor superfamily member 6	OID45123	FAS	-0.0799	0.0273	0.848236
P98095	Fibulin-2	OID45124	FBLN2	0.0267	0.0555	0.849106
Q53RD9	Fibulin-7	OID44648	FBLN7	-0.4102	0.2778	0.729992
P09467	Fructose-1,6-bisphosphatase 1	OID44649	FBP1	1.1154	0.5736	0.729992
Q9UKA1	F-box/LRR-repeat protein 5	OID41202	FBXL5	-1.9025	0.3054	0.177094
Q9UJT9	F-box/LRR-repeat protein 7	OID40233	FBXL7	-0.9641	-0.1139	0.0741782
Q9NVF7	F-box only protein 28	OID42445	FBXO28	0.4369	0.1037	0.30802
Q5XUX0	F-box only protein 31	OID40234	FBXO31	-2.4777	2.7002	0.0741782
Q9NWN3	F-box only protein 34	OID40235	FBXO34	0.3459	-0.1684	0.0741782
Q9UH90	F-box only protein 40	OID40236	FBXO40	0.2228	-0.6126	0.0745166
Q8WWV6	High affinity immunoglobulin alpha and immunoglobulin mu Fc receptor	OID44650	FCAMR	0.1035	0.1119	0.730048
P24071	Immunoglobulin alpha Fc receptor	OID43704	FCAR	0.0523	0.353	0.484077
P06734	Low affinity immunoglobulin epsilon Fc receptor	OID45125	FCER2	-0.0932	0.231	0.849106
P12318	Low affinity immunoglobulin gamma Fc region receptor II-a	OID45358	FCGR2A	0.2482	0.2796	0.952428
O75015_P08637	Low affinity immunoglobulin gamma Fc region receptor III-A/B	OID45359	FCGR3B_FCGR3A	0.1341	0.0523	0.952657
O14526	F-BAR domain only protein 1	OID40238	FCHO1	-0.1231	-0.1301	0.0745166
Q0JRZ9	F-BAR domain only protein 2	OID42449	FCHO2	1.4148	0.2464	0.308859
O00602	Ficolin-1	OID45360	FCN1	0.0464	0.0669	0.953281
Q15485	Ficolin-2	OID45361	FCN2	-0.0495	-0.0829	0.953376
Q96LA6	Fc receptor-like protein 1	OID44651	FCRL1	0.085	0.0236	0.730183
Q96LA5	Fc receptor-like protein 2	OID43705	FCRL2	-0.1352	-0.037	0.484563
Q6BAA4	Fc receptor-like B	OID42451	FCRLB	-0.3919	0.0093	0.310444
Q6P4F2	Ferredoxin-2, mitochondrial	OID42453	FDX2	0.2512	0.4681	0.310563
P39748	Flap endonuclease 1	OID42454	FEN1	0.6405	0.2362	0.310742
Q9UGM5	Fetuin-B	OID45362	FETUB	0.3063	0.2546	0.953376
Q9UHY8	Fasciculation and elongation protein zeta-2	OID41207	FEZ2	0.163	-0.1418	0.17724
Q5JSP0	FYVE, RhoGEF and PH domain-containing protein 3	OID43707	FGD3	0.0392	-0.0576	0.484571
Q6ZV73	FYVE, RhoGEF and PH domain-containing protein 6	OID41209	FGD6	0.097	-2.4486	0.17724
P05230	Fibroblast growth factor 1	OID40241	FGF1	4.1124	1.5	0.0748827
O95750	Fibroblast growth factor 19	OID44652	FGF19	-0.0595	-0.1081	0.730183
Q9NSA1	Fibroblast growth factor 21	OID43710	FGF21	-0.5645	0.0087	0.484571
Q9GZV9	Fibroblast growth factor 23	OID43711	FGF23	-0.2066	0.0611	0.486072
P12034	Fibroblast growth factor 5	OID42458	FGF5	0.1198	-0.4228	0.310742
P31371	Fibroblast growth factor 9	OID42461	FGF9	-2.4459	-1.191	0.310887
Q14512	Fibroblast growth factor-binding protein 1	OID44653	FGFBP1	0.0658	0.1328	0.730183
Q9BYJ0	Fibroblast growth factor-binding protein 2	OID45127	FGFBP2	-0.0524	0.0418	0.849106
Q8TAT2	Fibroblast growth factor-binding protein 3	OID43713	FGFBP3	-0.3055	0.1812	0.486401
P21802	Fibroblast growth factor receptor 2	OID44654	FGFR2	-0.2839	0.1009	0.730183
P22455	Fibroblast growth factor receptor 4	OID44655	FGFR4	-0.0734	0.0097	0.730619
P09769	Tyrosine-protein kinase Fgr	OID42462	FGR	0.1411	-0.7946	0.310887
Q6PIW4	Fidgetin-like protein 1	OID41212	FIGNL1	3.5278	-1.8277	0.17724
Q96AY3	Peptidyl-prolyl cis-trans isomerase FKBP10	OID42466	FKBP10	0.1012	0.4367	0.310887
Q5T1M5	FK506-binding protein 15	OID42467	FKBP15	0.4543	0.1173	0.311709
Q02790	Peptidyl-prolyl cis-trans isomerase FKBP4	OID43717	FKBP4	0.0753	-0.0232	0.486401
Q9Y680	Peptidyl-prolyl cis-trans isomerase FKBP7	OID42468	FKBP7	0.7287	-0.0295	0.312154
Q9UIM3	FK506-binding protein-like	OID43719	FKBPL	0.6061	0.0328	0.486481
O43155	Leucine-rich repeat transmembrane protein FLRT2	OID43720	FLRT2	-0.2929	0.3393	0.486481
P17948	Vascular endothelial growth factor receptor 1	OID43721	FLT1	0.043	0.3839	0.486517
P36888	Receptor-type tyrosine-protein kinase FLT3	OID42471	FLT3	-0.2492	0.3046	0.312154
P49771	Fms-related tyrosine kinase 3 ligand	OID43722	FLT3LG	-0.1475	0.0318	0.488413
P35916	Vascular endothelial growth factor receptor 3	OID44657	FLT4	0.1113	0.0969	0.730619
Q96CP2	FLYWCH family member 2	OID42472	FLYWCH2	0.4601	-0.2715	0.312714
O95466	Formin-like protein 1	OID43723	FMNL1	0.1842	-0.1315	0.488772
Q8IVF7	Formin-like protein 3	OID41214	FMNL3	-0.1506	0.8399	0.17724
P02751	Fibronectin	OID45466	FN1	-0.2403	-0.0002	0.986477
Q96RU3	Formin-binding protein 1	OID44658	FNBP1	0.2495	-0.1226	0.730717
Q4ZHG4	Fibronectin type III domain-containing protein 1	OID43725	FNDC1	-0.1999	0.0106	0.490265
P49354	Protein farnesyltransferase/geranylgeranyltransferase type-1 subunit alpha	OID43726	FNTA	0.2869	0.2337	0.490377
Q04609	Glutamate carboxypeptidase 2	OID42474	FOLH1	0.1139	-0.1347	0.312714
P15328	Folate receptor alpha	OID44659	FOLR1	-0.0081	0.0012	0.73094
P14207	Folate receptor beta	OID44660	FOLR2	-0.002	0.0993	0.731083
P41439	Folate receptor gamma	OID44661	FOLR3	0.0298	0.0171	0.731501
P53539	Protein FosB	OID41215	FOSB	0.6517	0.6428	0.17724
Q01167	Forkhead box protein K2	OID41216	FOXK2	0.1908	-0.0903	0.17724
Q12952	Forkhead box protein L1	OID40249	FOXL1	0.0963	0.0008	0.0751136
Q12778	Forkhead box protein O1	OID43727	FOXO1	-0.2645	-0.2505	0.490468
Q8N878	FERM domain-containing protein 1	OID41218	FRMD1	-0.6715	-0.5357	0.177391
Q96NE9	FERM domain-containing protein 6	OID40252	FRMD6	-2.9357	0.0531	0.0751846
Q6IN97	Putative protein FRMPD2-like	OID40255	FRMPD2B	0.3459	-0.1684	0.0751846
Q8NA03	Fibrous sheath-interacting protein 1	OID41220	FSIP1	0.1479	0.0079	0.177391
Q12841	Follistatin-related protein 1	OID43730	FSTL1	0.0509	-0.0591	0.490945
P02792	Ferritin light chain	OID41221	FTL	0.344	-0.0759	0.177467
Q9C0B1	Alpha-ketoglutarate-dependent dioxygenase FTO	OID44664	FTO	0.4168	0.1473	0.733152
P04066	Tissue alpha-L-fucosidase	OID45128	FUCA1	-0.0293	0.2527	0.849779
A2VDF0	Fucose mutarotase	OID44665	FUOM	0.1001	0.1761	0.733152
P09958	Furin	OID44666	FURIN	-0.0147	-0.1381	0.733152
P35637	RNA-binding protein FUS	OID42481	FUS	0.4211	0.0013	0.312714
P19526	Galactoside alpha-(1,2)-fucosyltransferase 1	OID42482	FUT1	-0.1852	-0.0513	0.312714
P21217_Q11128	3-galactosyl-N-acetylglucosaminide 4-alpha-L-fucosyltransferase FUT3_4-galactosyl-N-acetylglucosaminide 3-alpha-L-fucosyltransferase FUT5	OID44667	FUT3_FUT5	-0.1587	-0.0506	0.733152
Q9BYC5	Alpha-(1,6)-fucosyltransferase	OID43732	FUT8	-0.11	0.0125	0.492908
Q16595	Frataxin, mitochondrial	OID43733	FXN	0.6665	0.3054	0.492908
O15117	FYN-binding protein 1	OID45129	FYB1	0.0612	-0.1037	0.850939
Q5VWT5	FYN-binding protein 2	OID41222	FYB2	1.3692	0.0462	0.178041
Q99259	Glutamate decarboxylase 1	OID42489	GAD1	2.1118	0.85	0.312714
O95257	Growth arrest and DNA damage-inducible protein GADD45 gamma	OID41225	GADD45G	-0.7533	-0.0675	0.178041
O14976	Cyclin-G-associated kinase	OID40260	GAK	3.2782	1.6712	0.0754127
P22466	Galanin peptides	OID44668	GAL	-0.3065	-0.3005	0.734375
Q01415	N-acetylgalactosamine kinase	OID41227	GALK2	-0.7487	0.4582	0.179211
Q96C23	Galactose mutarotase	OID44669	GALM	0.6845	0.3121	0.734375
Q86SR1	Polypeptide N-acetylgalactosaminyltransferase 10	OID43736	GALNT10	0.0294	-0.0759	0.493609
Q10471	Polypeptide N-acetylgalactosaminyltransferase 2	OID43737	GALNT2	-0.0925	0.1337	0.49391
Q7Z7M9	Polypeptide N-acetylgalactosaminyltransferase 5	OID44670	GALNT5	0.0535	-0.0164	0.734375
Q86SF2	N-acetylgalactosaminyltransferase 7	OID43738	GALNT7	-0.1176	0.0552	0.49483
Q14353	Guanidinoacetate N-methyltransferase	OID42494	GAMT	-0.8818	2.3883	0.312714
P04406	Glyceraldehyde-3-phosphate dehydrogenase	OID44671	GAPDH	-0.0228	-0.0167	0.735158
Q75VX8	GRB2-associated and regulator of MAPK protein 2	OID41229	GAREM2	-0.3147	-0.4341	0.179919
Q8N9W8	Golgi-associated RAB2 interactor protein 2	OID41231	GARIN2	0.0215	-0.0209	0.180271
P54826	Growth arrest-specific protein 1	OID41234	GAS1	0.017	0.1613	0.180271
Q14393	Growth arrest-specific protein 6	OID45130	GAS6	0.0166	0.0445	0.851664
O60861	Growth arrest-specific protein 7	OID41236	GAS7	-0.0691	-0.2879	0.180296
O95995	Dynein regulatory complex subunit 4	OID40262	GAS8	-3.044	-0.3413	0.0754346
Q9UFP1	Golgi-associated kinase 1A	OID42496	GASK1A	0.2713	-0.0527	0.312714
P04062	Lysosomal acid glucosylceramidase	OID43742	GBA1	0.5183	-0.0229	0.495698
Q92538	Golgi-specific brefeldin A-resistance guanine nucleotide exchange factor 1	OID40263	GBF1	-0.6086	-1.2383	0.0754346
P32455	Guanylate-binding protein 1	OID44673	GBP1	0.4717	0.167	0.735158
P32456	Guanylate-binding protein 2	OID42499	GBP2	0.4321	0.3948	0.312714
Q9H0R5	Guanylate-binding protein 3	OID41239	GBP3	-0.0331	0.3937	0.180296
P02774	Vitamin D-binding protein	OID45467	GC	-0.0526	-0.0222	0.987193
Q96CN9	GRIP and coiled-coil domain-containing protein 1	OID43744	GCC1	0.6186	0.1414	0.49583
P30047	GTP cyclohydrolase 1 feedback regulatory protein	OID44674	GCHFR	0.17	0.2838	0.735158
P35557	Hexokinase-4	OID41241	GCK	-1.0569	-0.3116	0.18109
Q02742	Beta-1,3-galactosyl-O-glycosyl-glycoprotein beta-1,6-N-acetylglucosaminyltransferase	OID43745	GCNT1	0.2029	0.1715	0.49583
Q9NXN4	Ganglioside-induced differentiation-associated protein 2	OID41244	GDAP2	-0.8993	0.0654	0.18143
Q9UK05	Growth/differentiation factor 2	OID44675	GDF2	0.2609	0.1816	0.735158
Q8N9F7	Lysophospholipase D GDPD1	OID40264	GDPD1	-0.0785	-1.2247	0.0754605
O43681	ATPase GET3	OID44676	GET3	0.2643	0.0123	0.735158
P14136	Glial fibrillary acidic protein	OID42508	GFAP	0.0401	0.0835	0.312714
Q3B7J2	Glucose-fructose oxidoreductase domain-containing protein 2	OID42510	GFOD2	0.2267	-0.1391	0.312714
P56159	GDNF family receptor alpha-1	OID43746	GFRA1	-0.0274	0.112	0.49583
O00451	GDNF family receptor alpha-2	OID43747	GFRA2	-0.1759	0	0.49583
Q6UXV0	GDNF family receptor alpha-like	OID43749	GFRAL	0.2065	-0.1409	0.495927
Q9UJY4	ADP-ribosylation factor-binding protein GGA2	OID40265	GGA2	3.0254	1.5942	0.0754784
Q9NZ52	ADP-ribosylation factor-binding protein GGA3	OID42512	GGA3	0.7137	0.1436	0.312714
O75223	Gamma-glutamylcyclotransferase	OID44678	GGCT	1.1458	0.1267	0.735158
Q92820	Gamma-glutamyl hydrolase	OID45364	GGH	-0.0231	0.0367	0.953376
P19440	Glutathione hydrolase 1 proenzyme	OID45132	GGT1	-0.1398	0.1576	0.852364
P36269	Glutathione hydrolase 5 proenzyme	OID43750	GGT5	-0.0695	0.0907	0.495927
P01242	Growth hormone variant	OID42514	GH2	-0.7901	0.8839	0.312714
P10912	Growth hormone receptor	OID44680	GHR	0.0076	0.0312	0.736062
O75420	GRB10-interacting GYF protein 1	OID41247	GIGYF1	-0.0251	-0.001	0.18143
Q8NHV1	GTPase IMAP family member 7	OID44682	GIMAP7	0.9357	-0.2536	0.736654
Q8ND71	GTPase IMAP family member 8	OID42516	GIMAP8	0.0341	0.1268	0.312714
Q8TF65	PDZ domain-containing protein GIPC2	OID43754	GIPC2	0.2444	-0.1323	0.497016
Q9Y2X7	ARF GTPase-activating protein GIT1	OID43757	GIT1	-0.0294	-0.1054	0.497016
Q5VSY0	G kinase-anchoring protein 1	OID40267	GKAP1	1.1072	-0.0973	0.075539
Q9NS71	Gastrokine-1	OID43758	GKN1	0.0328	-0.0397	0.497016
P16278	Beta-galactosidase	OID43759	GLB1	0.268	0.1054	0.497593
P48060	Glioma pathogenesis-related protein 1	OID43760	GLIPR1	-0.0977	-0.0067	0.49826
Q04760	Lactoylglutathione lyase	OID43761	GLO1	0.4544	0.0968	0.499318
P35754	Glutaredoxin-1	OID44685	GLRX	0.2271	0.0367	0.736654
Q49A26	Cytokine-like nuclear factor N-PAC	OID43763	GLYR1	0.5102	-0.3156	0.499546
P17900	Ganglioside GM2 activator	OID45133	GM2A	0.2073	0.0555	0.852689
P36959	GMP reductase 1	OID43764	GMPR	-0.2279	-0.1365	0.500017
Q9P2T1	GMP reductase 2	OID44688	GMPR2	0.3473	0.1943	0.736654
Q9NVN8	Guanine nucleotide-binding protein-like 3-like protein	OID41251	GNL3L	0.3546	-0.5228	0.18143
P22749	Granulysin	OID45134	GNLY	0.3642	-0.0991	0.852895
Q8TDQ7	Glucosamine-6-phosphate isomerase 2	OID44689	GNPDA2	0.3024	0.0967	0.737698
Q9NYA3	Golgin subfamily A member 6A	OID42526	GOLGA6A	0.4033	-0.0575	0.312714
A6NEF3_A6NEM1_A6NI86	Putative golgin subfamily A member 6-like protein 3	OID40271	GOLGA6L4_GOLGA6L9_GOLGA6L10	-1.2277	1.6572	0.0763112
A6NN73	Golgin subfamily A member 8C	OID40272	GOLGA8CP	7.0208	-3.257	0.0766063
Q6P4E1	Protein GOLM2	OID44690	GOLM2	-0.0177	0.0052	0.737783
Q9H8Y8	Golgi reassembly-stacking protein 2	OID43769	GORASP2	0.772	0.2783	0.500473
P17174	Aspartate aminotransferase, cytoplasmic	OID45135	GOT1	0.3279	0.0825	0.852895
P55259	Pancreatic secretory granule membrane major glycoprotein GP2	OID43771	GP2	0.0708	0.0903	0.500548
P40197	Platelet glycoprotein V	OID44691	GP5	-0.1251	-0.123	0.738096
Q99795	Cell surface A33 antigen	OID43772	GPA33	-0.2394	0.1347	0.501692
Q8N954	G patch domain-containing protein 11	OID41257	GPATCH11	0.3363	-0.3977	0.18143
Q5T3I0	G patch domain-containing protein 4	OID41258	GPATCH4	5.6536	-1.0172	0.18143
Q9UKJ3	G patch domain-containing protein 8	OID41259	GPATCH8	-0.1298	-0.2062	0.18143
P78333	Glypican-5	OID43774	GPC5	0.046	0.133	0.502137
P21695	Glycerol-3-phosphate dehydrogenase [NAD(+)], cytoplasmic	OID43775	GPD1	0.5968	0.4661	0.502137
Q96T91	Glycoprotein hormone alpha-2	OID43776	GPHA2	-0.3099	0.1425	0.502359
P06744	Glucose-6-phosphate isomerase	OID45366	GPI	0.368	0.3075	0.953376
Q8IV16	Glycosylphosphatidylinositol-anchored high density lipoprotein-binding protein 1	OID43777	GPIHBP1	-0.2128	-0.1409	0.504541
Q92917	G-patch domain and KOW motifs-containing protein	OID43778	GPKOW	0.054	0.2575	0.504653
Q14956	Transmembrane glycoprotein NMB	OID44692	GPNMB	0.0267	0.0107	0.738096
Q8IZ08	G-protein coupled receptor 135	OID40274	GPR135	0.7293	-0.0383	0.0766063
Q6UWK7	Protein GPR15LG	OID43780	GPR15LG	-0.2933	-0.4739	0.50682
O15354	Prosaposin receptor GPR37	OID43781	GPR37	-0.6272	-0.4933	0.507019
Q9NQ84	G-protein coupled receptor family C group 5 member C	OID42531	GPRC5C	0.0105	0.08	0.313179
O60269	G protein-regulated inducer of neurite outgrowth 2	OID41263	GPRIN2	2.371	1.8473	0.182089
Q6ZVF9	G protein-regulated inducer of neurite outgrowth 3	OID41264	GPRIN3	-0.5273	0.2638	0.182089
Q9Y4H4	G-protein-signaling modulator 3	OID40275	GPSM3	-0.8682	-0.1869	0.0766775
P07203	Glutathione peroxidase 1	OID44693	GPX1	0.6234	0.3355	0.738096
Q4V328	GRIP1-associated protein 1	OID42536	GRIPAP1	0.2568	-0.0173	0.313338
P34947	G protein-coupled receptor kinase 5	OID42537	GRK5	1.6617	-0.0659	0.313948
P28799	Progranulin	OID45137	GRN	-0.0198	0.0306	0.852895
P07492	Gastrin-releasing peptide	OID43782	GRP	-0.479	-0.063	0.507417
Q9HAV7	GrpE protein homolog 1, mitochondrial	OID43783	GRPEL1	0.4647	0.331	0.507836
A4D1B5	Gamma-secretase-activating protein	OID42539	GSAP	0.2848	-1.1421	0.315764
P57764	Gasdermin-D	OID40277	GSDMD	1.2079	0.2142	0.0766775
P06396	Gelsolin	OID45367	GSN	0.2565	0.1557	0.953376
P15170	Eukaryotic peptide chain release factor GTP-binding subunit ERF3A	OID41270	GSPT1	-0.4627	0.8556	0.182527
P00390	Glutathione reductase, mitochondrial	OID45368	GSR	-0.0276	0.1531	0.953376
P08263	Glutathione S-transferase A1	OID44696	GSTA1	-0.0456	-0.0543	0.738096
Q16772	Glutathione S-transferase A3	OID42540	GSTA3	-0.1175	0.1755	0.315861
Q03013	Glutathione S-transferase Mu 4	OID42541	GSTM4	0.6566	0.6515	0.318155
P09211	Glutathione S-transferase P	OID42542	GSTP1	1.3968	0.5526	0.318155
P0CG30	Glutathione S-transferase theta-2B	OID43784	GSTT2B	-0.5962	0.3258	0.507836
Q86UP8	General transcription factor II-I repeat domain-containing protein 2A	OID41271	GTF2IRD2	0.7122	-1.6445	0.18256
Q9H1H1	Gametocyte-specific factor 1-like	OID40280	GTSF1L	1.1338	-0.7311	0.0767029
Q02747	Guanylin	OID45138	GUCA2A	-0.086	-0.0298	0.852916
P25092	Guanylyl cyclase C	OID42546	GUCY2C	0.1244	-0.2318	0.318155
Q16774	Guanylate kinase	OID42547	GUK1	-1.8203	0.1869	0.319326
P08236	Beta-glucuronidase	OID45139	GUSB	0.0639	0.1264	0.852916
P02724	Glycophorin-A	OID40281	GYPA	-1.0675	1.0039	0.0767029
P13807	Glycogen [starch] synthase, muscle	OID43785	GYS1	0.9299	0.1763	0.507836
P12544	Granzyme A	OID43786	GZMA	0.2708	0.0534	0.507836
P20718	Granzyme H	OID43788	GZMH	1.0784	0.0574	0.508368
Q02539	Histone H1.1	OID42548	H1-1	0.4729	-0.2719	0.319326
P22492	Histone H1t	OID41277	H1-6	-0.0924	0.1076	0.18256
P46952	3-hydroxyanthranilate 3,4-dioxygenase	OID44697	HAAO	0.194	0.2706	0.738096
Q14520	Hyaluronan-binding protein 2	OID45468	HABP2	-0.475	0.3649	0.987193
P12081	Histidine--tRNA ligase, cytoplasmic	OID45140	HARS1	0.2115	0.1915	0.852916
Q96D42	Hepatitis A virus cellular receptor 1	OID43791	HAVCR1	-0.0869	-0.0538	0.509021
Q8TDQ0	Hepatitis A virus cellular receptor 2	OID45141	HAVCR2	-0.1804	0.2136	0.853251
Q99075	Proheparin-binding EGF-like growth factor	OID43792	HBEGF	0.0162	0.0843	0.509501
P09105	Hemoglobin subunit theta-1	OID43793	HBQ1	1.9621	0.382	0.509501
Q9Y450	HBS1-like protein	OID42551	HBS1L	0.0877	0.1367	0.319338
Q9Y5Z7	Host cell factor 2	OID42552	HCFC2	-0.5307	0	0.319601
P14317	Hematopoietic lineage cell-specific protein	OID43794	HCLS1	-0.176	-0.5853	0.509677
Q9UBN7	Histone deacetylase 6	OID41281	HDAC6	2.19	-1.8122	0.182579
P51858	Hepatoma-derived growth factor	OID43796	HDGF	0.1274	-0.1015	0.509915
Q7Z4V5	Hepatoma-derived growth factor-related protein 2	OID43797	HDGFL2	0.2533	-0.1634	0.509915
Q86WZ0	HEAT repeat-containing protein 4	OID41284	HEATR4	-0.9699	-0.3957	0.183682
Q9UBI9	Headcase protein homolog	OID41285	HECA	-0.1606	-0.2339	0.183996
Q9ULI3	Protein HEG homolog 1	OID44699	HEG1	-0.0827	0.0538	0.738096
Q8NG08	DNA helicase B	OID40285	HELB	0.087	0.0568	0.0767029
A8MVW5	HEPACAM family member 2	OID43798	HEPACAM2	-0.153	-0.2161	0.510215
Q9BQS7	Hephaestin	OID44700	HEPH	-0.1949	0.0445	0.738096
O94992	Protein HEXIM1	OID43799	HEXIM1	-0.0658	-0.1671	0.510237
P14210	Hepatocyte growth factor	OID43800	HGF	-0.0243	0.2385	0.511118
Q04756	Hepatocyte growth factor activator	OID45369	HGFAC	-0.1595	0.0856	0.954013
Q03014	Hematopoietically-expressed homeobox protein HHEX	OID43801	HHEX	0.6245	0.1914	0.511118
C9JL84	HERV-H LTR-associating protein 1	OID40287	HHLA1	2.0693	-0.3249	0.0768261
O75146	Huntingtin-interacting protein 1-related protein	OID43802	HIP1R	1.3878	0.2196	0.511118
Q9H422	Homeodomain-interacting protein kinase 3	OID40288	HIPK3	0.1505	-1.388	0.0768261
Q6ZVN8	Hemojuvelin	OID43803	HJV	-0.3632	0.0703	0.511185
P04439	HLA class I histocompatibility antigen, A alpha chain	OID43804	HLA-A	0.0134	0.0898	0.512143
Q16534	Hepatic leukemia factor	OID41294	HLF	-1.8795	-2.2256	0.183996
P08397	Porphobilinogen deaminase	OID43807	HMBS	0.381	0.071	0.512358
Q8NDA2	Hemicentin-2	OID44702	HMCN2	-0.096	0.1207	0.738096
P09601	Heme oxygenase 1	OID44703	HMOX1	-0.0598	0.0449	0.738096
P30519	Heme oxygenase 2	OID43809	HMOX2	0.3076	0.084	0.513392
P20823	Hepatocyte nuclear factor 1-alpha	OID42568	HNF1A	-0.3707	0.4175	0.320856
P41235	Hepatocyte nuclear factor 4-alpha	OID40290	HNF4A	-1.3922	0.5759	0.0773672
P50135	Histamine N-methyltransferase	OID43810	HNMT	-0.0731	0.3904	0.514642
Q13151	Heterogeneous nuclear ribonucleoprotein A0	OID42569	HNRNPA0	0.2545	-0.3609	0.322347
P61978	Heterogeneous nuclear ribonucleoprotein K	OID41296	HNRNPK	1.4952	-0.9478	0.184171
Q9BUJ2	Heterogeneous nuclear ribonucleoprotein U-like protein 1	OID43811	HNRNPUL1	0.3335	-0.5156	0.515568
Q9NSC5	Homer protein homolog 3	OID43812	HOMER3	-0.1026	-0.1308	0.515743
Q96ED9	Protein Hook homolog 2	OID43813	HOOK2	-0.163	0.0824	0.515743
O43364	Homeobox protein Hox-A2	OID41298	HOXA2	-0.9153	1.2107	0.184338
P14651	Homeobox protein Hox-B3	OID41299	HOXB3	-0.3409	-0.7205	0.184338
P28356	Homeobox protein Hox-D9	OID41302	HOXD9	-1.7197	-1.1689	0.184338
Q9UM19	Hippocalcin-like protein 4	OID42571	HPCAL4	-0.0091	-0.1262	0.322521
P32754	4-hydroxyphenylpyruvate dioxygenase	OID45142	HPD	0.2313	0.07	0.853251
O60760	Hematopoietic prostaglandin D synthase	OID42572	HPGDS	-0.2654	-0.0649	0.322521
Q9Y251	Heparanase	OID45143	HPSE	-0.0327	-0.0111	0.853435
P23327	Sarcoplasmic reticulum histidine-rich calcium-binding protein	OID43815	HRC	0.2419	0.1	0.515743
P04196	Histidine-rich glycoprotein	OID45469	HRG	-0.485	0.1122	0.987193
Q53T59	HCLS1-binding protein 3	OID43816	HS1BP3	0.7212	-0.1984	0.515743
Q9Y662	Heparan sulfate glucosamine 3-O-sulfotransferase 3B1	OID43817	HS3ST3B1	-0.245	0.0697	0.51659
O60243	Heparan-sulfate 6-O-sulfotransferase 1	OID43818	HS6ST1	0.3491	-0.1337	0.517505
P28845	11-beta-hydroxysteroid dehydrogenase 1	OID43820	HSD11B1	0.1452	0.1849	0.517505
Q53GQ0	Very-long-chain 3-oxoacyl-CoA reductase	OID40293	HSD17B12	0.3459	-0.1684	0.0773672
Q9BPX1	17-beta-hydroxysteroid dehydrogenase 14	OID43821	HSD17B14	0.1259	0.1677	0.517505
P37058	17-beta-hydroxysteroid dehydrogenase type 3	OID42576	HSD17B3	-5.6135	-0.3655	0.322521
Q6YN16	Hydroxysteroid dehydrogenase-like protein 2	OID43822	HSDL2	-0.0863	0.4619	0.520145
Q9UBD0	Heat shock transcription factor, X-linked	OID40295	HSFX1_HSFX2	2.2272	1.5007	0.0773672
Q96JZ2	Hematopoietic SH2 domain-containing protein	OID41305	HSH2D	-0.1129	0.2523	0.184395
Q58FF6	Putative heat shock protein HSP 90-beta 4	OID41306	HSP90AB4P	3.4487	0.0671	0.184545
P48723	Heat shock 70 kDa protein 13	OID43823	HSPA13	-0.1022	0.1509	0.520178
P04792	Heat shock protein beta-1	OID45144	HSPB1	0.875	0.1403	0.853435
O14558	Heat shock protein beta-6	OID43825	HSPB6	-0.1299	0.1604	0.520543
Q96EW2	HSPB1-associated protein 1	OID41308	HSPBAP1	0.5593	-0.0055	0.184803
P98160	Basement membrane-specific heparan sulfate proteoglycan core protein	OID45370	HSPG2	-0.0952	0.029	0.954013
P08908	5-hydroxytryptamine receptor 1A	OID42578	HTR1A	0.0202	-0.07	0.322521
O43464	Serine protease HTRA2, mitochondrial	OID44706	HTRA2	0.1002	0.0757	0.738096
Q96M11	Centriolar and ciliogenesis-associated protein HYLS1	OID40298	HYLS1	0.1938	-0.5827	0.0773672
Q9Y4L1	Hypoxia up-regulated protein 1	OID45145	HYOU1	-0.0323	0.0651	0.853435
Q2TAA2	Isoamyl acetate-hydrolyzing esterase 1 homolog	OID44707	IAH1	0.4432	0.1299	0.738096
Q05084	Islet cell autoantigen 1	OID42580	ICA1	0.5755	0.041	0.322785
P05362	Intercellular adhesion molecule 1	OID45372	ICAM1	-0.1139	0.0884	0.95436
P13598	Intercellular adhesion molecule 2	OID45146	ICAM2	0.0314	0.0476	0.853435
P32942	Intercellular adhesion molecule 3	OID45147	ICAM3	-0.0793	0.053	0.853435
Q9UMF0	Intercellular adhesion molecule 5	OID44708	ICAM5	-0.188	-0.051	0.738096
O75144	ICOS ligand	OID43828	ICOSLG	-0.0773	0.1092	0.520734
P14902	Indoleamine 2,3-dioxygenase 1	OID43829	IDO1	0.5507	0.0892	0.522689
P22304	Iduronate 2-sulfatase	OID43830	IDS	-0.0616	0.0969	0.524283
P35475	Alpha-L-iduronidase	OID43831	IDUA	0.1446	0.3291	0.524283
P13284	Gamma-interferon-inducible lysosomal thiol reductase	OID43832	IFI30	0.6809	0.0282	0.524306
Q9BYX4	Interferon-induced helicase C domain-containing protein 1	OID41313	IFIH1	2.3867	-0.5079	0.184904
P09914	Interferon-induced protein with tetratricopeptide repeats 1	OID42583	IFIT1	-0.16	-1.0858	0.324327
P01563	Interferon alpha-2	OID40301	IFNA2	2.1871	-2.0096	0.0773672
P17181	Interferon alpha/beta receptor 1	OID43833	IFNAR1	0.0605	0.1981	0.524306
P48551	Interferon alpha/beta receptor 2	OID45148	IFNAR2	-0.1174	0.0654	0.853938
P01574	Interferon beta	OID40302	IFNB1	2.6772	-0.6277	0.0773672
P01579	Interferon gamma	OID42585	IFNG	0.9383	-0.9895	0.324327
P15260	Interferon gamma receptor 1	OID44709	IFNGR1	0.1447	0.1448	0.738413
K9M1U5	Interferon lambda-4	OID40303	IFNL4	0.3662	0.7445	0.0773672
Q8IU57	Interferon lambda receptor 1	OID43835	IFNLR1	-0.1404	-0.0233	0.526336
Q12894	Interferon-related developmental regulator 2	OID41315	IFRD2	5.7517	-2.5196	0.184904
Q96FT9	Intraflagellar transport protein 43 homolog	OID41317	IFT43	0.2751	-0.0876	0.184992
Q8WYA0	Intraflagellar transport protein 81 homolog	OID41319	IFT81	0.1348	-0.0488	0.185249
Q86VG3	Intraflagellar transport-associated protein	OID41321	IFTAP	0.5396	-1.5041	0.18582
P78318	Immunoglobulin-binding protein 1	OID43836	IGBP1	0.8397	0.004	0.526336
Q8TDY8	Immunoglobulin superfamily DCC subclass member 4	OID45149	IGDCC4	0.0098	-0.0995	0.853995
O00425	Insulin-like growth factor 2 mRNA-binding protein 3	OID42591	IGF2BP3	0.429	0.0418	0.324327
P11717	Cation-independent mannose-6-phosphate receptor	OID45150	IGF2R	0.0084	-0.0443	0.854404
P08833	Insulin-like growth factor-binding protein 1	OID45151	IGFBP1	0.2052	0.0805	0.854452
P18065	Insulin-like growth factor-binding protein 2	OID45152	IGFBP2	0.1115	0.0785	0.854652
P17936	Insulin-like growth factor-binding protein 3	OID45373	IGFBP3	0.047	0.0827	0.955707
P22692	Insulin-like growth factor-binding protein 4	OID45153	IGFBP4	-0.0857	-0.0198	0.854833
P24592	Insulin-like growth factor-binding protein 6	OID45374	IGFBP6	-0.2181	-0.0039	0.955805
Q16270	Insulin-like growth factor-binding protein 7	OID45154	IGFBP7	-0.1277	0.0069	0.855217
Q8WX77	Insulin-like growth factor-binding protein-like 1	OID44710	IGFBPL1	-0.1061	-0.0308	0.738636
Q6UXB1	Insulin growth factor-like family member 3	OID44711	IGFL3	0.0625	-0.0169	0.738636
Q6B9Z1	Insulin growth factor-like family member 4	OID43838	IGFL4	0.106	0.0476	0.527626
P0DOY2	Immunoglobulin lambda constant 2	OID45470	IGLC2	-0.0575	0.1434	0.987517
Q5DX21	Immunoglobulin superfamily member 11	OID40305	IGSF11	2.0667	-3.2929	0.0785924
Q96ID5	Immunoglobulin superfamily member 21	OID43839	IGSF21	0.1656	0.0085	0.527626
Q8N9C0	Immunoglobulin superfamily member 22	OID41323	IGSF22	0.6528	0.1667	0.18582
O75054	Immunoglobulin superfamily member 3	OID43840	IGSF3	-0.1428	0.0261	0.527626
Q969P0	Immunoglobulin superfamily member 8	OID44712	IGSF8	0.0489	0.0144	0.738636
Q9P2J2	Protein turtle homolog A	OID44713	IGSF9	-0.0172	0.0184	0.738636
P22301	Interleukin-10	OID42595	IL10	-0.171	0.5481	0.324327
Q08334	Interleukin-10 receptor subunit beta	OID44714	IL10RB	-0.2257	0.0735	0.738636
P29459_P29460	Interleukin-12	OID43842	IL12A_IL12B	-0.1693	-0.0084	0.527626
P42701	Interleukin-12 receptor subunit beta-1	OID42598	IL12RB1	0.8811	-0.4036	0.324327
P78552	Interleukin-13 receptor subunit alpha-1	OID44715	IL13RA1	-0.1762	-0.0765	0.738636
P40933	Interleukin-15	OID43844	IL15	-0.228	0.0222	0.527626
Q14005	Pro-interleukin-16	OID43845	IL16	0.2991	-0.0569	0.527626
Q16552	Interleukin-17A	OID42603	IL17A	-0.3848	-0.1153	0.324327
Q9P0M4	Interleukin-17C	OID42604	IL17C	0.1117	-0.2733	0.324802
Q8TAD2	Interleukin-17D	OID42605	IL17D	-0.3329	0.0371	0.324802
Q9NRM6	Interleukin-17 receptor B	OID43846	IL17RB	-0.35	0.1569	0.528951
Q14116	Interleukin-18	OID44716	IL18	0.0933	0.0928	0.738636
O95998	Interleukin-18-binding protein	OID45375	IL18BP	-0.0706	0.1057	0.956689
Q13478	Interleukin-18 receptor 1	OID43847	IL18R1	-0.12	0.0612	0.528951
Q9UHD0	Interleukin-19	OID44717	IL19	0.0354	0.0415	0.738636
P27930	Interleukin-1 receptor type 2	OID44718	IL1R2	-0.1657	-0.0461	0.738636
Q9NPH3	Interleukin-1 receptor accessory protein	OID45157	IL1RAP	0.1213	-0.0717	0.855427
Q01638	Interleukin-1 receptor-like 1	OID45158	IL1RL1	0.1782	-0.057	0.856229
Q9HB29	Interleukin-1 receptor-like 2	OID42609	IL1RL2	0.1642	0.1131	0.324802
P18510	Interleukin-1 receptor antagonist protein	OID44719	IL1RN	0.0985	0.2201	0.738997
Q9GZX6	Interleukin-22	OID43849	IL22	-0.5483	0.2259	0.528951
Q8N6P7	Interleukin-22 receptor subunit alpha-1	OID42615	IL22RA1	-0.031	-0.3402	0.324802
P01589	Interleukin-2 receptor subunit alpha	OID45159	IL2RA	0.0035	0.0421	0.856598
P08700	Interleukin-3	OID42619	IL3	-2.506	0.6528	0.325176
Q6EBC2	Interleukin-31	OID42620	IL31	0.9752	1.1725	0.325217
P24001	Interleukin-32	OID43852	IL32	-0.3708	-0.0244	0.528951
Q9NZH7	Interleukin-36 beta	OID42625	IL36B	0.1074	0.3672	0.325761
Q9NZH8	Interleukin-36 gamma	OID43853	IL36G	-0.0931	0.3049	0.528951
P24394	Interleukin-4 receptor subunit alpha	OID43854	IL4R	0.0193	0.2444	0.528951
Q01344	Interleukin-5 receptor subunit alpha	OID43855	IL5RA	-0.0615	0.0979	0.529165
P05231	Interleukin-6	OID43856	IL6	0.3932	0.2372	0.529181
P08887	Interleukin-6 receptor subunit alpha	OID45376	IL6R	0.0737	-0.0065	0.956689
P40189	Interleukin-6 receptor subunit beta	OID44720	IL6ST	-0.0166	0.0039	0.739315
P13232	Interleukin-7	OID43857	IL7	-0.4859	0.0173	0.529218
P16871	Interleukin-7 receptor subunit alpha	OID45160	IL7R	0.0336	-0.066	0.856598
Q9H0C8	Integrin-linked kinase-associated serine/threonine phosphatase 2C	OID42630	ILKAP	0.9815	-0.1819	0.326023
Q16891	MICOS complex subunit MIC60	OID43858	IMMT	-0.0437	0.3299	0.529352
P29218	Inositol monophosphatase 1	OID43859	IMPA1	-0.0614	0.0199	0.529908
Q9P2X3	Protein IMPACT	OID43860	IMPACT	0.5422	0.0645	0.529908
Q9GZP8	Immortalization up-regulated protein	OID45161	IMUP	0.2692	-0.3299	0.857372
Q9H160	Inhibitor of growth protein 2	OID41327	ING2	-0.3769	0.4579	0.185906
P09529	Inhibin beta B chain	OID44721	INHBB	-0.0454	-0.0486	0.739315
P55103	Inhibin beta C chain	OID45162	INHBC	-0.1871	-0.0269	0.85791
Q96EL1	PAK4-inhibitor INKA1	OID41328	INKA1	0.3203	0.5229	0.186327
Q9ULG1	Chromatin-remodeling ATPase INO80	OID41329	INO80	0.3049	-0.0326	0.186327
Q92835	Phosphatidylinositol 3,4,5-trisphosphate 5-phosphatase 1	OID43862	INPP5D	-0.0262	-0.2829	0.529908
Q9Y2H2	Phosphatidylinositide phosphatase SAC2	OID40310	INPP5F	-0.5879	0.165	0.0785924
Q15735	Phosphatidylinositol 4,5-bisphosphate 5-phosphatase A	OID42634	INPP5J	-0.4793	0.1084	0.326068
P01308	Insulin C-peptide	OID44722	INS-CPEPTIDE	-0.1645	-1.9593	0.739315
Q9NVM9	Integrator complex subunit 13	OID41332	INTS13	-0.7354	2.5561	0.186513
Q92551	Inositol hexakisphosphate kinase 1	OID41334	IP6K1	0.6522	-1.6545	0.186529
Q8WWN9	Interactor protein for cytohesin exchange factors 1	OID43868	IPCEF1	-0.05	-0.4177	0.529908
Q86XH1	Dynein regulatory complex protein 11	OID40313	IQCA1	0.2518	0.0957	0.0785924
A6NCM1	IQ and AAA domain-containing protein 1-like	OID40314	IQCA1L	3.0812	-0.4358	0.0785924
Q4KMZ1	IQ domain-containing protein C	OID42635	IQCC	-0.1793	0.3772	0.326068
Q6IPM2	IQ domain-containing protein E	OID41337	IQCE	1.146	-0.445	0.186625
B3KU38	IQCJ-SCHIP1 readthrough transcript protein	OID41339	IQCJ-SCHIP1	-0.6838	0.8657	0.186625
Q9H0B3	IQ domain-containing protein N	OID41340	IQCN	0.023	-0.0865	0.187442
Q6DN90	IQ motif and SEC7 domain-containing protein 1	OID41341	IQSEC1	0.2421	-0.1952	0.188444
Q9NWZ3	Interleukin-1 receptor-associated kinase 4	OID43871	IRAK4	0.5222	0.1153	0.529972
Q7Z5L9	Interferon regulatory factor 2-binding protein 2	OID41343	IRF2BP2	0.6391	0.1837	0.188715
Q8WZA9	Immunity-related GTPase family Q protein	OID41345	IRGQ	0.5902	0.0858	0.188821
Q6UXK2	Immunoglobulin superfamily containing leucine-rich repeat protein 2	OID43872	ISLR2	0.0225	0.0731	0.530136
B1AKI9	Isthmin-1	OID43873	ISM1	-0.1112	-0.0385	0.530136
P08648	Integrin alpha-5	OID45164	ITGA5	0.2689	-0.1236	0.857954
P23229	Integrin alpha-6	OID43876	ITGA6	-0.1772	-0.0719	0.530136
Q13349	Integrin alpha-D	OID40317	ITGAD	1.9259	-0.1466	0.0786225
P20701	Integrin alpha-L	OID43877	ITGAL	0.7558	0.5194	0.530724
P11215	Integrin alpha-M	OID45165	ITGAM	0.3126	0.1823	0.858382
P06756	Integrin alpha-V	OID43878	ITGAV	-0.0248	0.1618	0.530724
P05556	Integrin beta-1	OID45377	ITGB1	0.2095	0.0312	0.956689
P05107	Integrin beta-2	OID45166	ITGB2	0.2732	0.1301	0.858651
Q13352	Centromere protein R	OID40318	ITGB3BP	0.2606	1.5661	0.0786992
P18084	Integrin beta-5	OID44724	ITGB5	-0.0392	0.1683	0.739315
P26010	Integrin beta-7	OID43880	ITGB7	-0.1285	0.0873	0.531096
O95965	Integrin beta-like protein 1	OID45167	ITGBL1	-0.2781	0.0519	0.858839
P19827	Inter-alpha-trypsin inhibitor heavy chain H1	OID45471	ITIH1	0.033	0.2229	0.988128
P07476	Involucrin	OID45168	IVL	0.136	0.0124	0.86049
Q8IYV9	Izumo sperm-egg fusion protein 1	OID41349	IZUMO1	2.3688	2.3198	0.188821
Q6IE81	Protein Jade-1	OID40321	JADE1	3.4457	2.41	0.0788425
P57087	Junctional adhesion molecule B	OID44725	JAM2	-0.0171	-0.0945	0.739315
Q9P266	Junctional cadherin 5-associated protein	OID40324	JCAD	0.122	-0.4624	0.0791955
O60229	Kalirin	OID40326	KALRN	-1.0832	3.2033	0.0804563
Q14678	KN motif and ankyrin repeat domain-containing protein 1	OID41353	KANK1	0.8702	-2.4923	0.188821
Q63ZY3	KN motif and ankyrin repeat domain-containing protein 2	OID42649	KANK2	0.06	0.0409	0.326167
Q9BW62	Katanin p60 ATPase-containing subunit A-like 1	OID41356	KATNAL1	1.2431	0.1345	0.188821
Q96I82	Kazal-type serine protease inhibitor domain-containing protein 1	OID43885	KAZALD1	-0.2196	0.1013	0.531104
Q8WVZ9	Kelch repeat and BTB domain-containing protein 7	OID41357	KBTBD7	0.2077	-1.7029	0.188821
Q03721	Potassium voltage-gated channel subfamily C member 4	OID42652	KCNC4	-0.0423	0.1644	0.32747
Q9Y2W7	Calsenilin	OID40329	KCNIP3	-0.536	1.3656	0.0810841
Q14654	ATP-sensitive inward rectifier potassium channel 11	OID40330	KCNJ11	-0.5993	1.184	0.0811276
Q8N5I3	Potassium channel regulatory protein	OID41361	KCNRG	-4.4276	4.2289	0.188821
Q14681	BTB/POZ domain-containing protein KCTD2	OID41364	KCTD2	-0.1852	-1.4553	0.189432
Q7Z5Y7	BTB/POZ domain-containing protein KCTD20	OID40331	KCTD20	3.91	-0.0776	0.0813433
Q9NXV2	BTB/POZ domain-containing protein KCTD5	OID43887	KCTD5	-0.4721	0.0011	0.531104
Q6ZWB6	BTB/POZ domain-containing protein KCTD8	OID41365	KCTD8	0.2289	-0.0989	0.18992
P35968	Vascular endothelial growth factor receptor 2	OID44727	KDR	0.0553	-0.0143	0.739486
P23276	Kell blood group glycoprotein	OID43888	KEL	0.0952	0.1913	0.531104
Q587J8	KH domain-containing protein 3	OID42656	KHDC3L	-1.3852	0.95	0.327702
P50053	Ketohexokinase	OID43889	KHK	-0.6924	-0.1348	0.531104
Q5VV43	Dyslexia-associated protein KIAA0319	OID43890	KIAA0319	0.19	0.0391	0.531104
Q6ZU52	Uncharacterized protein KIAA0408	OID41369	KIAA0408	-3.9417	-2.1902	0.18992
O60268	Uncharacterized protein KIAA0513	OID42658	KIAA0513	0.5186	-0.0484	0.327832
Q2KHM9	Protein moonraker	OID40335	KIAA0753	2.6453	1.9266	0.0817402
Q96AT1	Uncharacterized protein KIAA1143	OID42659	KIAA1143	0.6086	-0.1105	0.327833
Q86T90	Protein hinderin	OID42660	KIAA1328	0.1417	0.535	0.329557
Q5VZ46	Uncharacterized protein KIAA1614	OID40337	KIAA1614	1.9077	-0.2573	0.08217
Q9H1H9	Kinesin-like protein KIF13A	OID40340	KIF13A	0.5842	-0.1319	0.08217
Q9NQT8	Kinesin-like protein KIF13B	OID40341	KIF13B	-4.2097	4.2945	0.0821821
Q9NS87	Kinesin-like protein KIF15	OID41373	KIF15	3.1506	2.0707	0.18992
Q5T7B8	Kinesin-like protein KIF24	OID41377	KIF24	-2.2081	0.9198	0.18992
O95239	Chromosome-associated kinesin KIF4A	OID42667	KIF4A	0.0518	0.0117	0.329999
Q6ZMV9	Kinesin-like protein KIF6	OID40345	KIF6	0.2464	0.0452	0.0821821
Q9BW19	Kinesin-like protein KIFC1	OID42669	KIFC1	0.3415	-0.273	0.331257
O60870	DNA/RNA-binding protein KIN17	OID40347	KIN	0.1599	-0.5231	0.0832058
P43627_P43628	Killer cell immunoglobulin-like receptor 2DL2/2DL3	OID43894	KIR2DL2_KIR2DL3	-0.5181	0.3379	0.531104
P43629	Killer cell immunoglobulin-like receptor 3DL1	OID42672	KIR3DL1	0.0664	0.065	0.331257
P10721	Mast/stem cell growth factor receptor Kit	OID45379	KIT	0.1509	0.0889	0.956689
P21583	Kit ligand	OID44728	KITLG	-0.1797	-0.1176	0.739486
Q86Z14	Beta-klotho	OID43895	KLB	-0.2111	0.0446	0.531104
Q9UIH9	Krueppel-like factor 15	OID40350	KLF15	0.2859	-0.6042	0.0832058
Q8TBB5	Kelch domain-containing protein 4	OID41390	KLHDC4	0.0194	0.1593	0.18992
O60662	Kelch-like protein 41	OID42677	KLHL41	0.3128	-0.1192	0.331257
P06870	Kallikrein-1	OID44729	KLK1	-0.0894	0.0941	0.739543
O43240	Kallikrein-10	OID44730	KLK10	-0.0931	0.0479	0.73959
Q9UBX7	Kallikrein-11	OID44731	KLK11	-0.119	0.0521	0.739761
Q9P0G3	Kallikrein-14	OID43897	KLK14	-0.1197	0.0823	0.531104
Q9H2R5	Kallikrein-15	OID43898	KLK15	-0.2149	-0.0307	0.531104
Q9Y5K2	Kallikrein-4	OID43899	KLK4	-0.2521	-0.0461	0.531574
Q92876	Kallikrein-6	OID44732	KLK6	-0.1621	0.0454	0.739761
P49862	Kallikrein-7	OID44733	KLK7	-0.0958	0.0409	0.739761
O60259	Kallikrein-8	OID44734	KLK8	-0.1374	0.0877	0.739761
P03952	Plasma kallikrein	OID45473	KLKB1	0.024	0.1152	0.989069
Q107X0	Putative protein KRIP1	OID41393	KLKP1	-0.1256	-0.0674	0.190193
Q12918	Killer cell lectin-like receptor subfamily B member 1	OID43900	KLRB1	-0.1179	0.158	0.531668
Q13241	Natural killer cells antigen CD94	OID43901	KLRD1	-0.1812	0.076	0.532674
P26718	NKG2-D type II integral membrane protein	OID43902	KLRK1	-0.0839	0.0819	0.532674
Q4FZB7	Histone-lysine N-methyltransferase KMT5B	OID41396	KMT5B	2.9871	0.2724	0.190655
Q76NI1	Kinase non-catalytic C-lobe domain-containing protein 1	OID40353	KNDC1	-1.5153	-0.5182	0.0834756
Q9Y448	Small kinetochore-associated protein	OID40354	KNSTRN	-3.1871	-1.2252	0.0834756
A9QM74	Importin subunit alpha-8	OID40355	KPNA7	-3.004	2.6753	0.0834756
A5PL33	Protein KRBA1	OID40356	KRBA1	1.1307	-1.1579	0.0834756
Q8N9T8	Protein KRI1 homolog	OID40357	KRI1	-0.596	-1.306	0.0836056
Q13601	KRR1 small subunit processome component homolog	OID41397	KRR1	0.586	-0.3395	0.190655
Q04695	Keratin, type I cytoskeletal 17	OID42683	KRT17	-1.1664	1.7538	0.331776
P05783	Keratin, type I cytoskeletal 18	OID43903	KRT18	-0.0513	-0.0044	0.532674
P08727	Keratin, type I cytoskeletal 19	OID43904	KRT19	-0.0897	0.2404	0.533601
P35900	Keratin, type I cytoskeletal 20	OID40360	KRT20	-0.4215	0.526	0.0836699
P48668	Keratin, type II cytoskeletal 6C	OID43905	KRT6C	0.3581	-0.0254	0.533675
Q16773	Kynurenine--oxoglutarate transaminase 1	OID44735	KYAT1	0.1071	0.1416	0.739761
P32004	Neural cell adhesion molecule L1	OID44736	L1CAM	-0.0695	0.1351	0.739761
Q96EM0	Trans-3-hydroxy-L-proline dehydratase	OID44737	L3HYPDH	0.1249	0.1373	0.739911
Q969R5	Lethal(3)malignant brain tumor-like protein 2	OID41402	L3MBTL2	0.7242	-0.1146	0.190655
Q8NA19	Lethal(3)malignant brain tumor-like protein 4	OID40361	L3MBTL4	-4.0747	-0.2362	0.0836699
Q9GZZ8	Extracellular glycoprotein lacritin	OID43907	LACRT	0.3844	-0.0921	0.533675
P18627	Lymphocyte activation gene 3 protein	OID43908	LAG3	-0.2402	0.0196	0.536347
Q6GTX8	Leukocyte-associated immunoglobulin-like receptor 1	OID44739	LAIR1	0.2791	0.2467	0.739911
Q6ISS4	Leukocyte-associated immunoglobulin-like receptor 2	OID43909	LAIR2	-0.1142	0.2293	0.536706
Q16363	Laminin subunit alpha-4	OID44740	LAMA4	-0.0765	0.0751	0.742601
P07942	Laminin subunit beta-1	OID43910	LAMB1	0.5686	-0.0486	0.536706
P55268	Laminin subunit beta-2	OID45171	LAMB2	-0.176	0.1332	0.861329
P13473	Lysosome-associated membrane glycoprotein 2	OID44741	LAMP2	-0.008	0.0641	0.743508
Q9UQV4	Lysosome-associated membrane glycoprotein 3	OID43911	LAMP3	-0.1201	0.2563	0.536706
O43504	Ragulator complex protein LAMTOR5	OID43912	LAMTOR5	0.8638	0.4914	0.537082
Q6PKG0	La-related protein 1	OID43913	LARP1	0.0582	-0.08	0.537222
Q659C4	La-related protein 1B	OID41404	LARP1B	0.7128	-0.4269	0.190879
Q71RC2	La-related protein 4	OID41405	LARP4	2.7124	1.9642	0.190879
Q9Y4W2	Ribosomal biogenesis protein LAS1L	OID41406	LAS1L	0.3012	0.8211	0.191454
O43561	Linker for activation of T-cells family member 1	OID43914	LAT	0.1824	-0.251	0.538201
Q9GZY6	Linker for activation of T-cells family member 2	OID43915	LAT2	-0.2423	-0.5414	0.538474
O95835	Serine/threonine-protein kinase LATS1	OID43916	LATS1	-0.006	-0.3644	0.538474
Q6UX15	Layilin	OID43917	LAYN	-0.1652	-0.0332	0.538904
P18428	Lipopolysaccharide-binding protein	OID45380	LBP	0.0087	-0.1399	0.956689
Q14739	Delta(14)-sterol reductase LBR	OID44742	LBR	0.6781	0.1937	0.743508
O95447	Lebercilin-like protein	OID41408	LCA5L	0.0209	0.0225	0.191454
P04180	Phosphatidylcholine-sterol acyltransferase	OID45381	LCAT	0.1478	0.1635	0.956689
P06239	Tyrosine-protein kinase Lck	OID41409	LCK	0.6487	-0.6327	0.191454
P80188	Neutrophil gelatinase-associated lipocalin	OID45382	LCN2	0.6688	-0.0001	0.956873
P13796	Plastin-2	OID45173	LCP1	0.6083	0.0012	0.862234
Q13094	Lymphocyte cytosolic protein 2	OID44743	LCP2	0.406	-0.4287	0.743508
Q6UWM7	Lactase-like protein	OID40362	LCTL	0.3459	3.5618	0.0850074
O75112	LIM domain-binding protein 3	OID40363	LDB3	0.1127	0.0727	0.0857076
P01130	Low-density lipoprotein receptor	OID45174	LDLR	-0.1062	0.0083	0.862757
O14960	Leukocyte cell-derived chemotaxin-2	OID44744	LECT2	-0.0377	-0.0288	0.744547
O00292	Left-right determination factor 2	OID43920	LEFTY2	0.2902	-0.0217	0.539332
Q6P5S2	Protein LEG1 homolog	OID44745	LEG1	0.0425	0.0258	0.744699
Q96BZ8	Leukocyte receptor cluster member 1	OID41410	LENG1	-0.4348	-0.6682	0.191454
Q96PV6	Leukocyte receptor cluster member 8	OID41411	LENG8	-0.011	-0.0559	0.193662
P41159	Leptin	OID44746	LEP	0.2828	-0.2145	0.745402
P48357	Leptin receptor	OID44747	LEPR	-0.0454	0.0764	0.745874
P09382	Galectin-1	OID44748	LGALS1	0.2489	0.1858	0.74751
P17931	Galectin-3	OID45175	LGALS3	0.1894	-0.1708	0.863071
Q08380	Galectin-3-binding protein	OID45474	LGALS3BP	-0.0356	0.0907	0.989069
P56470	Galectin-4	OID44749	LGALS4	-0.18	-0.0432	0.74751
P47929	Galectin-7	OID43922	LGALS7	-0.5367	-0.1451	0.539596
O00214	Galectin-8	OID44750	LGALS8	0.7849	0.1735	0.74751
O00182	Galectin-9	OID44751	LGALS9	-0.0309	0.0414	0.748173
Q99538	Legumain	OID44752	LGMN	-0.3377	0.0565	0.748173
P01229	Lutropin subunit beta	OID42693	LHB	0.1394	-0.0983	0.332204
Q9H008	Phospholysine phosphohistidine inorganic pyrophosphate phosphatase	OID44753	LHPP	0.6093	0.1957	0.749055
P50458	LIM/homeobox protein Lhx2	OID40364	LHX2	-1.0103	0.4103	0.0857076
P42702	Leukemia inhibitory factor receptor	OID43923	LIFR	0.0499	0.1088	0.53978
Q8N149	Leukocyte immunoglobulin-like receptor subfamily A member 2	OID45176	LILRA2	-0.1929	0.051	0.863416
Q8N6C8	Leukocyte immunoglobulin-like receptor subfamily A member 3	OID45177	LILRA3	0.3369	-0.0949	0.863965
P59901	Leukocyte immunoglobulin-like receptor subfamily A member 4	OID42696	LILRA4	-0.3688	0.2627	0.332262
A6NI73	Leukocyte immunoglobulin-like receptor subfamily A member 5	OID44754	LILRA5	0.1344	0.0316	0.749093
Q8NHJ6	Leukocyte immunoglobulin-like receptor subfamily B member 4	OID42697	LILRB4	-0.5211	0.0488	0.332554
O75023	Leukocyte immunoglobulin-like receptor subfamily B member 5	OID45178	LILRB5	-0.2123	0.1855	0.864303
Q9UGP4	LIM domain-containing protein 1	OID41413	LIMD1	0.1153	-0.3839	0.193662
Q5TKA1	Protein lin-9 homolog	OID40366	LIN9	-3.0778	0.1176	0.0857076
Q8N7U9	Putative uncharacterized protein encoded by LINC00469	OID40367	LINC00469	-3.8904	-3.1823	0.0857076
Q8N535	Putative uncharacterized protein encoded by LINC00471	OID40368	LINC00471	0.5035	-0.3879	0.0857076
P07098	Gastric triacylglycerol lipase	OID43924	LIPF	-0.1252	0.2564	0.540614
P20700	Lamin-B1	OID43925	LMNB1	0.4205	-0.5129	0.540885
Q03252	Lamin-B2	OID43926	LMNB2	0.1467	0.321	0.540885
P29536	Leiomodin-1	OID43927	LMOD1	-0.4647	-0.2377	0.540885
Q1L5Z9	LON peptidase N-terminal domain and RING finger protein 2	OID40371	LONRF2	3.5909	2.6348	0.0857076
P06858	Lipoprotein lipase	OID44756	LPL	-0.3939	-0.0945	0.749093
P22079	Lactoperoxidase	OID43931	LPO	0.0036	-0.1361	0.540885
Q9Y2L9	Leucine-rich repeat and calponin homology domain-containing protein 1	OID41420	LRCH1	0.3196	0.1436	0.193662
O75427	Leucine-rich repeat and calponin homology domain-containing protein 4	OID43933	LRCH4	0.1504	-0.2987	0.541026
P02750	Leucine-rich alpha-2-glycoprotein	OID45476	LRG1	0.0637	0.0223	0.989069
Q96JA1	Leucine-rich repeats and immunoglobulin-like domains protein 1	OID43934	LRIG1	-0.1684	0.0583	0.541026
Q07954	Prolow-density lipoprotein receptor-related protein 1	OID43935	LRP1	0.3907	0.0222	0.542462
Q86VZ4	Low-density lipoprotein receptor-related protein 11	OID44757	LRP11	-0.0852	-0.0217	0.749594
P30533	Alpha-2-macroglobulin receptor-associated protein	OID44758	LRPAP1	-0.0329	0.1712	0.750391
Q9BTT6	Leucine-rich repeat-containing protein 1	OID40374	LRRC1	1.8397	0.209	0.0857665
Q1X8D7	Leucine-rich repeat-containing protein 36	OID41423	LRRC36	-1.0169	-0.2578	0.193662
A6NM11	Leucine-rich repeat-containing protein 37A2	OID43937	LRRC37A2	0.1873	0.1332	0.542858
Q9HBW1	Leucine-rich repeat-containing protein 4	OID41424	LRRC4	0.6969	-0.0949	0.19393
Q9Y546	Leucine-rich repeat-containing protein 42	OID41425	LRRC42	-0.0824	-0.0237	0.193973
Q8IUZ0	Leucine-rich repeat-containing protein 49	OID41426	LRRC49	-0.1668	-2.6085	0.193973
Q8NAA5	Leucine-rich repeat-containing protein 75A	OID40377	LRRC75A	-0.3079	0.4416	0.0862605
Q6UXK5	Leucine-rich repeat neuronal protein 1	OID42708	LRRN1	-0.0323	0.0554	0.333382
Q86VH4	Leucine-rich repeat transmembrane neuronal protein 4	OID41430	LRRTM4	0.7371	0.0632	0.194225
Q8N967	Leucine-rich repeat and transmembrane domain-containing protein 2	OID43938	LRTM2	0.3064	-0.1877	0.542858
P33241	Lymphocyte-specific protein 1	OID43939	LSP1	0.2783	-0.2142	0.545538
Q14767	Latent-transforming growth factor beta-binding protein 2	OID45179	LTBP2	-0.2099	-0.0208	0.864536
Q9NS15	Latent-transforming growth factor beta-binding protein 3	OID42713	LTBP3	-0.8536	-0.0295	0.333382
P36941	Tumor necrosis factor receptor superfamily member 3	OID44760	LTBR	0.0737	0.164	0.750391
P02788	Lactotransferrin	OID45180	LTF	0.2841	-0.1229	0.864791
P29376	Leukocyte tyrosine kinase receptor	OID41432	LTK	0.257	0.2177	0.194225
Q96GA3	Protein LTV1 homolog	OID41433	LTV1	-2.1394	1.8018	0.194868
Q9NQ29	Putative RNA-binding protein Luc7-like 1	OID42715	LUC7L	0.3016	0.1546	0.333422
O95232	Luc7-like protein 3	OID42716	LUC7L3	0.557	0.1386	0.333422
P51884	Lumican	OID45477	LUM	0.0061	0.2847	0.989069
Q86TE4	Leucine zipper protein 2	OID43943	LUZP2	-0.5009	-0.0927	0.545538
Q6Q4G3	Aminopeptidase Q	OID40379	LVRN	-0.1409	0.1779	0.0862605
Q9BS40	Latexin	OID43944	LXN	0.1103	0.1661	0.545538
Q14210	Lymphocyte antigen 6D	OID44761	LY6D	-0.1611	0.0114	0.750402
O60449	Lymphocyte antigen 75	OID43945	LY75	0.1928	0.1968	0.546505
Q9HBG7	T-lymphocyte surface antigen Ly-9	OID43946	LY9	-0.0769	0.0644	0.546505
Q86SG7	Lysozyme g-like protein 2	OID41435	LYG2	-0.2086	0.1024	0.195167
Q8N2G4	Ly6/PLAUR domain-containing protein 1	OID42718	LYPD1	0.0142	0.0972	0.334115
O95274	Ly6/PLAUR domain-containing protein 3	OID44762	LYPD3	-0.023	0.0617	0.750631
Q6UX82	Ly6/PLAUR domain-containing protein 8	OID42719	LYPD8	-0.6516	0.205	0.334115
Q9Y5Y7	Lymphatic vessel endothelial hyaluronic acid receptor 1	OID45478	LYVE1	-0.0003	0.3199	0.989069
Q7Z4W2	Lysozyme-like protein 2	OID42722	LYZL2	0.3008	-0.1675	0.334207
Q9Y250	Leucine zipper putative tumor suppressor 1	OID43949	LZTS1	0.1699	0.0702	0.547512
P20645	Cation-dependent mannose-6-phosphate receptor	OID43950	M6PR	0.0352	-0.0842	0.547672
Q9UPN3	Microtubule-actin cross-linking factor 1, isoforms 1/2/3/4/5	OID42723	MACF1	-0.1647	0.0272	0.334809
Q9Y6D9	Mitotic spindle assembly checkpoint protein MAD1	OID43951	MAD1L1	0.8107	0.2018	0.547672
Q7L5Y9	E3 ubiquitin-protein transferase MAEA	OID42724	MAEA	0.1606	0.0369	0.337417
P20916	Myelin-associated glycoprotein	OID43952	MAG	-0.2592	0.1922	0.547771
P43358	Melanoma-associated antigen 4	OID41442	MAGEA4	0.2147	-3.4819	0.195167
P43362	Melanoma-associated antigen 9	OID41443	MAGEA9	4.629	-1.2083	0.195167
O15480	Melanoma-associated antigen B3	OID40385	MAGEB3	1.2866	-0.061	0.0865664
Q9UBF1	Melanoma-associated antigen C2	OID42727	MAGEC2	-0.3021	-0.3161	0.337628
Q96JG8	Melanoma-associated antigen D4	OID40387	MAGED4	0.8071	-2.8968	0.087298
P20794	Serine/threonine-protein kinase MAK	OID40388	MAK	0.1295	-0.0511	0.0875175
O60476	Mannosyl-oligosaccharide 1,2-alpha-mannosidase IB	OID43954	MAN1A2	-0.0685	-0.0756	0.547771
Q9Y2E5	Epididymis-specific alpha-mannosidase	OID44765	MAN2B2	0.0221	0.1	0.750631
Q9H8J5	MANSC domain-containing protein 1	OID44767	MANSC1	0.016	0.0087	0.750631
A6NCE7	Microtubule-associated proteins 1A/1B light chain 3 beta 2	OID42733	MAP1LC3B2	-0.3884	-0.0802	0.338625
Q02750	Dual specificity mitogen-activated protein kinase kinase 1	OID44768	MAP2K1	0.8847	-0.043	0.750978
Q99759	Mitogen-activated protein kinase kinase kinase 3	OID40390	MAP3K3	0.6179	-0.7065	0.0876624
Q9Y6R4	Mitogen-activated protein kinase kinase kinase 4	OID40391	MAP3K4	0.4693	1.4726	0.0876624
Q92918	Mitogen-activated protein kinase kinase kinase kinase 1	OID41447	MAP4K1	1.9118	-0.454	0.196583
Q9Y4K4	Mitogen-activated protein kinase kinase kinase kinase 5	OID43958	MAP4K5	0.6655	-0.3404	0.548379
Q9UPT6	C-Jun-amino-terminal kinase-interacting protein 3	OID41450	MAPK8IP3	2.5303	-1.3262	0.196815
P45984	Mitogen-activated protein kinase 9	OID43959	MAPK9	0.1095	0.3166	0.548503
Q8N8E1	Putative uncharacterized protein encoded by MAPKAPK5-AS1	OID40396	MAPKAPK5-AS1	-0.0126	0.0259	0.0876624
Q9UEW3	Macrophage receptor MARCO	OID44769	MARCO	-0.1475	0.0645	0.750978
P56192	Methionine--tRNA ligase, cytoplasmic	OID44431	MARS1	0.511	0.2041	0.662524
O00339	Matrilin-2	OID44770	MATN2	-0.0438	-0.06	0.751251
O15232	Matrilin-3	OID43961	MATN3	-0.2454	0.0762	0.548503
P11226	Mannose-binding protein C	OID45479	MBL2	0.1505	-0.0644	0.989132
A4D2B0	Metallo-beta-lactamase domain-containing protein 1	OID40399	MBLAC1	5.6645	-3.3616	0.0876624
P43121	Cell surface glycoprotein MUC18	OID45383	MCAM	0.0222	-0.0043	0.958659
Q8IVS2	Malonyl-CoA-acyl carrier protein transacylase, mitochondrial	OID41458	MCAT	-1.2658	2.3187	0.197244
Q96RQ3	Methylcrotonoyl-CoA carboxylase subunit alpha, mitochondrial	OID40400	MCCC1	-2.7265	0.4597	0.0876624
Q86YR7	Probable guanine nucleotide exchange factor MCF2L2	OID40401	MCF2L2	-3.9904	4.2697	0.0876624
Q8NI22	Multiple coagulation factor deficiency protein 2	OID44771	MCFD2	-0.0635	-0.3165	0.751423
Q8NFP4	MAM domain-containing glycosylphosphatidylinositol anchor protein 1	OID43966	MDGA1	0.0019	0.3444	0.54856
Q9BV79	Enoyl-[acyl-carrier-protein] reductase, mitochondrial	OID43967	MECR	0.533	0.5109	0.54856
Q93074	Mediator of RNA polymerase II transcription subunit 12	OID40404	MED12	-0.4587	0.3089	0.0877616
Q06413	Myocyte-specific enhancer factor 2C	OID41463	MEF2C	-0.0503	-0.1887	0.197676
O15553	Pyrin	OID41464	MEFV	-0.0475	-0.2995	0.198287
Q96KG7	Multiple epidermal growth factor-like domains protein 10	OID44773	MEGF10	0.0945	0.0245	0.752896
A6BM72	Multiple epidermal growth factor-like domains protein 11	OID42750	MEGF11	-0.2289	0.6562	0.338634
Q9H1U4	Multiple epidermal growth factor-like domains protein 9	OID45181	MEGF9	-0.1048	0.1044	0.867533
Q99687	Homeobox protein Meis3	OID42751	MEIS3	3.8967	0.8186	0.339246
P08582	Melanotransferrin	OID44774	MELTF	-0.0754	0.0822	0.753407
Q9BUN1	Protein MENT	OID44775	MENT	0.0662	-0.0198	0.753407
Q16819	Meprin A subunit alpha	OID43968	MEP1A	-0.3571	0.0395	0.549609
Q9NQ76	Matrix extracellular phosphoglycoprotein	OID44777	MEPE	0.0102	-0.2264	0.753407
Q12866	Tyrosine-protein kinase Mer	OID44778	MERTK	0.782	-0.2736	0.754197
P08581	Hepatocyte growth factor receptor	OID45183	MET	-0.1387	-0.0016	0.867533
Q6UB28	Methionine aminopeptidase 1D, mitochondrial	OID43969	METAP1D	0.4475	0.3565	0.549761
P50579	Methionine aminopeptidase 2	OID43970	METAP2	0.547	0.0616	0.551165
P0C7V9	Putative methyltransferase-like protein 15P1	OID40406	METTL15P1	-0.5251	0.0403	0.0878148
Q86W50	RNA N6-adenosine-methyltransferase METTL16	OID40407	METTL16	2.1766	-1.999	0.0878148
Q8N6Q8	Probable methyltransferase-like protein 25	OID40408	METTL25	0.6611	-0.4655	0.0891064
Q8TCB7	tRNA N(3)-methylcytidine methyltransferase METTL6	OID41467	METTL6	0.168	-0.0717	0.199076
Q6ZN04	RNA-binding protein MEX3B	OID41468	MEX3B	1.8032	-0.2227	0.19944
P55082	Microfibril-associated glycoprotein 3	OID41470	MFAP3	0.1143	0.1575	0.199558
O75121	Microfibrillar-associated protein 3-like	OID42755	MFAP3L	0.8475	-0.0738	0.339246
Q13361	Microfibrillar-associated protein 5	OID45184	MFAP5	-0.1415	-0.0873	0.868012
Q08431	Lactadherin	OID45185	MFGE8	-0.4111	-0.0911	0.868012
Q10469	Alpha-1,6-mannosyl-glycoprotein 2-beta-N-acetylglucosaminyltransferase	OID44780	MGAT2	0.171	0.1143	0.754197
Q16674	Melanoma-derived growth regulatory protein	OID44782	MIA	-0.1398	-0.052	0.754645
Q29980_Q29983	MHC class I polypeptide-related sequence A_MHC class I polypeptide-related sequence B	OID43972	MICA_MICB	0.1156	-0.1124	0.551165
Q8TDZ2	[F-actin]-monooxygenase MICAL1	OID41474	MICAL1	-0.3974	-0.0976	0.199558
Q8IY33	MICAL-like protein 2	OID42757	MICALL2	0.7764	-0.1217	0.339246
Q504T8	Midnolin	OID41476	MIDN	-0.3282	-0.1174	0.199558
P14174	Macrophage migration inhibitory factor	OID45186	MIF	1.5163	0.2585	0.868012
Q7Z6M3	Allergin-1	OID42758	MILR1	-0.1539	0.1389	0.339246
Q4G0A6	Probable ubiquitin carboxyl-terminal hydrolase MINDY-4	OID40410	MINDY4	-0.2918	-2.3386	0.0891064
A8MYZ0	Inactive ubiquitin carboxyl-terminal hydrolase MINDY-4B	OID40411	MINDY4B	2.2553	-2.0777	0.0891815
Q8N4C8	Misshapen-like kinase 1	OID43975	MINK1	0.0781	-0.1367	0.551165
Q9UGB7	Inositol oxygenase	OID41477	MIOX	-1.3284	0.9835	0.199558
Q8IVT2	Mitotic interactor and substrate of PLK1	OID41479	MISP	0.1481	0.0554	0.199767
Q8WV92	MIT domain-containing protein 1	OID43976	MITD1	0.5509	0.1597	0.551183
Q9BUB5	MAP kinase-interacting serine/threonine-protein kinase 1	OID43977	MKNK1	0.0483	-0.0221	0.5515
Q16655	Melanoma antigen recognized by T-cells 1	OID41481	MLANA	-3.0736	-1.3096	0.2004
Q5VWP3	Muscular LMNA-interacting protein	OID41483	MLIP	-0.4397	0.1777	0.200456
Q96EY8	Corrinoid adenosyltransferase MMAB	OID42762	MMAB	-0.4492	0.272	0.339246
P08473	Neprilysin	OID43979	MME	0.0317	0.0088	0.5515
Q495T6	Membrane metallo-endopeptidase-like 1	OID40414	MMEL1	-0.2024	0.6226	0.0895365
P03956	Interstitial collagenase	OID44783	MMP1	-0.1368	0.0133	0.754694
P09238	Stromelysin-2	OID44784	MMP10	-0.1194	0.0216	0.754887
P45452	Collagenase 3	OID42763	MMP13	0.0245	-0.151	0.339246
P08254	Stromelysin-1	OID45187	MMP3	-0.0481	-0.0749	0.868012
P09237	Matrilysin	OID44786	MMP7	-0.0177	-0.0223	0.755362
P14780	Matrix metalloproteinase-9	OID45188	MMP9	0.1539	-0.0611	0.868306
Q9H8L6	Multimerin-2	OID44788	MMRN2	-0.0826	-0.1308	0.756021
P22033	Methylmalonyl-CoA mutase, mitochondrial	OID42764	MMUT	-0.179	-0.2973	0.339246
Q10571	Transcriptional activator MN1	OID42765	MN1	-1.6539	-3.7202	0.339296
Q9BWT6	Meiotic nuclear division protein 1 homolog	OID40415	MND1	0.2493	1.0873	0.0901114
P41218	Myeloid cell nuclear differentiation antigen	OID44789	MNDA	0.168	-0.5758	0.756021
Q16653	Myelin-oligodendrocyte glycoprotein	OID43981	MOG	-0.0914	0.1011	0.5515
Q9Y6X9	ATPase MORC2	OID40417	MORC2	-0.3081	0.508	0.0908433
Q14149	MORC family CW-type zinc finger protein 3	OID43982	MORC3	0.4534	0.0735	0.551542
Q8NDC4	MORN repeat-containing protein 4	OID42769	MORN4	-0.2732	-0.0186	0.340092
Q5VZ52	MORN repeat-containing protein 5	OID40418	MORN5	0.3556	-0.0521	0.0910662
Q9UJG1	Motile sperm domain-containing protein 1	OID40419	MOSPD1	0.3459	3.3043	0.0914443
Q99549	M-phase phosphoprotein 8	OID43983	MPHOSPH8	0.4376	-0.0277	0.551863
Q5T2T1	MAGUK p55 subfamily member 7	OID43985	MPP7	0.2196	-0.0085	0.551957
B2RBV5	Putative MORF4 family-associated protein 1-like protein UPP	OID41514	MR1L2	-0.9004	0.0349	0.200692
Q8TCY5	Melanocortin-2 receptor accessory protein	OID42772	MRAP	-0.8646	0.5197	0.340825
Q96G30	Melanocortin-2 receptor accessory protein 2	OID40421	MRAP2	-0.491	0.887	0.0920549
P22897	Macrophage mannose receptor 1	OID45385	MRC1	-0.0266	0.2125	0.958851
Q8N565	Melanoregulin	OID40422	MREG	-0.7953	0.2763	0.0922987
Q9BV20	Methylthioribose-1-phosphate isomerase	OID42773	MRI1	0.3011	0.0444	0.342356
Q6IN84	rRNA methyltransferase 1, mitochondrial	OID40423	MRM1	-1.5671	0.9648	0.0927905
A6NES4	Maestro heat-like repeat-containing protein family member 2A	OID40424	MROH2A	1.1438	-1.1034	0.0931843
Q92552	28S ribosomal protein S27, mitochondrial	OID41489	MRPS27	0.4703	1.0808	0.200456
Q96E11	Ribosome-recycling factor, mitochondrial	OID42778	MRRF	0.2581	0.0585	0.343197
Q969V6	Myocardin-related transcription factor A	OID42779	MRTFA	0.9288	0.0678	0.343197
P11836	B-lymphocyte antigen CD20	OID43990	MS4A1	0.1886	-0.1203	0.552585
P08118	Beta-microseminoprotein	OID45190	MSMB	0.2229	0.157	0.871431
Q1L6U9	Prostate-associated microseminoprotein	OID44792	MSMP	-0.0645	-0.0337	0.756021
P21757	Macrophage scavenger receptor types I and II	OID44793	MSR1	-0.1382	0.0528	0.756021
Q9UJ68	Mitochondrial peptide methionine sulfoxide reductase	OID44794	MSRA	1.1351	0.1917	0.756021
P26927	Hepatocyte growth factor-like protein	OID45386	MST1	-0.1329	-0.0173	0.959227
O14793	Growth/differentiation factor 8	OID43992	MSTN	-0.2276	-0.1068	0.552665
Q96E29	Transcription termination factor 3, mitochondrial	OID41496	MTERF3	0.6988	-0.552	0.200456
P46199	Translation initiation factor IF-2, mitochondrial	OID40428	MTIF2	1.8163	-0.1051	0.0950285
P58546	Myotrophin	OID43996	MTPN	0.7246	0.4568	0.552665
Q9P0P8	Mitochondrial transcription rescue factor 1	OID41501	MTRES1	0.1133	0.5711	0.200456
Q765P7	Protein MTSS 2	OID43998	MTSS2	0.2215	0.0546	0.552665
P15941	Mucin-1	OID45191	MUC1	0.0927	0.1059	0.871431
Q8WXI7	Mucin-16	OID43999	MUC16	0.1364	0.257	0.552665
Q02817	Mucin-2	OID45192	MUC2	0.1254	0.1605	0.871431
Q8N307	Mucin-20	OID42787	MUC20	-0.4609	0.4298	0.344363
Q02505	Mucin-3A	OID40429	MUC3A	-3.7594	-0.2625	0.0950285
Q8TAX7	Mucin-7	OID40430	MUC7	-3.84	3.0657	0.0960537
Q03426	Mevalonate kinase	OID42789	MVK	-0.0198	-0.1215	0.344482
Q00872	Myosin-binding protein C, slow-type	OID44796	MYBPC1	-0.224	-0.1531	0.756021
Q14324	Myosin-binding protein C, fast-type	OID44000	MYBPC2	-0.1756	-0.0185	0.552665
Q13203	Myosin-binding protein H	OID41502	MYBPH	-0.9617	-0.1439	0.200456
O75592	E3 ubiquitin-protein ligase MYCBP2	OID44001	MYCBP2	0.23	-0.2039	0.55371
Q8TBZ2	MYCBP-associated protein	OID40432	MYCBPAP	1.0193	0.441	0.0960537
P12882	Myosin-1	OID41503	MYH1	-0.0334	-0.0111	0.200456
P35580	Myosin-10	OID41504	MYH10	0.8001	0.1167	0.200456
Q9UKX3	Myosin-13	OID40433	MYH13	0.6788	-0.4227	0.0960537
P12883	Myosin-7	OID41505	MYH7	-1.4953	0.5639	0.200692
P35579	Myosin-9	OID45193	MYH9	0.097	-0.2626	0.871629
Q9BUA6	Myosin regulatory light chain 10	OID40435	MYL10	-0.7568	-3.8095	0.0960537
P08590	Myosin light chain 3	OID42794	MYL3	0.1672	-0.1071	0.344711
P12829	Myosin light chain 4	OID44002	MYL4	0.2858	0.1603	0.55393
P14649	Myosin light chain 6B	OID42795	MYL6B	2.1984	3.5622	0.344908
Q8IUG5	Unconventional myosin-XVIIIb	OID41507	MYO18B	-0.2629	0.1226	0.200692
Q12965	Unconventional myosin-Ie	OID41508	MYO1E	0.6757	0.312	0.200692
Q9UM54	Unconventional myosin-VI	OID42796	MYO6	-0.9362	0.0052	0.345
Q13459	Unconventional myosin-IXb	OID42797	MYO9B	0.5508	-0.0899	0.345392
Q99972	Myocilin	OID45194	MYOC	0.085	0.0391	0.872333
Q5VTT5	Myomesin-3	OID44798	MYOM3	-0.1002	0.0314	0.756021
Q9UL68	Myelin transcription factor 1-like protein	OID40439	MYT1L	2.349	-2.0307	0.0960537
Q8WU39	Marginal zone B- and B1-cell-specific protein	OID44799	MZB1	0.1733	0.1388	0.756222
Q86UW6	NEDD4-binding protein 2	OID41519	N4BP2	0.3078	-0.1862	0.200692
Q02083	N-acylethanolamine-hydrolyzing acid amidase	OID44004	NAAA	0.2837	0.3395	0.554378
Q9H009	Nascent polypeptide-associated complex subunit alpha-2	OID40442	NACA2	0.2211	-0.1773	0.0960537
Q96RE7	Nucleus accumbens-associated protein 1	OID44005	NACC1	-0.1318	0.0691	0.554835
O95544	NAD kinase	OID44800	NADK	0.106	-0.2465	0.756417
P17050	Alpha-N-acetylgalactosaminidase	OID44006	NAGA	-0.0151	-0.0717	0.555004
Q9UJ70	N-acetyl-D-glucosamine kinase	OID44007	NAGK	0.2845	0.1656	0.555004
Q9UK23	N-acetylglucosamine-1-phosphodiester alpha-N-acetylglucosaminidase	OID44801	NAGPA	-0.0743	0.0359	0.756638
Q9H9S0	Homeobox protein NANOG	OID40443	NANOG	-1.5927	0.3545	0.0960537
Q9NR45	Sialic acid synthase	OID44008	NANS	0.5231	0.0333	0.555004
Q99733	Nucleosome assembly protein 1-like 4	OID44009	NAP1L4	0.1073	-0.0396	0.555004
Q6XQN6	Nicotinate phosphoribosyltransferase	OID44010	NAPRT	0.7603	0.0551	0.555634
O43776	Asparagine--tRNA ligase, cytoplasmic	OID44011	NARS1	0.3583	0.0912	0.555714
Q8IVL1	Neuron navigator 2	OID41523	NAV2	0.0513	-0.2046	0.201138
P41271	Neuroblastoma suppressor of tumorigenicity 1	OID44802	NBL1	0.1159	-0.0118	0.756652
O60934	Nibrin	OID42808	NBN	0.0345	-0.5054	0.345445
Q86T75	Neuroblastoma breakpoint family member 11	OID41525	NBPF11	1.2884	-0.2169	0.201234
P13591	Neural cell adhesion molecule 1	OID45387	NCAM1	-0.0197	0.023	0.959886
O15394	Neural cell adhesion molecule 2	OID45195	NCAM2	0.0513	-0.0781	0.872446
O14594	Neurocan core protein	OID44803	NCAN	-0.1299	0.0101	0.756652
Q9BPX3	Condensin complex subunit 3	OID42809	NCAPG	0.0514	-0.1474	0.345445
Q6ZVX7	F-box only protein 50	OID42810	NCCRP1	-0.0082	0.492	0.345459
A8MVU1_P14598	Neutrophil cytosol factor 1/1C	OID41527	NCF1C_NCF1	0.1531	-0.6893	0.202114
P19878	Neutrophil cytosol factor 2	OID44013	NCF2	0.1532	-0.146	0.555714
O43639	Cytoplasmic protein NCK2	OID44804	NCK2	0.1581	0.0448	0.756846
O14513	Nck-associated protein 5	OID40447	NCKAP5	0.3459	-0.1684	0.0969035
Q15788	Nuclear receptor coactivator 1	OID41529	NCOA1	0.345	-0.2484	0.202384
Q9H4R4	Putative nuclear receptor corepressor 1-like protein NCOR1P1	OID40448	NCOR1P1	-3.5081	-0.4461	0.0975374
O76036	Natural cytotoxicity triggering receptor 1	OID44014	NCR1	-0.0618	0.2637	0.555943
Q68D85	Natural cytotoxicity triggering receptor 3 ligand 1	OID44015	NCR3LG1	0.0792	-0.1048	0.555943
P62166	Neuronal calcium sensor 1	OID44016	NCS1	-0.0672	0.0797	0.5564
Q92597	Protein NDRG1	OID41533	NDRG1	0.8237	-0.0262	0.202384
Q9Y375	Complex I intermediate-associated protein 30, mitochondrial	OID40450	NDUFAF1	0.3459	-0.1684	0.0975374
P17568	NADH dehydrogenase [ubiquinone] 1 beta subcomplex subunit 7	OID44019	NDUFB7	0.131	0.0596	0.556646
O75380	NADH dehydrogenase [ubiquinone] iron-sulfur protein 6, mitochondrial	OID42816	NDUFS6	-0.0361	-0.376	0.346287
P20929	Nebulin	OID42817	NEB	-0.9716	0.4536	0.346287
Q7Z6G3	N-terminal EF-hand calcium-binding protein 2	OID42819	NECAB2	0.0689	0.0426	0.347596
Q96P71	N-terminal EF-hand calcium-binding protein 3	OID40453	NECAB3	0.2908	-2.0522	0.0975374
Q9NVZ3	Adaptin ear-binding coat-associated protein 2	OID42820	NECAP2	1.9664	-0.0641	0.34821
Q92692	Nectin-2	OID44805	NECTIN2	0.4481	0.1679	0.756846
Q96NY8	Nectin-4	OID44806	NECTIN4	-0.2864	0.1506	0.757638
Q8NHV4	Protein NEDD1	OID42821	NEDD1	0.7458	0.1486	0.34821
Q96PU5	E3 ubiquitin-protein ligase NEDD4-like	OID44021	NEDD4L	0.0402	-0.0674	0.556646
Q14511	Enhancer of filamentation 1	OID44022	NEDD9	-0.3593	-0.0032	0.556646
P07196	Neurofilament light polypeptide	OID42822	NEFL	0.4885	0.1449	0.34886
Q8TDX7	Serine/threonine-protein kinase Nek7	OID42824	NEK7	0.8609	-0.2257	0.34886
Q92832	Protein kinase C-binding protein NELL1	OID44807	NELL1	-0.0262	-0.1086	0.757725
Q99435	Protein kinase C-binding protein NELL2	OID44808	NELL2	-0.0308	0.0166	0.758263
Q92859	Neogenin	OID44023	NEO1	-0.0607	-0.0195	0.556646
Q7Z628	Neuroepithelial cell-transforming gene 1 protein	OID40455	NET1	0.2454	-1.5397	0.097604
Q8NC67	Neuropilin and tolloid-like protein 2	OID40456	NETO2	-2.8663	2.4819	0.0979955
Q8NBZ9	Putative uncharacterized protein NEXN-AS1	OID41542	NEXN-AS1	-1.2544	2.7469	0.202549
O94856	Neurofascin	OID44024	NFASC	-0.229	0.0427	0.557279
Q16621	Transcription factor NF-E2 45 kDa subunit	OID44027	NFE2	0.6279	0.0842	0.557295
P19838	Nuclear factor NF-kappa-B p105 subunit	OID42828	NFKB1	-0.0377	-0.1891	0.348871
Q9UMS0	NFU1 iron-sulfur cluster scaffold homolog, mitochondrial	OID44028	NFU1	0.0767	0.6387	0.55824
Q12986	Transcriptional repressor NF-X1	OID42831	NFX1	-0.0444	-0.2318	0.348871
Q8NEJ9	Neuroguidin	OID41544	NGDN	0.7019	-0.0954	0.203304
Q9H9Q4	Non-homologous end-joining factor 1	OID44031	NHEJ1	0.0087	0.207	0.559218
Q5JS37	NHL repeat-containing protein 3	OID44811	NHLRC3	-0.0661	0.1079	0.759645
Q9NX24	H/ACA ribonucleoprotein complex subunit 2	OID42833	NHP2	0.6069	-0.3433	0.350378
Q96TA1	Protein Niban 2	OID40460	NIBAN2	-0.2566	-0.0602	0.0984833
P14543	Nidogen-1	OID45389	NID1	-0.2113	0.1457	0.959886
Q14112	Nidogen-2	OID45196	NID2	0.0627	0.0971	0.872632
Q86X76	Deaminated glutathione amidase	OID44032	NIT1	0.1295	-0.0085	0.559218
Q9NQR4	Omega-amidase NIT2	OID44812	NIT2	0.2321	0.206	0.759645
O15226	NF-kappa-B-repressing factor	OID41547	NKRF	0.1053	0.3157	0.203304
Q13232	Nucleoside diphosphate kinase 3	OID44813	NME3	-0.0745	-0.0209	0.759771
Q13287	N-myc-interactor	OID44033	NMI	0.194	0.4668	0.559722
Q9HAN9	Nicotinamide/nicotinic acid mononucleotide adenylyltransferase 1	OID44034	NMNAT1	0.0725	-0.0819	0.559722
Q9NPI5	Nicotinamide riboside kinase 2	OID41550	NMRK2	-0.4932	0.8599	0.203379
Q96S42	Nodal homolog	OID40462	NODAL	1.5651	-0.2797	0.0984898
Q13253	Noggin	OID42840	NOG	-0.3188	-0.0868	0.351403
P29475	Nitric oxide synthase, brain	OID42842	NOS1	0.1507	0.0434	0.351403
Q9Y314	Nitric oxide synthase-interacting protein	OID41551	NOSIP	-0.6211	-0.5309	0.203712
P46531	Neurogenic locus notch homolog protein 1	OID45198	NOTCH1	0.0016	0.0685	0.872842
Q04721	Neurogenic locus notch homolog protein 2	OID45199	NOTCH2	-0.1199	0.1118	0.872842
Q9UM47	Neurogenic locus notch homolog protein 3	OID45200	NOTCH3	0.2332	-0.1398	0.872842
P61916	NPC intracellular cholesterol transporter 2	OID45201	NPC2	0.3336	0.2299	0.873671
Q9NQX5	Neural proliferation differentiation and control protein 1	OID44815	NPDC1	-0.0135	0.048	0.759771
O60500	Nephrin	OID44036	NPHS1	-0.18	0.1065	0.561371
E9PJ23	Nuclear pore complex-interacting protein family member B6	OID41555	NPIPB6	-0.0865	-0.187	0.203712
Q9BXD5	N-acetylneuraminate lyase	OID44816	NPL	-0.6143	0.1732	0.762375
P06748	Nucleophosmin	OID44037	NPM1	0.1531	-0.1672	0.561371
P23582	C-type natriuretic peptide	OID44038	NPPC	-0.1739	-0.3293	0.562495
Q15818	Neuronal pentraxin-1	OID45202	NPTX1	-0.067	0.0229	0.873671
P47972	Neuronal pentraxin-2	OID45203	NPTX2	0.0064	0.1226	0.873671
O95502	Neuronal pentraxin receptor	OID44817	NPTXR	-0.0845	0.0068	0.762643
P15559	NAD(P)H dehydrogenase [quinone] 1	OID42849	NQO1	-0.3345	0.1283	0.351403
Q14995	Nuclear receptor subfamily 1 group D member 2	OID41556	NR1D2	0.3427	0.1956	0.203953
Q14994	Nuclear receptor subfamily 1 group I member 3	OID40465	NR1I3	-1.6025	-2.8421	0.0985685
P49116	Nuclear receptor subfamily 2 group C member 2	OID41557	NR2C2	0.1252	-1.0804	0.203953
Q92823	Neuronal cell adhesion molecule	OID44818	NRCAM	0.0362	0.1059	0.765175
Q16656	Nuclear respiratory factor 1	OID40468	NRF1	0.3479	-0.439	0.0990841
Q9NQ35	Nuclear receptor-interacting protein 3	OID40469	NRIP3	-0.7011	0.8053	0.0990841
O14786	Neuropilin-1	OID45391	NRP1	-0.0636	0.0525	0.960368
O60462	Neuropilin-2	OID45204	NRP2	-0.0506	0.0879	0.873915
P58400	Neurexin-1-beta	OID42852	NRXN1	0.3385	-0.0343	0.351403
Q9UNZ2	NSFL1 cofactor p47	OID44819	NSFL1C	1.2529	0.0128	0.765209
Q9BXI3	Cytosolic 5'-nucleotidase 1A	OID44040	NT5C1A	0.9824	0.0536	0.564996
P21589	5'-nucleotidase	OID44821	NT5E	-0.1404	0.1271	0.765209
P20783	Neurotrophin-3	OID44042	NTF3	-0.1419	0.1891	0.56693
Q9BSD7	Cancer-related nucleoside-triphosphatase	OID41563	NTPCR	-0.3387	-0.2532	0.203953
Q16620	BDNF/NT-3 growth factors receptor	OID44823	NTRK2	0.4186	0.0867	0.765209
Q9H093	NUAK family SNF1-like kinase 2	OID40471	NUAK2	0.9649	-0.3651	0.0995527
Q9Y5A7	NEDD8 ultimate buster 1	OID44043	NUB1	0.566	0.3974	0.56693
P80303	Nucleobindin-2	OID44045	NUCB2	-0.0133	-0.0712	0.56693
Q9Y266	Nuclear migration protein nudC	OID44046	NUDC	0.3143	0.033	0.566994
Q8IVD9	NudC domain-containing protein 3	OID44047	NUDCD3	1.1341	0.3046	0.566994
O95848	Uridine diphosphate glucose pyrophosphatase NUDT14	OID41565	NUDT14	4.7316	2.5406	0.203961
Q96DE0	U8 snoRNA-decapping enzyme	OID44049	NUDT16	0.5012	0.2345	0.566994
Q9UKK9	ADP-sugar pyrophosphatase	OID45205	NUDT5	0.3646	0.1429	0.875331
P0C024	Peroxisomal coenzyme A diphosphatase NUDT7	OID41566	NUDT7	0.1485	-0.0906	0.204294
Q7Z417	FMR1-interacting protein NUFIP2	OID41567	NUFIP2	1.253	-0.7396	0.204902
P49757	Protein numb homolog	OID44051	NUMB	-0.0637	-0.2627	0.566994
A6NNL0	NUT family member 2B	OID40475	NUTM2B	-4.0317	-1.6967	0.0999251
Q96CM4	Nucleoredoxin-like protein 1	OID41569	NXNL1	-1.3309	-1.5264	0.204902
O95157	Neurexophilin-3	OID44052	NXPH3	-0.277	-0.0335	0.566994
Q9NPH6	Odorant-binding protein 2b	OID44053	OBP2B	0.1308	0.0908	0.566994
Q5VST9	Obscurin	OID41570	OBSCN	-4.7229	1.6724	0.204902
Q16625	Occludin	OID44054	OCLN	0.1881	0.2054	0.566994
Q96NG3	Outer dynein arm-docking complex subunit 4	OID41571	ODAD4	-0.0272	0.4106	0.207493
O60502	Protein O-GlcNAcase	OID44055	OGA	0.0537	0.0565	0.567474
Q9NZT2	Opioid growth factor receptor	OID44056	OGFR	-0.0079	-0.042	0.567474
O15294	UDP-N-acetylglucosamine--peptide N-acetylglucosaminyltransferase 110 kDa subunit	OID42866	OGT	5.5427	-2.77	0.352067
O95897	Noelin-2	OID41573	OLFM2	0.1321	-0.1341	0.207698
Q6UX06	Olfactomedin-4	OID44825	OLFM4	0.8183	0.044	0.765209
P78380	Oxidized low-density lipoprotein receptor 1	OID44826	OLR1	0.5516	-0.0128	0.765209
Q99983	Osteomodulin	OID44827	OMD	0.0462	-0.0921	0.765209
P23515	Oligodendrocyte-myelin glycoprotein	OID44057	OMG	0.1402	0.23	0.567474
O60890	Oligophrenin-1	OID44058	OPHN1	1.3509	0.115	0.56788
O14841	5-oxoprolinase	OID44059	OPLAH	-0.2084	-0.0065	0.570213
Q9UBM4	Opticin	OID44060	OPTC	-0.6633	0.105	0.570735
P02763	Alpha-1-acid glycoprotein 1	OID45480	ORM1	0.0171	0.4381	0.992173
Q13438	Protein OS-9	OID41574	OS9	-0.017	0.0472	0.207698
Q9H1P3	Oxysterol-binding protein-related protein 2	OID44061	OSBPL2	0.3497	0.6231	0.571221
Q8IYS5	Osteoclast-associated immunoglobulin-like receptor	OID44828	OSCAR	0.0175	-0.0557	0.765209
Q9NX31	Oxidative stress-responsive serine-rich protein 1	OID41575	OSER1	1.4303	0.4727	0.207895
Q99650	Oncostatin-M-specific receptor subunit beta	OID45392	OSMR	0.0632	0.0924	0.960556
Q5VV17	OTU domain-containing protein 1	OID42870	OTUD1	-0.1321	-0.0494	0.352067
Q7L8S5	OTU domain-containing protein 6A	OID40482	OTUD6A	1.9765	-2.7766	0.100695
Q6GQQ9	OTU domain-containing protein 7B	OID44064	OTUD7B	0.4303	-0.2587	0.571768
Q8WZ82	Esterase OVCA2	OID42871	OVCA2	0.8365	0.0949	0.352388
P55809	Succinyl-CoA:3-ketoacid coenzyme A transferase 1, mitochondrial	OID44065	OXCT1	0.1646	0.1368	0.572109
P01178	Oxytocin-neurophysin 1	OID44829	OXT	-0.1254	0.0147	0.766399
Q92791	Endoplasmic reticulum protein SC65	OID41579	P3H4	-1.2337	2.4004	0.208367
P07237	Protein disulfide-isomerase	OID44830	P4HB	0.0232	0.2442	0.767709
Q8N7B6	PACRG-like protein	OID41581	PACRGL	0.3801	0.3826	0.208637
Q9UKS6	Protein kinase C and casein kinase substrate in neurons protein 3	OID41582	PACSIN3	-3.5674	0.9316	0.209202
Q9UM07	Protein-arginine deiminase type-4	OID42874	PADI4	0.6822	-0.2568	0.352672
Q9NWQ8	Phosphoprotein associated with glycosphingolipid-enriched microdomains 1	OID44069	PAG1	0.3598	0.1357	0.572605
Q9BTK6	PAXIP1-associated glutamate-rich protein 1	OID44070	PAGR1	0.3036	-0.2978	0.573752
Q9H074	Polyadenylate-binding protein-interacting protein 1	OID42876	PAIP1	0.0568	0.1049	0.352783
O75781	Paralemmin-1	OID44071	PALM	-0.2909	0.3111	0.573752
Q8IXS6	Paralemmin-2	OID44072	PALM2	-0.1128	0.2697	0.573752
P19021	Peptidyl-glycine alpha-amidating monooxygenase	OID45208	PAM	0.0895	0.0358	0.875922
Q6UXH9	Inactive serine protease PAMR1	OID45209	PAMR1	-0.065	-0.0178	0.876599
Q8TEW0	Partitioning defective 3 homolog	OID42881	PARD3	-0.5519	0.2024	0.352783
Q8TEW8	Partitioning defective 3 homolog B	OID41584	PARD3B	0.6403	0.2404	0.209244
Q99497	Parkinson disease protein 7	OID45210	PARK7	1.1996	0.2387	0.876599
Q53GL7	Protein mono-ADP-ribosyltransferase PARP10	OID41587	PARP10	0.2839	0.0104	0.210156
Q9NWS1	PCNA-interacting partner	OID41589	PARPBP	-0.9904	-1.0028	0.210156
Q8IV76	Circadian clock protein PASD1	OID40489	PASD1	0.87	0.4101	0.100779
Q8NI35	InaD-like protein	OID41590	PATJ	0.3064	-0.2676	0.210156
Q96AQ6	Pre-B-cell leukemia transcription factor-interacting protein 1	OID44074	PBXIP1	-0.1611	0.0513	0.573898
P61457	Pterin-4-alpha-carbinolamine dehydratase	OID44832	PCBD1	-0.0949	0.1569	0.768922
Q15366	Poly(rC)-binding protein 2	OID44075	PCBP2	-0.1193	-0.0977	0.573898
Q9P2E7	Protocadherin-10	OID41593	PCDH10	0.9368	-0.5054	0.211047
Q9NPG4	Protocadherin-12	OID44076	PCDH12	-0.3288	0.115	0.574101
O14917	Protocadherin-17	OID44834	PCDH17	0.1219	-0.1228	0.768922
O60245	Protocadherin-7	OID44077	PCDH7	-0.1021	-0.3862	0.575013
Q9HC56	Protocadherin-9	OID44078	PCDH9	0.0991	-0.0176	0.575833
Q9Y5I3	Protocadherin alpha-1	OID41594	PCDHA1	4.8648	-2.0875	0.211556
Q15154	Pericentriolar material 1 protein	OID40493	PCM1	0.2307	-0.1575	0.100816
P12004	Proliferating cell nuclear antigen	OID41595	PCNA	2.6577	-1.996	0.212841
Q15113	Procollagen C-endopeptidase enhancer 1	OID45393	PCOLCE	-0.03	0.0267	0.96076
Q16549	Proprotein convertase subtilisin/kexin type 7	OID44080	PCSK7	-0.0859	-0.008	0.575833
Q8NBP7	Proprotein convertase subtilisin/kexin type 9	OID45211	PCSK9	-0.323	-0.0138	0.876599
Q99447	Ethanolamine-phosphate cytidylyltransferase	OID44081	PCYT2	0.2131	0.0145	0.575947
P20941	Phosducin	OID41597	PDC	-0.1458	-0.1469	0.212841
Q16342	Programmed cell death protein 2	OID41598	PDCD2	0.6859	-0.8445	0.212841
O14737	Programmed cell death protein 5	OID44836	PDCD5	0.5102	0.1261	0.769559
O75340	Programmed cell death protein 6	OID44837	PDCD6	0.0727	0.0815	0.770832
P04085	Platelet-derived growth factor subunit A	OID45212	PDGFA	0.0391	0.0092	0.876599
P01127	Platelet-derived growth factor subunit B	OID44839	PDGFB	-0.0616	0.0285	0.770832
Q9GZP0	Platelet-derived growth factor D	OID44840	PDGFD	-0.0769	-0.0033	0.770832
P16234	Platelet-derived growth factor receptor alpha	OID44841	PDGFRA	0.0988	0.0891	0.771678
P09619	Platelet-derived growth factor receptor beta	OID45213	PDGFRB	0.1549	0.0257	0.876599
P13667	Protein disulfide-isomerase A4	OID45214	PDIA4	0.1578	0.2435	0.877363
O00151	PDZ and LIM domain protein 1	OID45215	PDLIM1	0.1307	-0.3581	0.877363
Q9P0J1	[Pyruvate dehydrogenase [acetyl-transferring]]-phosphatase 1, mitochondrial	OID42894	PDP1	1.3525	0.078	0.353227
O15018	PDZ domain-containing protein 2	OID42897	PDZD2	0.3151	0.1784	0.353227
Q5T2W1	Na(+)/H(+) exchange regulatory cofactor NHE-RF3	OID44085	PDZK1	-0.0277	0.1202	0.575947
Q9UPQ7	E3 ubiquitin-protein ligase PDZRN3	OID40497	PDZRN3	0.0977	-0.6092	0.100864
Q6ZMN7	PDZ domain-containing RING finger protein 4	OID41606	PDZRN4	-1.5455	-1.0299	0.213325
P30086	Phosphatidylethanolamine-binding protein 1	OID45217	PEBP1	1.0674	0.17	0.878043
Q96S96	Phosphatidylethanolamine-binding protein 4	OID42898	PEBP4	-0.1974	-0.0843	0.353227
P16284	Platelet endothelial cell adhesion molecule	OID45218	PECAM1	-0.0406	0.0783	0.878918
Q9BY49	Peroxisomal trans-2-enoyl-CoA reductase	OID44086	PECR	0.0405	0.0976	0.576441
P01210	Proenkephalin-A	OID44844	PENK	-0.1667	-0.1626	0.771678
P12955	Xaa-Pro dipeptidase	OID45394	PEPD	0.2194	0.1195	0.96076
P02776	Platelet factor 4	OID45395	PF4	0.1935	-0.2039	0.96076
Q9UHV9	Prefoldin subunit 2	OID44088	PFDN2	0.4248	0.3219	0.576516
O15212	Prefoldin subunit 6	OID42901	PFDN6	0.9689	-1.1859	0.353802
P16118	6-phosphofructo-2-kinase/fructose-2,6-bisphosphatase 1	OID40500	PFKFB1	3.3109	-3.1333	0.100902
O60825	6-phosphofructo-2-kinase/fructose-2,6-bisphosphatase 2	OID44089	PFKFB2	-0.1458	-0.2944	0.576576
Q16877	6-phosphofructo-2-kinase/fructose-2,6-bisphosphatase 4	OID40501	PFKFB4	-0.038	-3.3215	0.10149
P0DJD7	Pepsin A-4	OID45396	PGA4	-0.0926	0.0575	0.96076
O75594	Peptidoglycan recognition protein 1	OID45219	PGLYRP1	0.4833	0.058	0.878918
Q96PD5	N-acetylmuramoyl-L-alanine amidase	OID45481	PGLYRP2	0.0216	0.0431	0.993021
Q96LB9	Peptidoglycan recognition protein 3	OID44091	PGLYRP3	-0.1599	0.131	0.576673
Q96LB8	Peptidoglycan recognition protein 4	OID42902	PGLYRP4	-0.4238	-0.1523	0.354351
O95394	Phosphoacetylglucosamine mutase	OID41608	PGM3	0.9339	-2.6798	0.213334
Q9C0D0	Phosphatase and actin regulator 1	OID41609	PHACTR1	-4.4361	2.5368	0.213576
O75167	Phosphatase and actin regulator 2	OID44092	PHACTR2	0.2037	-0.1187	0.576769
Q96QT6	PHD finger protein 12	OID41611	PHF12	0.184	0.5355	0.213898
Q9BVI0	PHD finger protein 20	OID42905	PHF20	0.0866	-0.2321	0.354868
Q9UPV7	PHD finger protein 24	OID41614	PHF24	1.0176	0.3401	0.213898
Q86UU1	Pleckstrin homology-like domain family B member 1	OID44093	PHLDB1	0.2346	0.2734	0.576801
Q86SQ0	Pleckstrin homology-like domain family B member 2	OID42906	PHLDB2	0.9164	-0.1927	0.354868
Q6NSJ2	Pleckstrin homology-like domain family B member 3	OID40502	PHLDB3	-1.0655	0.2212	0.101727
Q8TCT1	Phosphoethanolamine/phosphocholine phosphatase	OID44094	PHOSPHO1	-0.0881	0.1313	0.57716
Q8IUZ5	5-phosphohydroxy-L-lysine phospho-lyase	OID44846	PHYKPL	-0.0415	-0.0108	0.771678
Q6UXB8	Peptidase inhibitor 16	OID45397	PI16	-0.1144	0.0624	0.96108
P19957	Elafin	OID45220	PI3	0.0539	-0.329	0.878918
Q8WXW3	Progesterone-induced-blocking factor 1	OID44095	PIBF1	0.82	0.0619	0.577526
P01833	Polymeric immunoglobulin receptor	OID45221	PIGR	0.0191	-0.0134	0.879865
Q6ZUJ8	Phosphoinositide 3-kinase adapter protein 1	OID44096	PIK3AP1	0.0463	-0.361	0.577714
Q96FE7	Phosphoinositide-3-kinase-interacting protein 1	OID45222	PIK3IP1	-0.0263	0.0451	0.881445
Q9UKJ1	Paired immunoglobulin-like type 2 receptor alpha	OID45223	PILRA	-0.1278	0.1338	0.881445
Q9UKJ0	Paired immunoglobulin-like type 2 receptor beta	OID44847	PILRB	-0.047	0.0506	0.772326
A6NC86	phospholipase A2 inhibitor and Ly6/PLAUR domain-containing protein	OID44848	PINLYP	0.4999	-0.1147	0.772326
Q7Z3Z4	Piwi-like protein 4	OID41617	PIWIL4	-0.1506	0.1797	0.214236
Q8NG27	E3 ubiquitin-protein ligase Praja-1	OID41618	PJA1	-0.1051	-0.0722	0.214532
O43164	E3 ubiquitin-protein ligase Praja-2	OID42910	PJA2	0.423	-0.3636	0.354985
P98161	Polycystin-1	OID44849	PKD1	-0.0288	-0.0097	0.772326
P30613	Pyruvate kinase PKLR	OID44850	PKLR	0.6706	0.0435	0.772331
O15496	Group 10 secretory phospholipase A2	OID44098	PLA2G10	-0.2345	0.07	0.578045
Q8NCC3	Phospholipase A2 group XV	OID44852	PLA2G15	-0.1092	0.0888	0.772828
P04054	Phospholipase A2	OID45224	PLA2G1B	-0.0441	0.0626	0.882052
P14555	Phospholipase A2, membrane associated	OID45225	PLA2G2A	0.2794	-0.1389	0.882052
P47712	Cytosolic phospholipase A2	OID44853	PLA2G4A	0.3262	-0.0664	0.773666
Q13093	Platelet-activating factor acetylhydrolase	OID45226	PLA2G7	-0.136	0.0928	0.882876
P00749	Urokinase-type plasminogen activator	OID45227	PLAU	0.0031	0.1378	0.882876
Q03405	Urokinase plasminogen activator surface receptor	OID44854	PLAUR	0.5447	0.0813	0.773666
Q6P1J6	Phospholipase B1, membrane-associated	OID44099	PLB1	-0.0669	0.2102	0.579356
Q00722	1-phosphatidylinositol 4,5-bisphosphate phosphodiesterase beta-2	OID44100	PLCB2	0.6421	0.3879	0.579527
Q4KWH8	1-phosphatidylinositol 4,5-bisphosphate phosphodiesterase eta-1	OID41622	PLCH1	-3.8537	-0.1799	0.215465
O95397	Putative protein PLEKHA9	OID40508	PLEKHA8P1	6.5228	-1.1783	0.101727
P00747	Plasminogen	OID45482	PLG	-0.043	-0.026	0.993021
O60240	Perilipin-1	OID42916	PLIN1	-0.3161	0.2756	0.355305
O60664	Perilipin-3	OID44855	PLIN3	0.7273	0.1194	0.773666
Q9NYY3	Serine/threonine-protein kinase PLK2	OID41631	PLK2	1.1067	-0.4946	0.215545
O94903	Pyridoxal phosphate homeostasis protein	OID44856	PLPBP	0.8501	0.1656	0.773666
O43660	Pleiotropic regulator 1	OID41633	PLRG1	0.6615	-0.2307	0.215545
Q9NRY6	Phospholipid scramblase 3	OID44102	PLSCR3	0.8261	-0.0057	0.579527
P55058	Phospholipid transfer protein	OID45228	PLTP	-0.0301	0.0686	0.884572
Q8IUK5	Plexin domain-containing protein 1	OID42917	PLXDC1	-0.4445	0.1272	0.35631
O15031	Plexin-B2	OID45229	PLXNB2	-0.0365	0.0094	0.886501
[truncated: 801 more rows]
