# Supplementary material for: Impact of Delayed Biospecimen Processing on Serum Proteomics in Samples from a Parabolic Flight
Source: Research Square preprint supplement (doi:10.21203/rs.3.rs-7530087/v1), 2025-09-24
Supplement: Supplementary file 6 [file 7f6abf3ad93f6369b5faff70.xlsx]

## Sheet: Table S9
Supplemental Table 9. Eighty-four proteins exhibited significant dysregulation, with expression changes of two-fold or greater.
Glossary of terms
UniProt ID	A unique identifier assigned by the UniProt database to a specific protein
Protein name	The common or scientific name of the protein associated with the UniProt ID
OlinkID	Identifier used by Olink Proteomics for a specific protein assay in OLINK Explore HT panel
Gene Name	The name of the gene that encodes the protein
0-24h	Expression changes of two-fold or greater at 0-24h
24-48h	Expression changes of two-fold or greater at 24-48h
UniProt ID	Protein name	OlinkID	Gene Name	0-24h	24-48h
Q2M1Z3	Rho GTPase-activating protein 31	OID40814	ARHGAP31	3.83737	1.64102
Q9NWX5	Ankyrin repeat and SOCS box protein 6	OID40039	ASB6	-3.91259	-1.04274
Q9UBW5	Bridging integrator 2	OID45042	BIN2	2.01521	0.237663
Q07108	Early activation antigen CD69	OID44517	CD69	2.18578	0.47778
Q6ZU80	Centrosomal protein of 128 kDa	OID42272	CEP128	2.01996	0.263219
Q13561	Dynactin subunit 2	OID43596	DCTN2	2.7517	0.380311
P23743	Diacylglycerol kinase alpha	OID43605	DGKA	2.34754	0.243162
P78352	Disks large homolog 4	OID43611	DLG4	2.20073	0.35412
Q9NZN3	EH domain-containing protein 3	OID43661	EHD3	2.18441	0.486555
Q04637	Eukaryotic translation initiation factor 4 gamma 1	OID43668	EIF4G1	2.15497	0.202846
O43768	Alpha-endosulfine	OID42412	ENSA	5.80798	0.979084
Q9BVG8	Kinesin-like protein KIFC3	OID43893	KIFC3	2.56132	0.369712
O15479	Melanoma-associated antigen B2	OID42726	MAGEB2	2.09157	0.389762
P25325	3-mercaptopyruvate sulfurtransferase	OID42771	MPST	2.32497	0.183573
O14745	Na(+)/H(+) exchange regulatory cofactor NHE-RF1	OID44938	NHERF1	2.49163	0.223665
Q9BRX2	Protein pelota homolog	OID42899	PELO	2.20701	0.229074
Q14BN4	Sarcolemmal membrane-associated protein	OID44258	SLMAP	2.03219	0.359668
P0DMP2	SLIT-ROBO Rho GTPase-activating protein 2B	OID40622	SRGAP2B	5.49583	1.30889
Q96A49	Synapse-associated protein 1	OID44968	SYAP1	2.75821	0.374453
Q15643	Thyroid receptor-interacting protein 11	OID44363	TRIP11	2.41299	0.468557
Q99576	TSC22 domain family protein 3	OID41961	TSC22D3	2.49528	0.0254418
Q9BZF9	Uveal autoantigen with coiled-coil domains and ankyrin repeats	OID45006	UACA	2.04827	0.32157
Q9H7M9	V-type immunoglobulin domain-containing suppressor of T-cell activation	OID45015	VSIR	2.53975	0.463361
Q8NB46	Serine/threonine-protein phosphatase 6 regulatory ankyrin repeat subunit C	OID40800	ANKRD52	6.75553	-2.12669
Q6Q8B3	Cell surface glycoprotein CD200 receptor 2	OID40967	CD200R1L	-2.69741	1.92076
Q96MC2	Dynein regulatory complex protein 1	OID40175	DRC1	6.90707	-1.05918
Q86XD5	Protein FAM131B	OID41183	FAM131B	7.8412	-3.63401
Q9NZD2	Glycolipid transfer protein	OID40269	GLTP	-2.06717	1.40454
Q99456	Keratin, type I cytoskeletal 12	OID40359	KRT12	5.33649	-5.15891
O15539	Regulator of G-protein signaling 5	OID40561	RGS5	5.31791	-5.14032
Q7Z5L4	Spermatogenesis-associated protein 19, mitochondrial	OID40615	SPATA19	6.13676	-1.00131
O75132	Zinc finger BED domain-containing protein 4	OID42039	ZBED4	2.59753	-0.867681
Q9H845	Complex I assembly factor ACAD9, mitochondrial	OID40004	ACAD9	3.72406	-0.31226
Q7Z6K5	Arpin	OID40825	ARPIN	-6.33629	0.363998
Q9NYF8	Bcl-2-associated transcription factor 1	OID40857	BCLAF1	-4.15589	-0.630345
Q13489	Baculoviral IAP repeat-containing protein 3	OID40058	BIRC3	5.41101	0.593436
Q5H9B9	Putative BMP-2-inducible kinase-like protein	OID40866	BMP2KL	2.81608	0.402372
Q9Y2F9	BTB/POZ domain-containing protein 3	OID40874	BTBD3	-4.14943	1.13499
Q6UXG8	Butyrophilin-like protein 9	OID40878	BTNL9	7.22257	-0.334177
Q8IYJ2	Uncharacterized protein C10orf67, mitochondrial	OID40070	C10ORF67	-2.23901	-0.168364
Q8IXR9	Uncharacterized protein C12orf56	OID40883	C12ORF56	-4.75621	-0.0537078
O14523	Phospholipid transfer protein C2CD2L	OID42202	C2CD2L	2.49574	0.188278
P80098	C-C motif chemokine 7	OID43474	CCL7	3.61965	1.46587
Q69YH5	Cell division cycle-associated protein 2	OID40099	CDCA2	8.37259	-0.417624
Q8N8E3	Centrosomal protein of 112 kDa	OID42270	CEP112	5.74418	0.0172586
P10145	Interleukin-8	OID43586	CXCL8	6.46964	0.173206
A8MQ03	Cysteine-rich tail protein 1	OID40146	CYSRT1	-5.46141	-0.168364
Q9C098	Serine/threonine-protein kinase DCLK3	OID40151	DCLK3	-5.07833	-0.297404
Q8WXX0	Dynein axonemal heavy chain 7	OID40167	DNAH7	5.77267	-0.241814
P59910	DnaJ homolog subfamily B member 13	OID41113	DNAJB13	2.14792	0.308343
Q96BY6	Dedicator of cytokinesis protein 10	OID41119	DOCK10	2.05032	-0.202562
P51452	Dual specificity protein phosphatase 3	OID42390	DUSP3	2.07991	0.125919
Q6ZTU2	Putative EP400-like protein	OID40201	EP400P1	5.7669	-0.153764
Q03828	Homeobox even-skipped homolog protein 2	OID40210	EVX2	-2.01144	0.412944
Q9UPT5	Exocyst complex component 7	OID41176	EXOC7	2.33999	-0.122619
Q6PCT2	F-box/LRR-repeat protein 19	OID40232	FBXL19	6.92016	-0.368313
Q9NWM8	Peptidyl-prolyl cis-trans isomerase FKBP14	OID43715	FKBP14	2.08084	0.266021
P69892	Hemoglobin subunit gamma-2	OID41280	HBG2	7.37017	1.03749
Q9P2P5	E3 ubiquitin-protein ligase HECW2	OID40284	HECW2	5.34511	0.928257
Q14627	Interleukin-13 receptor subunit alpha-2	OID42601	IL13RA2	6.43898	-0.0568995
P05112	Interleukin-4	OID42627	IL4	7.18423	0.212792
Q13576	Ras GTPase-activating-like protein IQGAP2	OID43869	IQGAP2	2.33522	0.275525
P20702	Integrin alpha-X	OID42638	ITGAX	6.53297	0.347523
Q9NZV8	Potassium voltage-gated channel subfamily D member 2	OID41359	KCND2	5.04382	0.228728
Q9BPZ7	Target of rapamycin complex 2 subunit MAPKAP1	OID41451	MAPKAP1	2.93362	0.0381744
P10636	Microtubule-associated protein tau	OID42741	MAPT	6.22562	0.580362
Q9H2K0	Translation initiation factor IF-3, mitochondrial	OID43995	MTIF3	6.9909	-0.418205
Q02045	Myosin light chain 5	OID41506	MYL5	6.22954	-0.631203
Q9Y4I1	Unconventional myosin-Va	OID41511	MYO5A	2.19521	0.272231
Q9H0P0	Cytosolic 5'-nucleotidase 3A	OID44041	NT5C3A	2.17104	-0.10617
O75665	Centriole and centriolar satellite protein OFD1	OID42865	OFD1	2.20409	-0.432395
O75335	Liprin-alpha-4	OID41651	PPFIA4	6.8466	0.283935
Q13976	cGMP-dependent protein kinase 1	OID44870	PRKG1	2.32517	0.167891
Q96B01	RAD51-associated protein 1	OID41692	RAD51AP1	5.18888	0.0396615
Q96D71	RalBP1-associated Eps domain-containing protein 1	OID43005	REPS1	3.14804	0.137728
Q9Y3A5	Ribosome maturation protein SBDS	OID41768	SBDS	2.41593	-0.0857111
Q93073	Selenocysteine insertion sequence-binding protein 2-like	OID40589	SECISBP2L	6.73244	-0.103209
Q16181	Septin-7	OID43063	SEPTIN7	2.11471	-0.0462423
A6NMZ2	Sentan	OID40610	SNTN	6.55474	0.426066
Q96KW9	Sperm acrosome-associated protein 7	OID40613	SPACA7	2.13925	0.716697
Q496A3	Spermatogenesis-associated serine-rich protein 1	OID41853	SPATS1	-6.56222	-0.603405
Q9Y458	T-box transcription factor TBX22	OID40649	TBX22	-7.4564	0.34925
Q9P202	Whirlin	OID40714	WHRN	-6.58791	0.230024
O60481	Zinc finger protein ZIC 3	OID42054	ZIC3	5.92942	0.0326474
