# Supplementary material for: Impact of Delayed Biospecimen Processing on Serum Proteomics in Samples from a Parabolic Flight
Source: Research Square preprint supplement (doi:10.21203/rs.3.rs-7530087/v1), 2025-09-24
Supplement: Supplementary file 7 [file aca548d72f7c9f791be043e0.xlsx]

## Sheet: Table S1
Supplemental Table 1. Group 1: Not stable at 24 and 48h.
Glossary of terms
UniProt ID	A unique identifier assigned by the UniProt database to a specific protein
Protein name	The common or scientific name of the protein associated with the UniProt ID
OlinkID	Identifier used by Olink Proteomics for a specific protein assay in OLINK Explore HT panel
Gene Name	The name of the gene that encodes the protein
NPX difference From0to24h	The change in NPX (Normalized Protein eXpression) values between 0 and 24h. NPX is a relative quantification metric used in Olink assays.
NPX difference From24to48h	The change in NPX values between 24 and 48h
Adjusted_pval in lmer results	The adjusted p-value from a linear mixed-effects model (lmer), accounting for multiple testing. Used to assess statistical significance of protein expression changes over time.
From0to24h, Adjusted pvalue in post hoc	Adjusted p-value from post hoc analysis comparing 0 to 24h. Indicates whether the change is statistically significant after correction.
From24to48h, Adjusted pvalue in post hoc	Adjusted p-value from post hoc analysis comparing 24 to 48h.
UniProt ID	Protein name	OlinkID	Gene Name	NPX difference From0to24h	NPX difference From24to48h	Adjusted_pval in lmer results	From0to24h, Adjusted pvalue in post hoc	From24to48h, Adjusted pvalue in post hoc
Q4VCS5	Angiomotin	OID44458	AMOT	0.365778	0.186881	0.0233357	0.010329	0.0221249
Q8NEU8	DCC-interacting protein 13-beta	OID44468	APPL2	0.82393	0.45425	0.00172498	0.000249491	0.000423305
Q2M1Z3	Rho GTPase-activating protein 31	OID40814	ARHGAP31	3.83737	1.64102	0.0125287	0.00298401	0.0156693
Q9NWX5	Ankyrin repeat and SOCS box protein 6	OID40039	ASB6	-3.91259	-1.04274	0.00850606	0.00114185	0.0272319
Q8NDB2	B-cell scaffold protein with ankyrin repeats	OID43406	BANK1	-0.371607	-0.283085	0.0464882	0.0495735	0.0283438
Q9UBW5	Bridging integrator 2	OID45042	BIN2	2.01521	0.237663	0.000460304	5.35848e-06	0.00505168
O60238	BCL2/adenovirus E1B 19 kDa protein-interacting protein 3-like	OID43419	BNIP3L	0.532689	0.231796	0.00456504	0.000824804	0.0034693
P01024	Complement C3	OID45445	C3	0.671021	0.610695	0.00299326	0.00170256	0.000422144
Q9P1Z2	Calcium-binding and coiled-coil domain-containing protein 1	OID43445	CALCOCO1	1.88678	0.346127	0.000403918	2.09441e-06	0.000617964
P25942	Tumor necrosis factor receptor superfamily member 5	OID44514	CD40	0.286209	0.235632	0.0151984	0.0137578	0.00539071
P15529	Membrane cofactor protein	OID45329	CD46	0.945117	0.2541	0.00264999	0.000198668	0.00532234
Q07108	Early activation antigen CD69	OID44517	CD69	2.18578	0.47778	0.00041189	4.21394e-06	0.000424802
Q49AH0	Cerebral dopamine neurotrophic factor	OID43510	CDNF	0.271735	0.20907	0.00185395	0.000526155	0.000249531
Q8N2Z9	Centromere protein S	OID40103	CENPS	-0.291505	-0.197025	0.0499748	0.0442082	0.0367367
O60308	Centrosomal protein of 104 kDa	OID42269	CEP104	0.855079	0.102679	0.00170345	7.57267e-05	0.0318095
Q6ZU80	Centrosomal protein of 128 kDa	OID42272	CEP128	2.01996	0.263219	0.00233508	0.000118052	0.038731
Q66GS9	Centrosomal protein of 135 kDa	OID43516	CEP135	1.20696	0.419067	0.0172514	0.00409819	0.0344446
O43822	Cilia- and flagella-associated protein 410	OID42284	CFAP410	1.70111	0.434692	0.00010338	1.32179e-09	2.75434e-05
Q96JM3	Chromosome alignment-maintaining phosphoprotein 1	OID40114	CHAMP1	-1.44618	-0.661732	0.00308457	0.000468709	0.00165253
Q8NCG5	Carbohydrate sulfotransferase 4	OID41018	CHST4	-0.494697	-0.221525	0.0332889	0.0138613	0.0454966
Q9Y240	C-type lectin domain family 11 member A	OID45074	CLEC11A	0.137838	0.0771188	0.0255551	0.0135378	0.0211208
Q9BXN2	C-type lectin domain family 7 member A	OID43538	CLEC7A	0.160547	0.17473	0.00760691	0.00999985	0.00131396
Q9UDT6	CAP-Gly domain-containing linker protein 2	OID43539	CLIP2	1.076	0.211251	0.00233508	0.000136898	0.0111844
Q9BSW2	EF-hand calcium-binding domain-containing protein 4B	OID42320	CRACR2A	1.17048	0.16216	0.000337465	7.05082e-07	0.00123545
Q99062	Granulocyte colony-stimulating factor receptor	OID43573	CSF3R	0.238266	0.241924	0.0136144	0.0189882	0.00342582
Q99895	Chymotrypsin-C	OID44577	CTRC	-0.454349	-0.301282	0.0178264	0.0225736	0.0301664
P14868	Aspartate--tRNA ligase, cytoplasmic	OID43591	DARS1	1.6578	0.174713	0.000758972	2.74156e-05	0.0198539
Q13561	Dynactin subunit 2	OID43596	DCTN2	2.7517	0.380311	0.00293843	0.000156701	0.0424332
P23743	Diacylglycerol kinase alpha	OID43605	DGKA	2.34754	0.243162	0.000532694	1.32007e-05	0.0130142
P78352	Disks large homolog 4	OID43611	DLG4	2.20073	0.35412	0.000460304	6.35231e-06	0.00169944
O60884	DnaJ homolog subfamily A member 2	OID43615	DNAJA2	1.06602	0.163654	0.00299326	0.000174833	0.0334148
Q99615	DnaJ homolog subfamily C member 7	OID44608	DNAJC7	1.595	0.354715	0.00373012	0.000299698	0.015575
Q9UQ16	Dynamin-3	OID43626	DNM3	0.535219	0.170213	0.00041189	8.23938e-06	0.000146245
P01133	Pro-epidermal growth factor	OID44618	EGF	0.563283	0.17053	0.00413225	0.000451123	0.00755664
Q9NZN3	EH domain-containing protein 3	OID43661	EHD3	2.18441	0.486555	0.000403918	3.48177e-06	0.000361469
Q04637	Eukaryotic translation initiation factor 4 gamma 1	OID43668	EIF4G1	2.15497	0.202846	0.00106915	4.29103e-05	0.0413874
O43768	Alpha-endosulfine	OID42412	ENSA	5.80798	0.979084	0.00086975	4.02318e-05	0.00555024
Q9Y2J2	Band 4.1-like protein 3	OID42415	EPB41L3	0.416141	0.248589	0.0121935	0.00524966	0.00662574
O14944	Proepiregulin	OID43688	EREG	1.6668	0.936155	0.00233508	0.000395095	0.000638102
P50548	ETS domain-containing transcription factor ERF	OID42424	ERF	0.396266	0.224878	0.0173494	0.00824379	0.0122423
Q9Y3D6	Mitochondrial fission 1 protein	OID44656	FIS1	1.41935	0.260474	0.00213622	0.000116412	0.0118927
P19883	Follistatin	OID44662	FST	-0.269413	-0.222487	0.00993372	0.00676717	0.0034158
O95954	Formimidoyltransferase-cyclodeaminase	OID43731	FTCD	-0.223872	-0.0758267	0.00210584	0.000172878	0.00189842
Q9UBU3	Appetite-regulating hormone	OID44681	GHRL	-1.06309	-0.518954	0.0136144	0.00456316	0.0118166
Q9NSB8	Homer protein homolog 2	OID44704	HOMER2	1.76431	0.269894	0.000436552	4.47091e-06	0.00173474
Q14773	Intercellular adhesion molecule 4	OID43827	ICAM4	0.192762	0.204142	0.0030703	0.00259106	0.0003548
P38484	Interferon gamma receptor 2	OID43834	IFNGR2	0.248428	0.0541931	0.00413225	0.000315849	0.0205526
Q96F46	Interleukin-17 receptor A	OID45155	IL17RA	0.427037	0.115373	0.000567988	2.99068e-05	0.00063461
Q5VWK5	Interleukin-23 receptor	OID43850	IL23R	-0.147251	-0.0382494	0.000504022	1.98859e-05	0.000533881
Q06033	Inter-alpha-trypsin inhibitor heavy chain H3	OID45378	ITIH3	0.731281	0.370197	0.0136177	0.00476835	0.0114821
Q9BVG8	Kinesin-like protein KIFC3	OID43893	KIFC3	2.56132	0.369712	0.000504022	1.25016e-05	0.00376955
Q93052	Lipoma-preferred partner	OID43932	LPP	0.38912	0.20237	0.0165617	0.00660103	0.0135625
O15479	Melanoma-associated antigen B2	OID42726	MAGEB2	2.09157	0.389762	0.00609147	0.000537034	0.0464399
P55145	Mesencephalic astrocyte-derived neurotrophic factor	OID44766	MANF	1.73249	0.125963	0.00010338	5.57955e-09	0.00206239
Q14696	LRP chaperone MESD	OID45182	MESD	0.42227	0.208185	0.00704728	0.0017104	0.00441442
A9UHW6	MIF4G domain-containing protein	OID43973	MIF4GD	0.631273	0.165087	0.000865564	5.21979e-05	0.00123969
P25325	3-mercaptopyruvate sulfurtransferase	OID42771	MPST	2.32497	0.183573	0.000337465	6.34852e-07	0.00926037
Q969H8	Myeloid-derived growth factor	OID44797	MYDGF	1.89351	0.255991	0.000597039	2.00717e-05	0.00650473
Q08AG7	Mitotic-spindle organizing protein 1	OID42800	MZT1	1.46239	0.270121	0.00107319	5.59251e-05	0.00503808
Q0ZGT2	Nexilin	OID45388	NEXN	0.337703	0.192566	0.0338339	0.0196327	0.0310563
O95644	Nuclear factor of activated T-cells, cytoplasmic 1	OID44026	NFATC1	-0.365437	-0.276744	0.00308457	0.00118031	0.00060099
O14745	Na(+)/H(+) exchange regulatory cofactor NHE-RF1	OID44938	NHERF1	2.49163	0.223665	0.000597039	1.73458e-05	0.0251004
O60936	Nucleolar protein 3	OID44814	NOL3	0.217742	0.118248	0.0239163	0.0119115	0.0204201
Q15155	Nodal modulator 1	OID45197	NOMO1	0.140955	0.0913045	0.048112	0.0393395	0.0371667
Q86UD1	Out at first protein homolog	OID45206	OAF	-0.146461	-0.131688	0.0321051	0.0424181	0.013819
P30039	Phenazine biosynthesis-like domain-containing protein	OID42883	PBLD	-0.675062	-0.28195	0.0042458	0.000572187	0.00427105
O00408	cGMP-dependent 3',5'-cyclic phosphodiesterase	OID41601	PDE2A	0.708416	0.272727	0.0129252	0.00306465	0.0187851
Q5VY43	Platelet endothelial aggregation receptor 1	OID45216	PEAR1	0.44042	0.165299	0.0266769	0.00829162	0.0494602
Q9BRX2	Protein pelota homolog	OID42899	PELO	2.20701	0.229074	2.05538e-05	1.2984e-09	8.20308e-05
P52209	6-phosphogluconate dehydrogenase, decarboxylating	OID44845	PGD	0.913458	0.681572	0.0329815	0.0310865	0.0180239
Q9BZM1	Group XIIA secretory phospholipase A2	OID44851	PLA2G12A	0.984325	0.35399	0.0166252	0.00407868	0.0305756
P53816	Phospholipase A and acyltransferase 3	OID40507	PLAAT3	0.457051	0.782234	0.00242024	0.0384793	0.000320434
Q9ULL4	Plexin-B3	OID44857	PLXNB3	0.727016	0.23747	0.00167949	0.000122437	0.00147947
Q6GTS8	N-fatty-acyl-amino acid synthase/hydrolase PM20D1	OID44858	PM20D1	0.0159007	0.0820642	0.000504022	0.0266246	7.7715e-06
P23284	Peptidyl-prolyl cis-trans isomerase B	OID45231	PPIB	1.1808	0.189736	0.000791426	3.47569e-05	0.00529849
P58294	Prokineticin-1	OID44127	PROK1	-0.427723	-0.246857	0.000532694	0.000152964	0.000550338
P18031	Tyrosine-protein phosphatase non-receptor type 1	OID44148	PTPN1	0.572286	0.127142	0.00860307	0.0010185	0.0448246
P08575	Receptor-type tyrosine-protein phosphatase C	OID45240	PTPRC	0.0479667	0.0296439	0.0136177	0.00684346	0.00745008
P20472	Parvalbumin alpha	OID44155	PVALB	0.946614	0.10582	0.000460304	4.5982e-06	0.00572803
O14828	Secretory carrier-associated membrane protein 3	OID44209	SCAMP3	0.891129	0.118412	0.000460304	6.59927e-06	0.00359361
Q14162	Scavenger receptor class F member 1	OID45250	SCARF1	1.0164	0.221398	0.00704728	0.000701039	0.0363152
Q86SQ7	Serologically defined colon cancer antigen 8	OID44219	SDCCAG8	1.96612	0.3283	0.00294045	0.000170141	0.0246592
P49908	Selenoprotein P	OID45488	SELENOP	-0.640581	-0.209504	0.000460304	1.68588e-05	0.000212818
P16109	P-selectin	OID45410	SELP	1.27203	0.207027	0.00322027	0.000199724	0.0316639
Q96ES7	SAGA-associated factor 29	OID43067	SGF29	1.40162	0.345462	0.00798856	0.000975433	0.0309695
A1X283	SH3 and PX domain-containing protein 2B	OID44242	SH3PXD2B	1.35071	0.259564	0.00460169	0.000387423	0.0321938
Q14BN4	Sarcolemmal membrane-associated protein	OID44258	SLMAP	2.03219	0.359668	0.00174456	8.98885e-05	0.0101531
Q9H040	DNA-dependent metalloprotease SPRTN	OID41859	SPRTN	0.599164	0.595861	0.010277	0.0117202	0.0024174
P0DMP2	SLIT-ROBO Rho GTPase-activating protein 2B	OID40622	SRGAP2B	5.49583	1.30889	0.000460304	1.08638e-05	0.000509569
O76061	Stanniocalcin-2	OID45270	STC2	-0.050928	-0.0243292	0.00442725	0.000913673	0.00268308
Q687X5	Metalloreductase STEAP4	OID43137	STEAP4	0.558737	0.599884	0.0140484	0.0224158	0.00353015
Q12846	Syntaxin-4	OID44292	STX4	1.91027	0.265454	0.000436552	4.04692e-06	0.00239385
Q9UNK0	Syntaxin-8	OID44294	STX8	1.36367	0.194387	0.00308457	0.000177217	0.0432372
Q96A49	Synapse-associated protein 1	OID44968	SYAP1	2.75821	0.374453	0.00196909	9.27237e-05	0.0267146
Q9Y6A5	Transforming acidic coiled-coil-containing protein 3	OID44303	TACC3	1.64424	0.291184	0.0042458	0.000323886	0.0364637
Q9P2Z0	THAP domain-containing protein 10	OID43183	THAP10	0.45209	0.18853	0.00850606	0.00338435	0.0451225
P40225	Thrombopoietin	OID44322	THPO	0.0812324	0.079378	0.0155063	0.0205536	0.00435446
P82094	TATA element modulatory factor	OID44332	TMF1	1.75479	0.400273	0.00790687	0.000890361	0.036873
Q15643	Thyroid receptor-interacting protein 11	OID44363	TRIP11	2.41299	0.468557	0.00100915	5.25609e-05	0.00391416
Q99576	TSC22 domain family protein 3	OID41961	TSC22D3	2.49528	0.0254418	7.1263e-06	2.39663e-09	0.0435208
Q3SY00	Testis-specific protein 10-interacting protein	OID40680	TSGA10IP	1.05144	0.572693	0.00123366	0.000159467	0.000297528
Q6IBS0	Twinfilin-2	OID45291	TWF2	1.27915	0.314364	0.0103515	0.00140288	0.0423448
Q9BZF9	Uveal autoantigen with coiled-coil domains and ankyrin repeats	OID45006	UACA	2.04827	0.32157	0.000140999	1.66089e-08	0.000247215
P11441	Ubiquitin-like protein 4A	OID44373	UBL4A	0.877257	0.387471	0.00413225	0.000687506	0.00281208
Q6EMK4	Vasorin	OID45429	VASN	0.100947	0.0910336	0.0321051	0.042971	0.0135431
P50552	Vasodilator-stimulated phosphoprotein	OID45430	VASP	1.02396	0.260625	0.00993372	0.00135469	0.0366739
Q9UKW4	Guanine nucleotide exchange factor VAV3	OID44388	VAV3	1.64836	0.179043	0.000504022	1.00007e-05	0.00937126
O75351	Vacuolar protein sorting-associated protein 4B	OID44396	VPS4B	1.8738	0.201311	0.000570043	1.65558e-05	0.0131115
Q9H7M9	V-type immunoglobulin domain-containing suppressor of T-cell activation	OID45015	VSIR	2.53975	0.463361	0.000460304	8.20341e-06	0.00120434
Q6UX27	V-set and transmembrane domain-containing protein 1	OID43279	VSTM1	0.685693	0.272671	0.0255551	0.00844078	0.0416602
