# Supplementary material for: Impact of Delayed Biospecimen Processing on Serum Proteomics in Samples from a Parabolic Flight
Source: Research Square preprint supplement (doi:10.21203/rs.3.rs-7530087/v1), 2025-09-24
Supplement: Supplementary file 8 [file cffd6431facc287e5504410b.xlsx]

## Sheet: Table S3
Supplemental Table 3. Group 3: Inconsistent changes at 24 and 48h.
Glossary of terms
UniProt ID	A unique identifier assigned by the UniProt database to a specific protein
Protein name	The common or scientific name of the protein associated with the UniProt ID
OlinkID	Identifier used by Olink Proteomics for a specific protein assay in OLINK Explore HT panel
Gene Name	The name of the gene that encodes the protein
NPX difference From0to24h	The change in NPX (Normalized Protein eXpression) values between 0 and 24h. NPX is a relative quantification metric used in Olink assays.
NPX difference From24to48h	The change in NPX values between 24 and 48h
Adjusted_pval in lmer results	The adjusted p-value from a linear mixed-effects model (lmer), accounting for multiple testing. Used to assess statistical significance of protein expression changes over time.
From0to24h, Adjusted pvalue in post hoc	Adjusted p-value from post hoc analysis comparing 0 to 24h. Indicates whether the change is statistically significant after correction.
From24to48h, Adjusted pvalue in post hoc	Adjusted p-value from post hoc analysis comparing 24 to 48h.
UniProt ID	Protein name	OlinkID	Gene Name	NPX difference From0to24h	NPX difference From24to48h	Adjusted_pval in lmer results	From0to24h, Adjusted pvalue in post hoc	From24to48h, Adjusted pvalue in post hoc
Q15018	BRISC complex subunit Abraxas 2	OID42081	ABRAXAS2	1.76721	-0.950325	0.00413225	0.000257756	0.000570562
P12821	Angiotensin-converting enzyme	OID45300	ACE	-0.198694	0.243801	0.0268368	0.0291276	0.00274786
O60242	Adhesion G protein-coupled receptor B3	OID43335	ADGRB3	-0.130524	0.084905	0.00353527	0.000295175	0.000267049
P04746_P0DTE7_P0DTE8_P0DUB6_P19961	Alpha-amylase 1/2	OID45304	AMY1_AMY2	-1.57543	0.149596	0.000504022	3.32178e-06	0.00919761
Q9H1A4	Anaphase-promoting complex subunit 1	OID40789	ANAPC1	-0.30445	0.169228	0.0378168	0.0070986	0.0119046
Q8NB46	Serine/threonine-protein phosphatase 6 regulatory ankyrin repeat subunit C	OID40800	ANKRD52	6.75553	-2.12669	0.00368874	0.00012245	0.0136767
O75843	AP-1 complex subunit gamma-like 2	OID42129	AP1G2	1.11776	-0.341673	0.0149554	0.00107899	0.0175062
Q8IW19	Aprataxin and PNK-like factor	OID40024	APLF	0.588897	-0.890362	0.000689796	0.00036189	1.27501e-05
Q9UN42	Protein ATP1B4	OID42157	ATP1B4	0.442457	-0.152179	0.00353527	0.000143158	0.00149819
P20160	Azurocidin	OID45037	AZU1	0.491025	-0.117892	0.0107197	0.000630271	0.023603
Q8TDH9	Biogenesis of lysosome-related organelles complex 1 subunit 5	OID40865	BLOC1S5	1.72628	-0.295541	0.000403918	4.92611e-07	0.000480086
Q6UX52	Protein IL-40	OID40889	C17orf99	-0.57294	0.582254	0.023544	0.0142451	0.00253941
P55211	Caspase-9	OID43456	CASP9	0.464762	-0.312615	0.00248266	0.000188277	0.000153986
I3L3R5	Coiled-coil domain-containing glutamate-rich protein 2	OID43466	CCER2	-0.410053	0.144247	0.00818668	0.000467431	0.00485704
P51671	Eotaxin	OID43468	CCL11	-0.173932	0.13684	0.014795	0.00373294	0.00164318
Q6Q8B3	Cell surface glycoprotein CD200 receptor 2	OID40967	CD200R1L	-2.69741	1.92076	0.0103441	0.00158728	0.00120409
O43866	CD5 antigen-like	OID45450	CD5L	-0.345394	0.0525487	0.00492309	0.000220172	0.0419568
Q9Y4F5	Centrosomal protein of 170 kDa protein B	OID42275	CEP170B	0.741372	-0.310086	0.0128585	0.000940166	0.0167182
Q8NC01	C-type lectin domain family 1 member A	OID43533	CLEC1A	-0.17203	0.110299	0.00172498	0.000102698	9.89683e-05
P09497	Clathrin light chain B	OID44547	CLTB	0.523343	-0.186631	0.017436	0.00153772	0.0129613
P02458	Collagen alpha-1(II) chain	OID43552	COL2A1	-0.10644	0.190651	0.0111534	0.0306162	0.000674346
Q9NZV1	Cysteine-rich motor neuron 1 protein	OID44570	CRIM1	-0.117604	0.200669	0.00299326	0.00436962	0.000107182
P04141	Granulocyte-macrophage colony-stimulating factor	OID42328	CSF2	-0.479961	1.55473	0.000692252	0.00697315	1.35184e-05
Q9NRR1	Cytokine-like protein 1	OID45102	CYTL1	0.405499	-0.128525	9.79433e-07	1.49751e-09	0
P98082	Disabled homolog 2	OID43588	DAB2	0.6726	-0.399681	0.0042458	0.000317106	0.000465108
Q16698	2,4-dienoyl-CoA reductase [(3E)-enoyl-CoA-producing], mitochondrial	OID43601	DECR1	-0.417877	0.167336	0.00818668	0.000530252	0.0030817
Q68D51	DENN domain-containing protein 2C	OID41094	DENND2C	0.735187	-0.348924	0.0441325	0.00648238	0.0432033
O60496	Docking protein 2	OID44611	DOK2	0.469657	-0.502271	0.0224961	0.0153271	0.00232591
Q96MC2	Dynein regulatory complex protein 1	OID40175	DRC1	6.90707	-1.05918	0.000436552	3.35514e-06	0.0317712
P32926	Desmoglein-3	OID43637	DSG3	-0.057465	0.0858017	0.0189742	0.0351778	0.00159661
Q86SJ6	Desmoglein-4	OID43638	DSG4	-0.350708	0.130026	0.0121726	0.000856098	0.00686371
Q5JPI9	EEF1A lysine methyltransferase 2	OID41143	EEF1AKMT2	-1.4925	0.897079	0.0211274	0.00203794	0.00699726
Q13822	Ectonucleotide pyrophosphatase/phosphodiesterase family member 2	OID45117	ENPP2	-0.174685	0.0793605	0.0378168	0.00557475	0.0189096
O75354	Ectonucleoside triphosphate diphosphohydrolase 6	OID43678	ENTPD6	-0.283086	0.0971409	0.0370375	0.00429216	0.0395957
Q86XD5	Protein FAM131B	OID41183	FAM131B	7.8412	-3.63401	0.0200834	0.00220954	0.00817125
P48023	Tumor necrosis factor ligand superfamily member 6	OID43702	FASLG	-0.243981	0.0574483	0.00875667	0.000490012	0.0197706
P31994	Low affinity immunoglobulin gamma Fc region receptor II-b	OID42448	FCGR2B	-0.496838	0.131812	0.00790687	0.000406644	0.0112905
Q96RD9	Fc receptor-like protein 5	OID45126	FCRL5	-0.277257	0.171765	0.038618	0.00874693	0.0099125
Q6DN72	Fc receptor-like protein 6	OID43706	FCRL6	-0.16711	0.0608825	0.0390669	0.00495733	0.035008
Q92765	Secreted frizzled-related protein 3	OID43728	FRZB	-0.366467	0.186807	0.000504022	8.91454e-06	2.97637e-05
O00591	Gamma-aminobutyric acid receptor subunit pi	OID41224	GABRP	-0.949932	0.155148	0.00233508	6.83381e-05	0.0122722
Q9NZD2	Glycolipid transfer protein	OID40269	GLTP	-2.06717	1.40454	0.00726015	0.000907926	0.000708709
P35052	Glypican-1	OID43773	GPC1	-0.636497	0.196698	0.00425507	0.00017772	0.00315909
Q9UJM8	2-Hydroxyacid oxidase 1	OID43790	HAO1	-0.138287	0.091462	0.0173198	0.00302065	0.00288729
P01903	HLA class II histocompatibility antigen, DR alpha chain	OID43805	HLA-DRA	-0.527561	0.175121	0.0405093	0.00501914	0.0474617
O95256	Interleukin-18 receptor accessory protein	OID43848	IL18RAP	-0.252054	0.121377	0.0336035	0.00478236	0.0143374
P51617	Interleukin-1 receptor-associated kinase 1	OID42636	IRAK1	0.541573	-0.190674	0.00902693	0.000391963	0.00736065
Q9UKX5	Integrin alpha-11	OID43875	ITGA11	-0.249389	0.1148	0.0295604	0.00370537	0.0133178
O43736	Integral membrane protein 2A	OID43882	ITM2A	-0.0478569	0.0678679	0.00086975	0.000411151	2.1699e-05
Q99456	Keratin, type I cytoskeletal 12	OID40359	KRT12	5.33649	-5.15891	0.000117721	4.3803e-06	4.2538e-07
Q96S90	LysM and putative peptidoglycan-binding domain-containing protein 1	OID41436	LYSMD1	0.684425	-0.166187	0.0194564	0.00161036	0.0495829
P52564	Dual specificity mitogen-activated protein kinase kinase 6	OID43957	MAP2K6	0.420457	-0.313006	0.000692252	5.17937e-05	2.67169e-05
Q8NBR6	Ubiquitin carboxyl-terminal hydrolase MINDY-2	OID42759	MINDY2	0.286277	-0.157714	0.0173198	0.00229305	0.00392789
O95396	Adenylyltransferase and sulfurtransferase MOCS3	OID41484	MOCS3	1.32437	-0.195506	0.000172212	1.27267e-08	0.000273356
P05164	Myeloperoxidase	OID45189	MPO	0.412152	-0.113567	0.000532307	5.96021e-06	0.000207432
Q96NY9	Crossover junction endonuclease MUS81	OID40431	MUS81	-0.87457	1.05605	0.0441658	0.0498239	0.00606595
Q96A32	Myosin regulatory light chain 11	OID42793	MYL11	0.291087	-0.087713	0.0149554	0.0011162	0.0174829
Q9NP85	Podocin	OID42845	NPHS2	-0.322229	0.203972	0.000436552	6.30748e-06	6.28047e-06
Q16288	NT-3 growth factor receptor	OID44824	NTRK3	-0.244555	0.254052	0.0277204	0.0185052	0.00324622
Q15116	Programmed cell death protein 1	OID44082	PDCD1	-0.349592	0.229381	0.0377728	0.00918546	0.00874712
Q9BQ51	Programmed cell death 1 ligand 2	OID44083	PDCD1LG2	-0.224172	0.0953871	0.00123873	4.58684e-05	0.000169108
Q96HC4	PDZ and LIM domain protein 5	OID44084	PDLIM5	0.237178	-0.234799	0.0121935	0.00416519	0.00122349
P49763	Placenta growth factor	OID44090	PGF	-0.256663	0.0555685	0.00482884	0.000195073	0.0130758
Q15126	Phosphomevalonate kinase	OID42920	PMVK	1.51858	-0.534903	0.00233508	8.63248e-05	0.000722659
P11464	Pregnancy-specific beta-1-glycoprotein 1	OID44133	PSG1	-0.229217	0.0865001	0.0172514	0.00152002	0.0105736
O15539	Regulator of G-protein signaling 5	OID40561	RGS5	5.31791	-5.14032	3.29448e-05	6.81412e-07	9.11249e-08
Q9H6T3	RNA polymerase II-associated protein 3	OID43026	RPAP3	0.575043	-0.360009	0.00797537	0.000912805	0.000956795
P80511	Protein S100-A12	OID44199	S100A12	0.530332	-0.134816	0.0055092	0.000250047	0.00811293
Q8IWT1	Sodium channel subunit beta-4	OID44215	SCN4B	-0.0638626	0.0251295	0.0270656	0.00305834	0.0173784
Q96GA7	Serine dehydratase-like	OID41775	SDSL	-1.33832	0.378204	0.023544	0.00209153	0.0389679
Q86WD7	Serpin A9	OID44229	SERPINA9	-0.291096	0.279933	0.0274815	0.0149968	0.00333207
Q6UXD5	Seizure 6-like protein 2	OID44236	SEZ6L2	-0.370424	0.126979	0.0320213	0.00347277	0.0318263
P53985	Monocarboxylate transporter 1	OID43089	SLC16A1	0.784595	-0.0577857	0.000656279	1.22103e-05	0.0419851
O95721	Synaptosomal-associated protein 29	OID44943	SNAP29	0.707866	-0.815082	0.0271801	0.0245626	0.0029415
Q7Z5L4	Spermatogenesis-associated protein 19, mitochondrial	OID40615	SPATA19	6.13676	-1.00131	0.000504022	3.17346e-06	0.00121442
P08240	Signal recognition particle receptor subunit alpha	OID41865	SRPRA	1.28075	-0.326069	0.00820825	0.000439042	0.0138533
O75886	Signal transducing adapter molecule 2	OID41877	STAM2	-1.42929	0.712798	0.00413225	0.000249713	0.000635643
Q07654	Trefoil factor 3	OID45418	TFF3	-0.213869	0.133169	0.000865564	4.69262e-05	5.04575e-05
P07101	Tyrosine 3-monooxygenase	OID40658	TH	0.825	-0.647784	0.0425163	0.012551	0.00988614
P98073	Enteropeptidase	OID44334	TMPRSS15	-0.163779	0.148922	0.0035172	0.000650559	0.000172432
Q9Y6Q6	Tumor necrosis factor receptor superfamily member 11A	OID44340	TNFRSF11A	-0.278778	0.226967	0.00107319	0.00010063	4.49799e-05
Q8IZW8	Tensin-4	OID40670	TNS4	0.486137	-1.16828	0.000140999	0.000113806	0
Q06418	Tyrosine-protein kinase receptor TYRO3	OID45005	TYRO3	-0.164386	0.0815751	0.0128585	0.00127818	0.00326939
O94941	RING finger protein 37	OID41988	UBOX5	0.467643	-0.351387	0.00228087	0.000226147	0.000153382
O75132	Zinc finger BED domain-containing protein 4	OID42039	ZBED4	2.59753	-0.867681	0.0355926	0.00351453	0.0452444
Q6ZSB9	Zinc finger and BTB domain-containing protein 49	OID42043	ZBTB49	1.17523	-0.319949	0.00322027	0.00011632	0.00302783
O43296	Zinc finger protein 264	OID42060	ZNF264	1.45444	-0.44634	0.00752197	0.000381057	0.00654166
Q96NB3	Zinc finger protein 830	OID43307	ZNF830	0.805159	-0.672228	0.0236005	0.00843627	0.00307647
