# Supplementary material for: Impact of Delayed Biospecimen Processing on Serum Proteomics in Samples from a Parabolic Flight
Source: Research Square preprint supplement (doi:10.21203/rs.3.rs-7530087/v1), 2025-09-24
Supplement: Supplementary file 9 [file db1a14658692d3565108899a.xlsx]

## Sheet: Table S8
Supplemental Table 8. Top 30 biochemical pathways for stable proteome at 24 and 48h.
Glossary of terms
Enrichment FDR	The false discovery rate–adjusted p-value, representing the statistical probability that the observed pathway enrichment occurred by chance after correction for multiple hypothesis testing
nGenes	The number of genes in the pathway that overlap with gene list provided
Pathway Genes	The total number of genes in a pathway or GO term
% Gene Representation	The percentage of gene representing the pathway
Fold Enrichment	Measures the magnitude of enrichment. Higher values indicate stronger enrichment and are an important metric of effect size.
Pathway	Kegg pathway
Genes	The list of genes identified from the list provided for the corresponding pathway
Enrichment FDR	nGenes	Pathway Genes	% Gene Representation	Fold Enrichment	Pathway	Genes
1.6177e-31	115	294	0.391156	3.35208	Path:hsa04060 Cytokine-cytokine receptor interaction	CCL26 CXCL13 CCL27 EDAR CSF1 CSF1R CSF2RA CSF2RB CSF3 IFNLR1 EPO TNFRSF13B GDF2 MSTN GH2 GHR IL36B IL17C TNFRSF21 BMP10 CXCL17 CXCL1 CXCL3 IL19 IFNA2 IFNAR1 IFNAR2 IFNB1 IFNG IFNGR1 FAS IL1RAP IL1RN IL2RA IL3 IL4R IL5RA IL6 IL6R IL6ST IL7 IL7R IL10 IL10RB IL12RB1 IL13RA1 IL15 IL16 TNFRSF9 IL17A IL18 INHBB INHBC CXCL10 IL31 LEP LEPR LIFR LTBR CXCL9 NODAL TNFRSF11B IL22 TNFRSF12A PF4 IL17D PPBP TNF…
1.95781e-16	102	354	0.288136	2.46922	Path:hsa04151 PI3K-Akt signaling pathway	YWHAQ CHAD CDC37 CHUK PIK3AP1 COL1A1 COL4A1 COL6A3 COL9A1 COMP CSF1 CSF1R CSF3 EFNA1 EGFR EPHA2 EIF4B EIF4E EIF4EBP1 EPO ERBB2 ERBB3 ERBB4 AKT2 F2R FGF1 FGF5 FGF9 FGFR2 FGFR4 VEGFD FLT1 FLT3 FLT3LG FLT4 FN1 FGF21 GH2 GHR ANGPT1 ANGPT2 GYS1 HGF TNC IFNA2 IFNAR1 IFNAR2 IFNB1 IL2RA IL3 IL4R IL6 IL6R IL7 IL7R ITGA6 ITGA5 ITGAV ITGB1 ITGB5 ITGB7 AREG KDR KIT LAMA4 LAMB1 LAMB2 MET KITLG NFKB1 NTF3 NTRK…
2.97739e-15	59	156	0.378205	3.24109	Path:hsa04514 Cell adhesion molecules	CDH3 CDH5 CDH15 ICOSLG CD226 SLITRK1 CNTN1 VCAN IGSF11 TIGIT ALCAM NFASC CD274 ICAM1 ICAM2 ICAM3 ITGA6 ITGAL ITGAM ITGAV ITGB1 ITGB2 ITGB7 L1CAM MAG NCAM1 NCAM2 NEO1 NRCAM PECAM1 PTPRF PTPRS PVR NECTIN2 JAM2 SDC1 SDC4 SELE SELL LRRC4 SIGLEC1 SPN CNTN2 VCAM1 CD99L2 SLITRK6 SLITRK2 ESAM CD4 CD6 CD8A CD22 NRXN1 CD28 CD80 CD86 CD34 CD40LG CD58
2.82753e-13	39	85	0.458824	3.93196	Path:hsa04610 Complement and coagulation cascades	CFHR4 VSIG4 CLU CPB2 CR1 CR2 CD55 F2R F3 F7 F9 F10 F11 F12 F13B SERPIND1 CFI ITGAM ITGB2 KLKB1 MBL2 SERPINE1 SERPINA5 SERPINE2 PLAU PLAUR PLG PROC TFPI THBD SERPING1 C1S C4BPB C7 C8B C9 VTN VWF CFHR5
6.05455e-13	42	99	0.424242	3.63561	Path:hsa04061 Viral protein interaction with cytokine and cytokine receptor	CXCL13 CCL27 CSF1 CSF1R CXCL1 CXCL3 IL19 IL2RA IL6 IL6R IL6ST IL10 IL10RB IL18 CXCL10 LTBR CXCL9 PF4 PPBP CCL28 IL22RA1 CCL2 CCL8 CCL13 CCL17 CCL19 CCL20 CCL21 CCL24 CCL25 CXCL6 CXCL11 CXCL5 XCL1 CX3CL1 TNFRSF1A TNFRSF1B TNFSF10 TNFRSF10C TNFRSF10B TNFRSF10A IL18R1
2.82527e-12	41	99	0.414141	3.54905	Path:hsa04640 Hematopoietic cell lineage	CR1 CR2 CSF1 CSF1R CSF2RA CSF3 CD55 EPO FCER2 FLT3 FLT3LG GP5 ANPEP GYPA IL2RA IL3 IL4R IL5RA IL6 IL6R IL7 IL7R ITGA6 ITGA5 ITGAM KIT KITLG MME TFRC IL1R2 CD1C CD3E CD4 CD5 CD8A CD14 MS4A1 CD22 CD33 CD34 CD38
2.31589e-09	50	162	0.308642	2.64496	Path:hsa04630 JAK-STAT signaling pathway	CSF2RA CSF2RB CSF3 IFNLR1 EGFR EPO AKT2 GFAP GH2 GHR IL19 IFNA2 IFNAR1 IFNAR2 IFNB1 IFNG IFNGR1 IL2RA IL3 IL4R IL5RA IL6 IL6R IL6ST IL7 IL7R IL10 IL10RB IL12RB1 IL13RA1 IL15 LEP LEPR LIFR IL22 PDGFA PDGFB PDGFRA PDGFRB IL17D PRL PTPN6 PTPN11 IL22RA1 CCND1 BCL2L1 STAT2 STAT5B CCND2 OSMR
5.17897e-09	24	49	0.489796	4.19739	Path:hsa05144 Malaria	COMP CR1 CSF3 GYPA HGF ICAM1 IFNG IL6 IL10 IL18 ITGAL ITGB2 KLRB1 LRP1 MET PECAM1 CCL2 SDC1 SELE TGFB1 THBS2 THBS4 VCAM1 CD40LG
2.2197e-08	57	210	0.271429	2.32605	Path:hsa04015 Rap1 signaling pathway	RASGRP2 ADCY3 CSF1 CSF1R CTNND1 CALML6 DRD2 EFNA1 EGFR EPHA2 AKT2 F2R FGF1 FGF5 FGF9 FGFR2 FGFR4 VEGFD FLT1 FLT4 FYB1 FGF21 LAT ANGPT1 ANGPT2 HGF ITGAL ITGAM ITGB1 ITGB2 KDR KIT LCP2 MET KITLG PDGFA PDGFB PDGFRA PDGFRB PLCB2 APBB1IP ENAH MAP2K1 PARD3 RRAS SIPA1 SRC TEK VEGFB VEGFC PDGFD FGF23 RASSF5 SKAP1 CALML4 RAPGEF2 FGF19
3.31286e-08	110	530	0.207547	1.77861	Path:hsa05200 Pathways in cancer	RASGRP2 ADCY3 GADD45G RALBP1 CHUK COL4A1 CSF1R CSF2RA CSF2RB CALML6 NQO1 EDN1 EGFR EPAS1 EPO ERBB2 AKT2 F2R FGF1 FGF5 FGF9 FGFR2 FGFR4 VEGFD FOXO1 FLT3 FLT3LG FLT4 FN1 ARHGEF12 DAPK2 ALK ABL1 FGF21 EML4 GSTA1 GSTA3 GSTM4 GSTP1 HGF HMOX1 IFNA2 IFNAR1 IFNAR2 IFNG IFNGR1 FAS IL2RA IL3 IL4R IL5RA IL6 IL6R IL6ST IL7 IL7R IL12RB1 IL13RA1 IL15 ITGA6 ITGAV ITGB1 KIT LAMA4 LAMB1 LAMB2 MET KITLG MMP1 MMP9 …
4.38885e-08	71	294	0.241497	2.06954	Path:hsa04010 MAPK signaling pathway	RASGRP2 GADD45G CHUK CSF1 CSF1R EFNA1 EGFR EPHA2 ERBB2 ERBB3 ERBB4 AKT2 FGF1 FGF5 FGF9 FGFR2 FGFR4 VEGFD MAPK8IP3 FLT1 FLT3 FLT3LG FLT4 FGF21 ANGPT1 ANGPT2 HGF HSPB1 FAS IL1RAP AREG KDR KIT MEF2C MAP3K3 MAP3K4 MET KITLG NFKB1 NTF3 NTRK2 IRAK4 PDGFA PDGFB PDGFRA PDGFRB PLA2G4A PPP3R1 MAPK9 MAP2K1 PTPRR RRAS BDNF STK4 TEK TGFA TGFB1 TGFBR2 TNFRSF1A TP53 TRAF2 VEGFB VEGFC CACNB1 PDGFD FGF23 CASP3 MK…
5.84815e-08	41	132	0.310606	2.66179	Path:hsa04142 Lysosome	NPC2 CTSC TPP1 CLTA CTSD CTSE CTSH CTSL CTSV CTSS CTSW CTSZ ABCA2 GGA2 GGA3 PLA2G15 FUCA1 LAMP3 GLB1 GM2A GUSB IDS IDUA IGF2R LAMP2 M6PR ARSB NAGA NAGPA ACP5 CTSA LGMN PSAP SORT1 SGSH SMPD1 PSAPL1 CTSF CD164 SCARB2 CD63
6.65137e-07	30	88	0.340909	2.92148	Path:hsa04512 ECM-receptor interaction	CHAD COL1A1 COL4A1 COL6A3 COL9A1 COMP DSPP FN1 GP5 HSPG2 TNC ITGA6 ITGA5 ITGAV ITGB1 ITGB5 ITGB7 AGRN LAMA4 LAMB1 LAMB2 SDC1 SDC4 TNN SPP1 THBS2 THBS4 TNR VTN VWF
6.65137e-07	35	112	0.3125	2.67802	Path:hsa04668 TNF signaling pathway	CEBPB CHUK CSF1 EDN1 AKT2 VEGFD CXCL1 CXCL3 ICAM1 IFNB1 FAS IL6 IL15 CXCL10 MMP3 MMP9 NFKB1 MAPK9 MAP2K1 CCL2 CCL20 CXCL6 CXCL5 CX3CL1 SELE TNFRSF1A TNFRSF1B TRAF2 VCAM1 VEGFC CASP3 CASP8 CASP10 FADD IL18R1
1.09995e-06	57	235	0.242553	2.0786	Path:hsa04014 Ras signaling pathway	RASGRP2 RALBP1 CHUK CSF1 CSF1R CALML6 EFNA1 EGFR EPHA2 AKT2 FGF1 FGF5 FGF9 FGFR2 FGFR4 VEGFD FLT1 FLT3 FLT3LG FLT4 ABL1 FGF21 LAT ANGPT1 ANGPT2 HGF KDR KIT MET KITLG NFKB1 NTF3 NTRK2 PDGFA PDGFB PDGFRA PDGFRB PLA2G1B PLA2G2A PLA2G4A MAPK9 MAP2K1 PTPN11 BCL2L1 RRAS BDNF STK4 TEK TGFA VEGFB VEGFC PDGFD FGF23 BRAP RASSF5 CALML4 FGF19
1.90777e-06	39	138	0.282609	2.42186	Path:hsa05418 Fluid shear stress and atherosclerosis	CDH5 CHUK CTSL CALML6 NQO1 EDN1 AKT2 GSTA1 GSTA3 GSTM4 GSTP1 HMOX1 ICAM1 IFNG ITGAV KDR MEF2C MMP9 ASS1 NCF2 NFKB1 NPPC PDGFA PDGFB PECAM1 MAPK9 CCL2 SDC1 SDC4 SELE SRC THBD TNFRSF1A TP53 SUMO1 VCAM1 IL1R2 ARHGEF2 CALML4
2.24941e-06	30	93	0.322581	2.76441	Path:hsa04657 IL-17 signaling pathway	CEBPB CHUK CSF3 FOSB IL17C CXCL1 CXCL3 USP25 IFNG IL6 IL17A CXCL10 LCN2 MMP1 MMP3 MMP9 MMP13 NFKB1 IL17D IL17RB MAPK9 CCL2 CCL17 CCL20 CXCL6 CXCL5 TRAF2 CASP3 CASP8 FADD
5.61067e-06	49	200	0.245	2.09957	Path:hsa04510 Focal adhesion	CHAD COL1A1 COL4A1 COL6A3 COL9A1 COMP EGFR ERBB2 AKT2 VEGFD FLT1 FLT4 FN1 HGF TNC ITGA6 ITGA5 ITGAV ITGB1 ITGB5 ITGB7 KDR LAMA4 LAMB1 LAMB2 MET PPP1R12A PPP1R12B PDGFA PDGFB PDGFRA PDGFRB MAPK9 MAP2K1 PXN CCND1 TNN SPP1 SRC THBS2 THBS4 TNR VEGFB VEGFC VTN VWF PDGFD CCND2 MYL10
7.31974e-06	49	202	0.242574	2.07878	Path:hsa05205 Proteoglycans in cancer	HPSE COL1A1 CTSL DCN HBEGF EGFR EIF4B ERBB2 ERBB3 ERBB4 AKT2 FN1 ARHGEF12 DROSHA HCLS1 HGF HSPG2 FAS ITGA5 ITGAV ITGB1 ITGB5 KDR LUM MET MMP9 PPP1R12A PPP1R12B WNT16 PLAU PLAUR MAP2K1 PTPN6 PTPN11 PXN CCND1 RRAS SDC1 SDC4 SRC TGFB1 TIMP3 TP53 EZR VTN NANOG CASP3 ARHGEF1 CD63
1.89569e-05	28	92	0.304348	2.60816	Path:hsa05323 Rheumatoid arthritis	CSF1 CTSL FLT1 ANGPT1 CXCL1 CXCL3 ICAM1 IFNG IL6 IL15 IL17A IL18 ITGAL ITGB2 MMP1 MMP3 ACP5 CCL2 CCL20 CXCL6 CXCL5 TEK TGFB1 TNFSF11 TNFSF13 CD28 CD80 CD86
2.5086e-05	36	136	0.264706	2.26844	Path:hsa04210 Apoptosis	CTSC GADD45G CHUK CSF2RB CTSD CTSH CTSL CTSV CTSS CTSW CTSZ DFFA AKT2 ERN1 HTRA2 FAS IL3 LMNB1 NFKB1 MAPK9 MAP2K1 DIABLO BCL2L1 TNFRSF1A TP53 TRAF2 CASP3 CASP8 CASP10 LMNB2 CTSF TNFSF10 FADD TNFRSF10B TNFRSF10A AIFM1
8.21505e-05	33	126	0.261905	2.24444	Path:hsa04380 Osteoclast differentiation	SIRPB1 CHUK SIRPA CSF1 CSF1R CYLD AKT2 FCGR2A FOSB IFNAR1 IFNAR2 IFNB1 IFNG IFNGR1 LCK LCP2 NCF2 NFKB1 TNFRSF11B ACP5 TREM2 PPP3R1 SIRPG MAPK9 MAP2K1 STAT2 SYK TGFB1 TGFBR2 TNFRSF1A TRAF2 CAMK4 TNFSF11
0.000148678	9	15	0.6	5.1418	Path:hsa00730 Thiamine metabolism	AK1 AK2 ALPI ALPP ALPG TPK1 ACP1 THTPA NTPCR
0.000196958	29	109	0.266055	2.28	Path:hsa04066 HIF-1 signaling pathway	EDN1 EGFR EIF4E EIF4EBP1 ENO1 ENO2 ENO3 EPO ERBB2 AKT2 FLT1 GAPDH ANGPT1 ANGPT2 HMOX1 IFNG IFNGR1 IL6 IL6R LTBR NFKB1 SERPINE1 EGLN1 MAP2K1 TEK TF TFRC TIMP1 MKNK1
0.000252438	47	217	0.21659	1.8561	Path:hsa04810 Reg. of actin cytoskeleton	BAIAP2 EGFR F2R FGF1 FGF5 FGF9 FGFR2 FGFR4 FN1 ARHGEF12 FGF21 GIT1 GSN ITGA6 ITGA5 ITGAD ITGAL ITGAM ITGAV ITGB1 ITGB2 ITGB5 ITGB7 MYH9 MYH10 PPP1R12A PPP1R12B PDGFA PDGFB PDGFRA PDGFRB SSH3 ENAH BRK1 MAP2K1 PXN RRAS SRC EZR PDGFD FGF23 WASF1 WASL FGD3 ARHGEF1 MYL10 FGF19
0.000287634	23	79	0.291139	2.49497	Path:hsa01521 EGFR tyrosine kinase inhibitor resistance	EGFR EIF4E EIF4EBP1 ERBB2 ERBB3 AKT2 FGFR2 GAS6 HGF IL6 IL6R KDR MET PDGFA PDGFB PDGFRA PDGFRB AXL MAP2K1 BCL2L1 SRC TGFA PDGFD
0.00054591	27	104	0.259615	2.22482	Path:hsa04064 NF-kappa B signaling pathway	GADD45G EDAR CHUK EDARADD CYLD LAT CXCL1 CXCL3 ICAM1 LBP LCK LTBR NFKB1 IRAK4 PLAU BCL2L1 EDA2R CCL13 CCL19 CCL21 SYK TNFRSF1A TRAF2 VCAM1 TRIM25 TNFSF11 CD14
0.000714764	45	214	0.21028	1.80203	Path:hsa05417 Lipid and atherosclerosis	CHUK CALML6 AKT2 ERN1 CXCL1 CXCL3 APOA1 APOA4 ICAM1 IFNA2 IFNB1 FAS IL6 IL18 LBP LDLR MMP1 MMP3 MMP9 NCF2 NFKB1 OLR1 IRAK4 PLCB2 PPP3R1 MAPK9 BCL2L1 CCL2 SELE SOD2 SRC TNFRSF1A TP53 TRAF2 VCAM1 CASP1 CASP3 CASP8 TNFSF10 TNFRSF10B TNFRSF10A ARHGEF1 CALML4 CD14 CD40LG
0.000747734	16	48	0.333333	2.85655	Path:hsa04672 Intestinal immune network for IgA production	ICOSLG TNFRSF13B IL6 IL10 IL15 ITGB7 LTBR PIGR CCL28 TNFRSF17 CCL25 TGFB1 TNFSF13 CD28 CD80 CD86
0.000874952	23	85	0.270588	2.31885	Path:hsa01232 Nucleotide metabolism	CANT1 NUDT16 ADSL DTYMK DUT TYMP AK1 AK2 AMPD3 GMPR GUK1 APRT NME3 PNP NT5E ENPP1 ADA2 TYMS DCTPP1 NTPCR NT5C1A ENTPD2 ENTPD5
